# Supplementary material
Source: PubMed Central journal article supplement (PMC9351470)
Supplement: NIHMS1826483-supplement-Supporting_Information.pdf [file NIHMS1826483-supplement-Supporting_Information.pdf]

## Reversible Dioxygen Scavenging from Air by a Copper Complex

Kurtis M. Carsch,<sup>†\*</sup> Andrei Iliescu,<sup>†\*</sup> Ryan D. McGillicuddy,<sup>†</sup> Jarad A. Mason,<sup>†</sup>

Theodore A. Betley<sup>†</sup>

<sup>†</sup>*Department of Chemistry and Chemical Biology*

*Harvard University*

*12 Oxford Street, Cambridge, MA 02138*

*\*These authors contributed equally.*

Corresponding Author: [betley@chemistry.harvard.edu](mailto:betley@chemistry.harvard.edu)

| Section                                                                                                                                                                                  | Page       |
|------------------------------------------------------------------------------------------------------------------------------------------------------------------------------------------|------------|
| <b>Table of Contents</b>                                                                                                                                                                 | <b>S2</b>  |
| <b>Materials and Methods</b>                                                                                                                                                             | <b>S4</b>  |
| General Considerations                                                                                                                                                                   | S4         |
| Characterization and Physical Measurements                                                                                                                                               | S5         |
| <b>Metal Complex Syntheses</b>                                                                                                                                                           | <b>S6</b>  |
| $(^{E\text{Mind}}\text{L})\text{Cu}(\text{O}_2)$ ( <b>2</b> ) Synthesis                                                                                                                  | S6         |
| Figure S1. $^1\text{H}$ NMR Spectrum of $(^{E\text{Mind}}\text{L})\text{Cu}(\text{O}_2)$ ( <b>2</b> )                                                                                    | S7         |
| Figure S2. $^{13}\text{C}$ NMR Spectrum of $(^{E\text{Mind}}\text{L})\text{Cu}(\text{O}_2)$ ( <b>2</b> )                                                                                 | S7         |
| Figure S3. $^{19}\text{F}$ NMR Spectrum of $(^{E\text{Mind}}\text{L})\text{Cu}(\text{O}_2)$ ( <b>2</b> )                                                                                 | S7         |
| Figure S4. High Resolution Mass Spectrometry (HRMS) of $(^{E\text{Mind}}\text{L})\text{Cu}(\text{O}_2)$ ( <b>2</b> )                                                                     | S8         |
| Figure S5. Cyclic Voltammogram of $(^{E\text{Mind}}\text{L})\text{Cu}(\text{O}_2)$ ( <b>2</b> )                                                                                          | S9         |
| $(^{E\text{Mind}}\text{L})\text{Cu}(\text{toluene})$ ( <b>3</b> ) Synthesis                                                                                                              | S10        |
| Figure S6. $^1\text{H}$ NMR Spectrum of $(^{E\text{Mind}}\text{L})\text{Cu}(\text{toluene})$ ( <b>3</b> )                                                                                | S11        |
| Figure S7. $^{13}\text{C}$ NMR Spectrum of $(^{E\text{Mind}}\text{L})\text{Cu}(\text{toluene})$ ( <b>3</b> )                                                                             | S11        |
| Figure S8. $^{19}\text{F}$ NMR Spectrum of $(^{E\text{Mind}}\text{L})\text{Cu}(\text{toluene})$ ( <b>3</b> )                                                                             | S11        |
| $(^{E\text{Mind}}\text{L})\text{Cu}(\text{CH}_2\text{Cl}_2)$ ( <b>4</b> ) Synthesis                                                                                                      | S12        |
| Figure S9. $^1\text{H}$ NMR Spectrum of $(^{E\text{Mind}}\text{L})\text{Cu}(\text{CH}_2\text{Cl}_2)$ ( <b>4</b> )                                                                        | S13        |
| Figure S10. $^{13}\text{C}$ NMR Spectrum of $(^{E\text{Mind}}\text{L})\text{Cu}(\text{CH}_2\text{Cl}_2)$ ( <b>4</b> )                                                                    | S13        |
| Figure S11. $^{19}\text{F}$ NMR Spectrum of $(^{E\text{Mind}}\text{L})\text{Cu}(\text{CH}_2\text{Cl}_2)$ ( <b>4</b> )                                                                    | S13        |
| $(^{E\text{Mind}}\text{L})\text{Cu}(\text{NH}_2\text{NH}_2)$ ( <b>5</b> ) Synthesis                                                                                                      | S14        |
| Figure S12. $^1\text{H}$ NMR Spectrum of $(^{E\text{Mind}}\text{L})\text{Cu}(\text{NH}_2\text{NH}_2)$ ( <b>5</b> )                                                                       | S15        |
| Figure S13. $^{13}\text{C}$ NMR Spectrum of $(^{E\text{Mind}}\text{L})\text{Cu}(\text{NH}_2\text{NH}_2)$ ( <b>5</b> )                                                                    | S15        |
| Figure S14. $^{19}\text{F}$ NMR Spectrum of $(^{E\text{Mind}}\text{L})\text{Cu}(\text{NH}_2\text{NH}_2)$ ( <b>5</b> )                                                                    | S15        |
| $(^{E\text{Mind}}\text{L})\text{CuI}$ ( <b>6</b> ) Synthesis                                                                                                                             | S16        |
| Figure S15. $^1\text{H}$ NMR Spectrum of $(^{E\text{Mind}}\text{L})\text{CuI}$ ( <b>6</b> )                                                                                              | S17        |
| Figure S16. $^{19}\text{F}$ NMR Spectrum of $(^{E\text{Mind}}\text{L})\text{CuI}$ ( <b>6</b> )                                                                                           | S17        |
| Figure S17. Room Temperature EPR spectrum of $(^{E\text{Mind}}\text{L})\text{CuI}$ ( <b>6</b> )                                                                                          | S18        |
| Figure S18. Low Temperature (77 K) EPR spectrum of $(^{E\text{Mind}}\text{L})\text{CuI}$ ( <b>6</b> )                                                                                    | S19        |
| Figure S19. Cyclic Voltammogram of $(^{E\text{Mind}}\text{L})\text{CuI}$ ( <b>6</b> )                                                                                                    | S20        |
| $(^{E\text{Mind}}\text{L})\text{Cu}(\text{H}_2\text{O}_2)$ ( <b>7</b> ) Synthesis                                                                                                        | S21        |
| Figure S20. $^1\text{H}$ NMR Spectrum of $(^{E\text{Mind}}\text{L})\text{Cu}(\text{H}_2\text{O}_2)$ ( <b>7</b> )                                                                         | S22        |
| Figure S21. $^{19}\text{F}$ NMR Spectrum of $(^{E\text{Mind}}\text{L})\text{Cu}(\text{H}_2\text{O}_2)$ ( <b>7</b> )                                                                      | S22        |
| Figure S22. Independent Synthesis and Comparison of $(^{E\text{Mind}}\text{L})\text{Cu}(\text{H}_2\text{O}_2)$ ( <b>7</b> )                                                              | S23        |
| <b>Supporting Spectroscopic Characterization</b>                                                                                                                                         | <b>S24</b> |
| Figure S23. Visual Comparison between $(^{E\text{Mind}}\text{L})\text{Cu}(\text{N}_2)$ ( <b>1</b> ) and $(^{E\text{Mind}}\text{L})\text{Cu}(\text{O}_2)$ ( <b>2</b> )                    | S24        |
| Figure S24. $^1\text{H}$ NMR Spectra of $(^A\text{L})\text{Cu}$ and Air Exposure                                                                                                         | S24        |
| Figure S25. $\text{O}_2$ Transfer from $(^{E\text{Mind}}\text{L})\text{Cu}(\text{O}_2)$ ( <b>2</b> ) to $\text{IMes}_2\text{Pd}$                                                         | S25        |
| Solvent Cycling Supporting NMR Spectra                                                                                                                                                   | S26        |
| Figure S26. $^1\text{H}$ NMR Spectrum of $(^{E\text{Mind}}\text{L})\text{Cu}(\text{toluene})$ ( <b>3</b> ) from $(^{E\text{Mind}}\text{L})\text{Cu}(\text{O}_2)$ ( <b>2</b> )            | S27        |
| Figure S27. $^{19}\text{F}$ NMR Spectrum of $(^{E\text{Mind}}\text{L})\text{Cu}(\text{toluene})$ ( <b>3</b> ) from $(^{E\text{Mind}}\text{L})\text{Cu}(\text{O}_2)$ ( <b>2</b> )         | S27        |
| Figure S28. $^1\text{H}$ NMR Spectrum of $(^{E\text{Mind}}\text{L})\text{Cu}(\text{O}_2)$ ( <b>2</b> ) from $(^{E\text{Mind}}\text{L})\text{Cu}(\text{toluene})$ ( <b>3</b> )            | S28        |
| Figure S29. $^{19}\text{F}$ NMR Spectrum of $(^{E\text{Mind}}\text{L})\text{Cu}(\text{O}_2)$ ( <b>2</b> ) from $(^{E\text{Mind}}\text{L})\text{Cu}(\text{toluene})$ ( <b>3</b> )         | S28        |
| Figure S30. $^1\text{H}$ NMR Spectrum of $(^{E\text{Mind}}\text{L})\text{Cu}(\text{CH}_2\text{Cl}_2)$ ( <b>4</b> ) from $(^{E\text{Mind}}\text{L})\text{Cu}(\text{O}_2)$ ( <b>2</b> )    | S29        |
| Figure S31. $^{19}\text{F}$ NMR Spectrum of $(^{E\text{Mind}}\text{L})\text{Cu}(\text{CH}_2\text{Cl}_2)$ ( <b>4</b> ) from $(^{E\text{Mind}}\text{L})\text{Cu}(\text{O}_2)$ ( <b>2</b> ) | S29        |
| Figure S32. $^1\text{H}$ NMR Spectrum of $(^{E\text{Mind}}\text{L})\text{Cu}(\text{O}_2)$ ( <b>2</b> ) from $(^{E\text{Mind}}\text{L})\text{Cu}(\text{CH}_2\text{Cl}_2)$ ( <b>4</b> )    | S30        |
| Figure S33. $^{19}\text{F}$ NMR Spectrum of $(^{E\text{Mind}}\text{L})\text{Cu}(\text{O}_2)$ ( <b>2</b> ) from $(^{E\text{Mind}}\text{L})\text{Cu}(\text{CH}_2\text{Cl}_2)$ ( <b>4</b> ) | S30        |
| Table S1. Additional Ligand Displacement Observations                                                                                                                                    | S31        |

|                                                                                                                                                            |            |
|------------------------------------------------------------------------------------------------------------------------------------------------------------|------------|
| <i>Redox Cycling Supporting NMR Spectra</i>                                                                                                                | S32        |
| Figure S34. <sup>1</sup> H NMR Spectra of reformation of ( <sup>EMindL</sup> )Cu(O <sub>2</sub> ) ( <b>2</b> ) from ( <sup>EMindL</sup> )CuI ( <b>6</b> )  | S33        |
| Figure S35. <sup>19</sup> F NMR Spectra of reformation of ( <sup>EMindL</sup> )Cu(O <sub>2</sub> ) ( <b>2</b> ) from ( <sup>EMindL</sup> )CuI ( <b>6</b> ) | S33        |
| <i>Thermal Cycling Supporting NMR Spectra</i>                                                                                                              | S34        |
| Figure S36–S37. TGA Cycling Studies                                                                                                                        | S34        |
| Figure S38. <sup>1</sup> H NMR Spectrum of post-TGA ( <sup>EMindL</sup> )Cu(O <sub>2</sub> ) ( <b>2</b> )                                                  | S35        |
| Figure S39. <sup>19</sup> F NMR Spectrum of post-TGA ( <sup>EMindL</sup> )Cu(O <sub>2</sub> ) ( <b>2</b> )                                                 | S35        |
| Figure S40. <sup>1</sup> H NMR Spectrum of ( <sup>EMindL</sup> )Cu(O <sub>2</sub> ) ( <b>2</b> ) under N <sub>2</sub> Atmosphere                           | S36        |
| Figure S41. <sup>19</sup> F NMR Spectrum of ( <sup>EMindL</sup> )Cu(O <sub>2</sub> ) ( <b>2</b> ) under N <sub>2</sub> Atmosphere                          | S36        |
| Figure S42. <sup>1</sup> H NMR Spectrum of ( <sup>EMindL</sup> )Cu(O <sub>2</sub> ) ( <b>2</b> ) Following Solid-state Thermolysis                         | S37        |
| Figure S43. TGA Temperature Sweep under Ar                                                                                                                 | S37        |
| Single–Crystal–to–Single–Crystal Transformations                                                                                                           | S38        |
| Figure S44 to S48. Supporting Characterization of Crystalline Transformations                                                                              | S38        |
| Hydrazine Oxidation NMR Spectra                                                                                                                            | S43        |
| Figure S49. Post-catalytic <sup>1</sup> H NMR Spectrum of 1,2-diphenylhydrazine Oxidation                                                                  | S44        |
| Figure S50. <sup>1</sup> H NMR Spectrum of 1,2-diphenylhydrazine Oxidation with Comparison to Standards                                                    | S44        |
| Figure S51. Post-catalytic <sup>1</sup> H NMR Spectrum of 1,2-diphenylhydrazine Oxidation in Hexanes                                                       | S44        |
| Figure S52. Post-catalytic <sup>1</sup> H NMR Spectrum of 1,2-diphenylhydrazine Oxidation in Absence of <b>2</b>                                           | S45        |
| Figure S53. Post-catalytic <sup>1</sup> H NMR Spectrum of Hydrogen Peroxide Formation                                                                      | S45        |
| Figure S54. Geometry Optimization of ( <sup>EMindL</sup> )Cu(H <sub>2</sub> O <sub>2</sub> ) ( <b>7</b> )                                                  | S46        |
| <b>Crystallography Details</b>                                                                                                                             | <b>S50</b> |
| Table S2. Single Crystal X-ray Diffraction Metrics                                                                                                         | S50        |
| XRD Refinement Details                                                                                                                                     | S52        |
| Table S3. Pertinent Bond Metrics of ( <sup>EMindL</sup> )Cu(η <sup>2</sup> -C <sub>6</sub> H <sub>6</sub> ) ( <b>1-benzene</b> ) at 100 K                  | S55        |
| Table S4. Pertinent Bond Metrics of ( <sup>EMindL</sup> )Cu(O <sub>2</sub> ) ( <b>2</b> ) at 100 K                                                         | S55        |
| Table S5. Pertinent Bond Metrics of ( <sup>EMindL</sup> )Cu(CH <sub>2</sub> Cl <sub>2</sub> ) ( <b>4</b> )                                                 | S55        |
| Table S6. Pertinent Bond Metrics of ( <sup>EMindL</sup> )Cu(NH <sub>2</sub> NH <sub>2</sub> ) ( <b>5</b> )                                                 | S55        |
| Table S7. Pertinent Bond Metrics of ( <sup>EMindL</sup> )CuI ( <b>6</b> )                                                                                  | S55        |
| Figure S55. Solid-state Structure of ( <sup>EMindL</sup> )Cu(η <sup>2</sup> -C <sub>6</sub> H <sub>6</sub> ) ( <b>1-benzene</b> )                          | S56        |
| Figure S56. Solid-state Structure of ( <sup>EMindL</sup> )Cu(O <sub>2</sub> ) ( <b>2</b> ) at 100 K                                                        | S57        |
| Figure S57. Solid-state Structure of ( <sup>EMindL</sup> )Cu(CH <sub>2</sub> Cl <sub>2</sub> ) ( <b>4</b> )                                                | S58        |
| Figure S58. Solid-state Structure of ( <sup>EMindL</sup> )Cu(NH <sub>2</sub> NH <sub>2</sub> ) ( <b>5</b> )                                                | S59        |
| Figure S59. Solid-state Structure of ( <sup>EMindL</sup> )CuI ( <b>6</b> )                                                                                 | S60        |
| <b>References</b>                                                                                                                                          | <b>S61</b> |
| <b>CheckCIF Output Files</b>                                                                                                                               | <b>S62</b> |

## Materials and Methods.

**General Considerations.** All manipulations were carried out under ambient air in a well-ventilated fume hood, unless specified otherwise. For air-sensitive manipulations, an MBraun inert atmosphere drybox containing either dinitrogen or argon was employed to exclude water and dioxygen. For manipulations in the drybox, all glassware was oven dried at 150 °C for a minimum of 12 h and cooled in an evacuated antechamber for a minimum of 15 minutes. Benzene, diethyl ether, dichloromethane (DCM), acetonitrile (MeCN), hexanes, pentane, toluene, and tetrahydrofuran (THF) were dried over 4 Å molecular sieves (Strem) prior to use in the drybox. When applicable, solvents were tested with a deep violet solution of sodium benzophenone ketyl in tetrahydrofuran (prepared by stirring 10 mg benzophenone in 10 mL THF with excess metallic sodium for 12 h) to confirm effective oxygen and moisture removal. Chloroform-*d*<sub>1</sub> was purchased from Cambridge Isotope Labs and stored over anhydrous potassium carbonate for employment under air. Benzene-*d*<sub>6</sub> and tetrahydrofuran-*d*<sub>8</sub> were purchased from Cambridge Isotope Labs, degassed, and stored over 4 Å molecular sieves prior to use in the drybox. Reagents potassium graphite (KC<sub>8</sub>)<sup>1</sup>, (PPh<sub>3</sub>O)<sub>2</sub>(H<sub>2</sub>O<sub>2</sub>)<sup>2</sup>, (IMes)<sub>2</sub>Pd<sup>3</sup>, and (IMes)<sub>2</sub>Pd(O<sub>2</sub>)<sup>3</sup> were synthesized according to literature protocols. Elemental iodine was sublimed prior to use and stored in a freezer with exclusion of light. Reagent 1,2-diphenylhydrazine was crystallized from slow cooling of warm diethyl ether under dinitrogen to ensure removal of trace azoarene. Hydrazine (NH<sub>2</sub>NH<sub>2</sub>), hydrazine monohydrate (NH<sub>2</sub>NH<sub>2</sub>•H<sub>2</sub>O), and 30 % aqueous hydrogen peroxide (H<sub>2</sub>O<sub>2</sub>) were purchased from Sigma-Aldrich and used as received. (<sup>EMind</sup>L)Cu(N<sub>2</sub>) (**1**) was prepared according to literature procedures<sup>4</sup>. Celite® 545 (J. T. Baker) was dried in a Schlenk flask for 24 h under dynamic vacuum while heating to at least 150 °C prior to use in a drybox. Activated alumina was dried in a Schlenk flask for 48 h under dynamic vacuum at 200 °C prior to use in a drybox. Silica gel 32-63 μ (AIC, Framingham, MA) was used as received.

## Characterization and Physical Measurements.

**NMR Spectroscopy.**  $^1\text{H}$ ,  $^{13}\text{C}\{^1\text{H}\}$ ,  $^{31}\text{P}$ , and  $^{19}\text{F}$  NMR spectra were recorded on Varian Unity/Inova 400, 500, or 600 MHz spectrometers.  $^1\text{H}$  and  $^{13}\text{C}\{^1\text{H}\}$  NMR chemical shifts are reported relative to  $\text{SiMe}_4$  using the chemical shift of residual solvent peaks as reference.  $^{19}\text{F}$  NMR chemical shifts are reported relative to an external standard of boron  $\text{BF}_3(\text{OEt}_2)$  ( $\delta -153.00$  ppm).  $^{31}\text{P}$  NMR chemical shifts are referenced to an external standard of 85 %  $\text{H}_3\text{PO}_4$  ( $\delta 0.00$  ppm). Multiplicity assignments are abbreviated as follows: s = singlet, d = doublet, t = triplet, q = quartet, m = multiplet, br = broad, v. br = very broad.

**Resonance Raman Spectroscopy.** Resonance Raman measurements were collected at the Center for Nanoscale Systems (CNS) at Harvard University, a member of the National Nanotechnology Coordinated Infrastructure Network (NNCI). Raman spectra were recorded using a Horiba LabRam HR Evolution micro-Raman spectrometer featuring  $< 1\text{ cm}^{-1}$  spectral resolution and sub- $\mu\text{m}$  spatial resolution for confocal imaging. Measurements were conducted using a 532 nm excitation laser (0.028 mW) at room temperature on solid samples.

**Optical Spectroscopy.** UV/Visible/NIR spectra were recorded on a Varian Cary 50 UV/Vis spectrometer using air-free quartz cuvettes (0.10 mm path length) and a scan rate of 600 nm/min. Samples were prepared using serial dilution with volumetric glassware to obtain accurate concentrations. Extinction coefficients were determined from a minimum of three concentrations per sample and were calculated by a linear regression fit of the absorbance vs. concentration data.

**Electron Paramagnetic Resonance Spectroscopy.** EPR spectra were obtained on a Bruker EleXsys E-500 CW-EPR spectrometer. Spectra containing *ca.* 5–10 mg sample were measured as frozen toluene glasses, frozen 2-methyltetrahydrofuran glasses, and/or in solution at a microwave power of 0.6325–2 mW. Effective g-values, g-strain ( $\sigma$ ), and hyperfine coupling constants (A) were obtained from spectral simulations of  $S = 1/2$  systems using the program Easyspin.<sup>5</sup>

**Electrochemistry.** Cyclic voltammetry and differential pulse voltammetry measurements were performed with a CHI660d potentiostat using a three-electrode cell with a glassy carbon working electrode, a platinum wire as the counter electrode, and an  $\text{Ag}/\text{AgNO}_3$  reference electrode. All of the potentials are referenced to the  $[\text{Cp}_2\text{Fe}]^{+/0}$  couple. Saturated tetrabutylammonium hexafluorophosphate ( $\text{TBAPF}_6$ ) solutions of 0.2 M in tetrahydrofuran were prepared before each experiment. All measurements were conducted under a dinitrogen atmosphere. No background reaction upon addition of excess  $\text{TBAPF}_6$  in tetrahydrofuran was observed for all complexes.

**Combustion Analysis.** Elemental analysis (%CHN) was conducted at Harvard University on a PerkinElmer 2400 Series II CHNS/O Analyzer using bulk recrystallized compounds. Samples were prepared in a dinitrogen-filled drybox, which prevented satisfactory characterization on several complexes due to facile displacement with  $\text{N}_2$ . In several cases, satisfactory elemental analyses were obtained by considering the presence of solvent molecules intercalated within the unit cell as ascertained by single-crystal X-ray diffraction and  $^1\text{H}$  NMR spectroscopy.

## Metal Complex Syntheses.

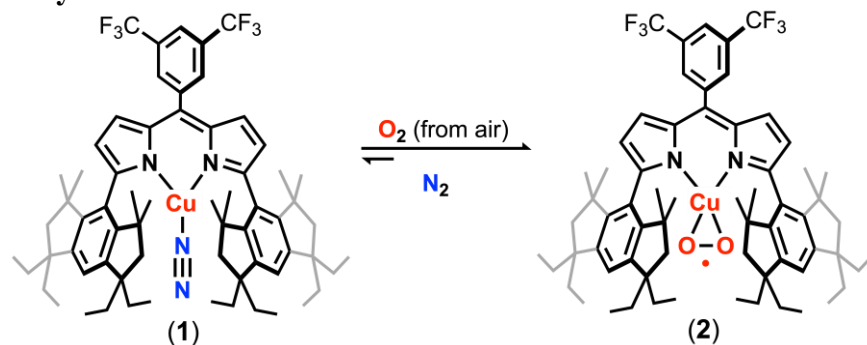

(<sup>EMind</sup>L)Cu(O<sub>2</sub>) (2). Crystalline (<sup>EMind</sup>L)Cu(N<sub>2</sub>) (1)<sup>4</sup> (0.050 g, 0.046 mmol, 1.0 equiv.) was exported from the dinitrogen-filled drybox and exposed to air, resulting in a rapid color change in the solid state from carrot-orange to Carmine red. The solid was dissolved in hexanes and agitated for 2 minutes to ensure complete oxygenation of the solution. Subsequent removal of solvent *in vacuo* to afford (<sup>EMind</sup>L)Cu(O<sub>2</sub>) (2) as an air-stable solid in quantitative yield. Large single crystals suitable for X-ray diffraction were obtained by allowing a concentrated pentane solution of **1** to stand at –10 °C under air overnight. Large single crystals (> 1 cm<sup>3</sup>) could be obtained by adding drops of benzene to the crystallization conditions. <sup>1</sup>H NMR (500 MHz, C<sub>6</sub>D<sub>6</sub>): δ 7.82 (s, 1H, fluorinated aryl C–H), 7.68 (s, 2H, fluorinated aryl C–H), 7.12 (s, 2H, EMind aryl C–H), 6.54 (d, *J* = 4.5 Hz, 2H, dipyrin C–H), 6.18 (dd, *J* = 4.2 Hz, 2H, dipyrin C–H), 1.90 (d, *J* = 3.9 Hz, 8H, EMind aliphatic C–H), 1.78 (dt, *J* = 9.3, 6.5 Hz, 8H, EMind ethyl C–H), 1.61 (apparent heptet from overlapping triplets, *J* = 6.9 Hz, 8H, EMind ethyl C–H), 1.34 (s, 12H, EMind methyl C–H), 1.32 (s, 12H, EMind methyl C–H), 0.97 (t, *J* = 7.4 Hz, 12H, EMind ethyl C–H), 0.62 (t, *J* = 7.3 Hz, 12H, EMind ethyl C–H). <sup>13</sup>C{<sup>1</sup>H} NMR (125 MHz, C<sub>6</sub>D<sub>6</sub>): δ 162.26, 148.86, 148.59, 141.90, 139.34, 134.76, 131.46, 131.19, 130.93, 130.82, 130.66, 130.41, 128.71, 128.20, 126.32, 125.46, 124.15, 122.45, 121.98, 120.99, 119.81, 52.11, 48.50, 43.93, 34.26, 32.85, 32.50, 31.66, 9.29, 8.62. <sup>19</sup>F NMR (470 MHz, C<sub>6</sub>D<sub>6</sub>): δ –62.27 (s, fluorinated aryl CF<sub>3</sub>). UV/vis (C<sub>6</sub>H<sub>14</sub>) λ<sub>max</sub>/cm<sup>–1</sup> (ε/M<sup>–1</sup> cm<sup>–1</sup>): 520 (59,000), 490 (21,700), 360 (7,000), 310 (10,000). Anal. Calc. for C<sub>65</sub>H<sub>81</sub>CuF<sub>6</sub>N<sub>2</sub>O<sub>2</sub>: C 70.98, H 7.42, N 2.55; Found: C 70.95, H 7.11, N 2.47. HRMS (ESI<sup>+</sup>): *m/z* Calc. 1098.5462 [C<sub>65</sub>H<sub>81</sub>CuF<sub>6</sub>N<sub>2</sub>O<sub>2</sub>]<sup>+</sup>, Found 1098.5493 [M]<sup>+</sup>.

*Note I:* Under an atmosphere of N<sub>2</sub> in benzene, trace formation of (<sup>EMind</sup>L)Cu(C<sub>6</sub>H<sub>6</sub>) from (<sup>EMind</sup>L)Cu(O<sub>2</sub>) (2) is observed (*ca.* 10 %), attributed to an equilibrium favoring dioxygen ligation to the copper center. Nonetheless, air exposure of this mixture affords quantitative conversion to **2**.

*Note II:* (<sup>EMind</sup>L)Cu(<sup>18</sup>O<sub>2</sub>) (2-<sup>18</sup>O<sub>2</sub>) was prepared by exposure of a degassed J. Young NMR tube containing *in situ* generated (<sup>EMind</sup>L)Cu(N<sub>2</sub>) in C<sub>6</sub>D<sub>12</sub> to an atmosphere of <sup>18</sup>O<sub>2</sub>, resulting in effervescence and a color change to red. The contents of the tube were subsequently lyophilized, and Resonance Raman measurements were subsequently conducted on the solid sample without exposure to ambient air, noting facile exchange with <sup>16</sup>O<sub>2</sub> from air, supported by independent Resonance Raman measurements. Due to facile <sup>16</sup>O<sub>2</sub>/<sup>18</sup>O<sub>2</sub> exchange under air, HRMS on 2-<sup>18</sup>O<sub>2</sub> was not conducted.

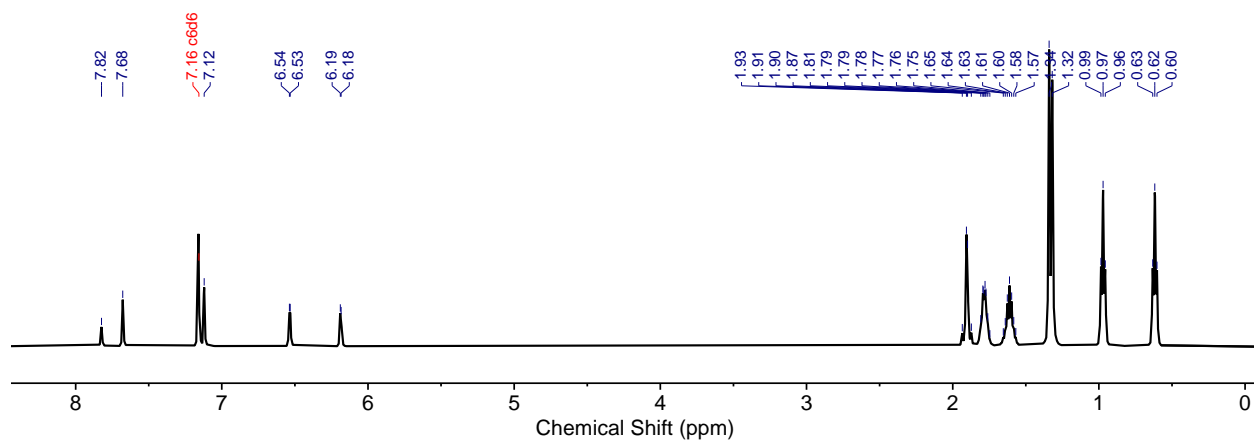

**Figure S1.**  $^1\text{H}$  NMR spectrum of  $(^{\text{EMind}}\text{L})\text{Cu}(\text{O}_2)$  (**2**), (500 MHz,  $\text{C}_6\text{D}_6$ ).

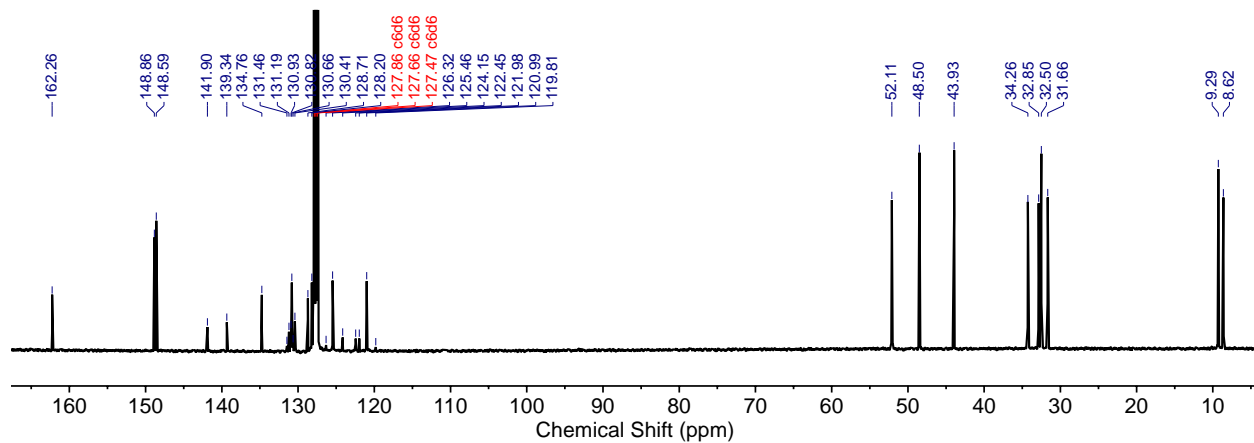

**Figure S2.**  $^{13}\text{C}\{^1\text{H}\}$  NMR spectrum of  $(^{\text{EMind}}\text{L})\text{Cu}(\text{O}_2)$  (**2**), (125 MHz,  $\text{C}_6\text{D}_6$ ).

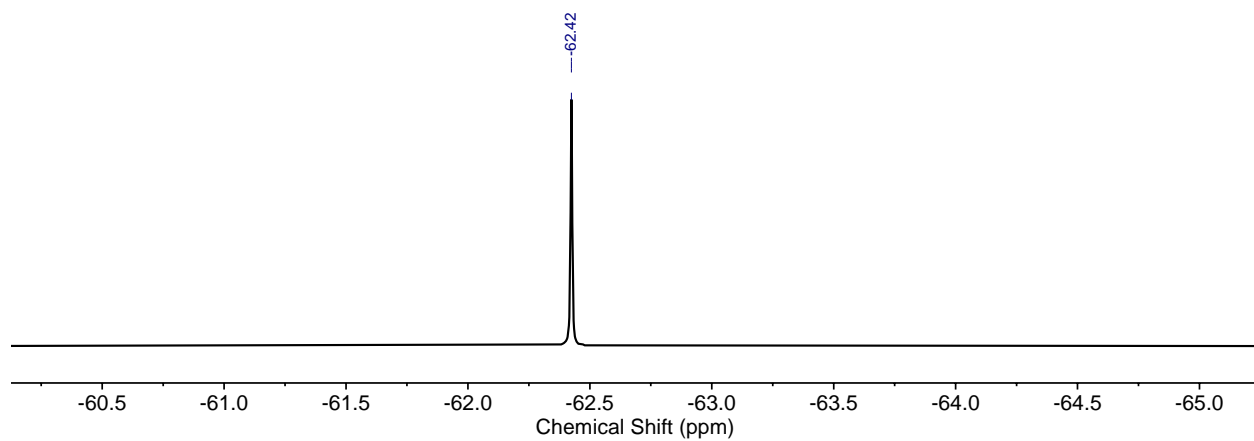

**Figure S3.**  $^{19}\text{F}$  NMR spectrum of  $(^{\text{EMind}}\text{L})\text{Cu}(\text{O}_2)$  (**2**), (470 MHz,  $\text{C}_6\text{D}_6$ ).

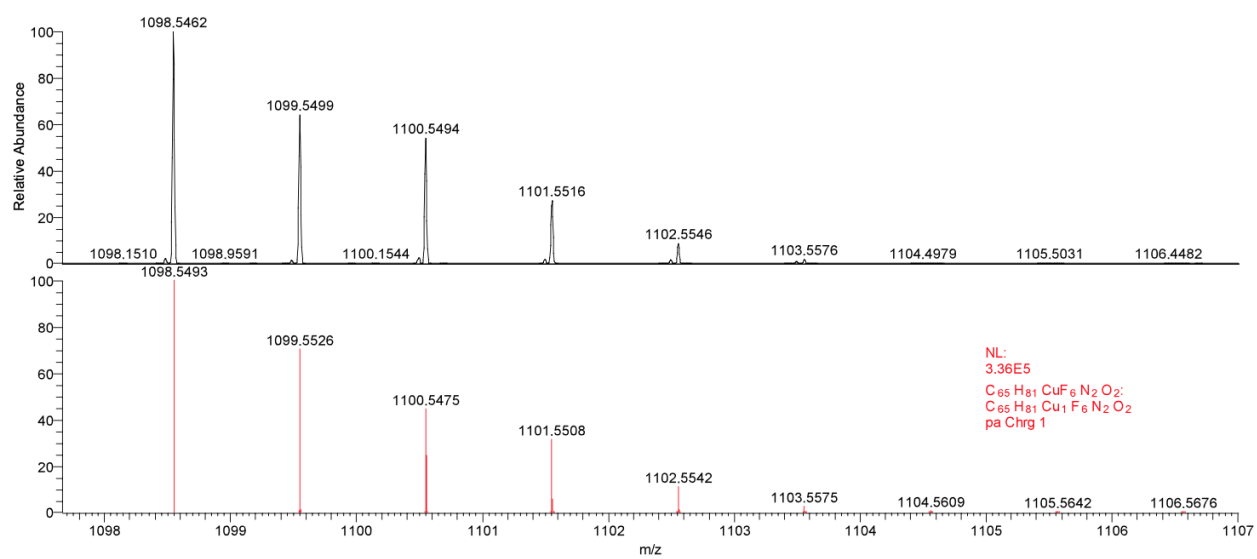

**Figure S4.** High-resolution mass spectrum of  $(^{EMind}L)Cu(O_2)$  (**2**) (*top, black*) with simulation (*bottom, red*), revealing the expected isotopic pattern.



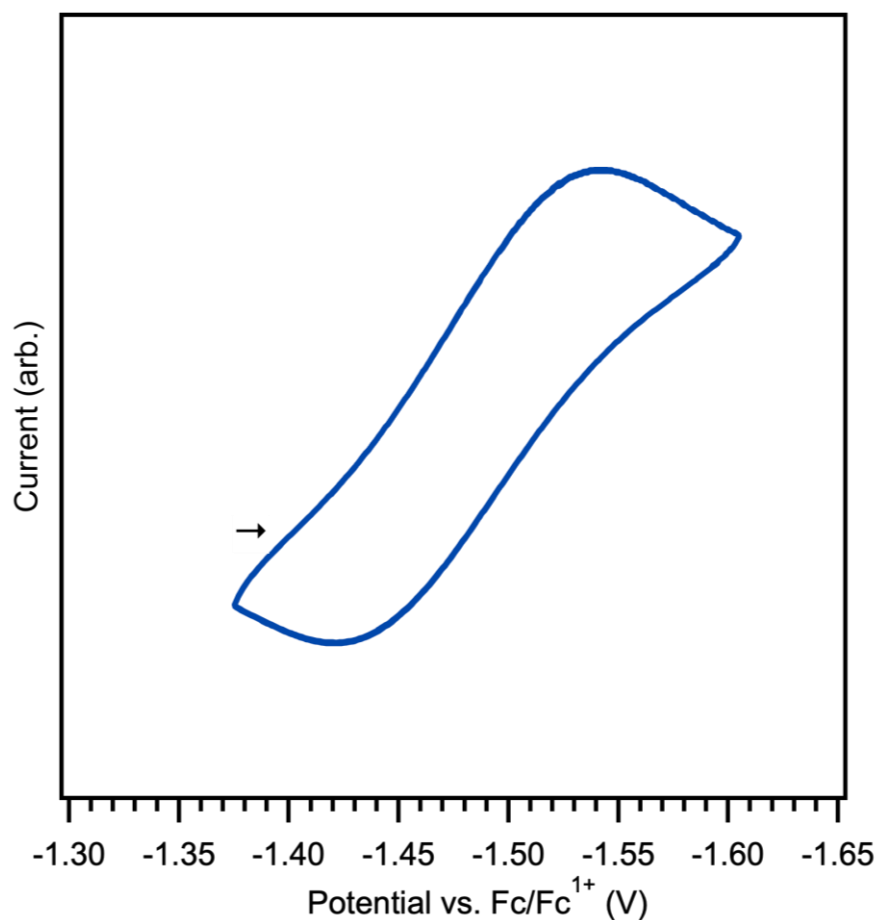

**Figure S5.** Quasi-reversible one-electron reduction of ( $E^{\text{MindL}}$ )Cu(O<sub>2</sub>) (**2**), ( $E_{1/2} = -1.48$  V vs. Fc/Fc<sup>1+</sup>) at a scan rate of 100 mV s<sup>-1</sup>. The data was recorded in 1,2-difluorobenzene under N<sub>2</sub> at a concentration of ca. 0.01 mM, with glassy carbon, Pt-wire, and Ag-wire as the working, counter, and reference electrodes, respectively. Arrows denote initial scan direction. Saturated tetrabutylammonium hexafluorophosphate ([<sup>n</sup>Bu<sub>4</sub>N][PF<sub>6</sub>]) solutions of 0.2 M in 1,2-difluorobenzene were prepared before each experiment in the presence of molecular sieves to remove trace water. No background reaction between **2** and the electrolyte was observed.

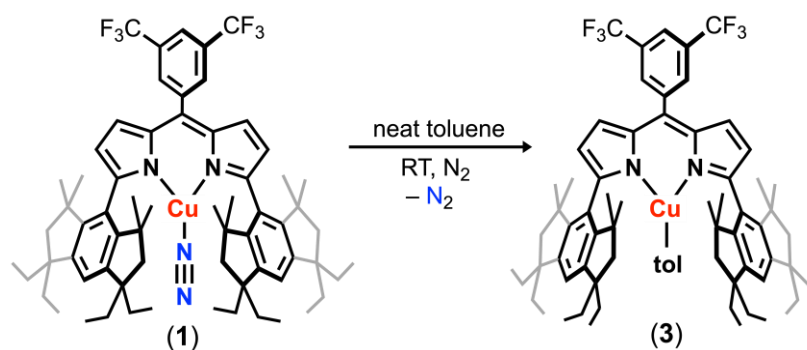

(<sup>EMind</sup>L)Cu(toluene) (**3**). In a dinitrogen-filled drybox, dissolution of (<sup>EMind</sup>L)Cu(N<sub>2</sub>) (**1**)<sup>4</sup> (0.050 g, 0.046 mmol, 1.0 equiv.) in toluene (1 mL) afforded rapid effervescence with a color change to red-orange. The mixture was agitated for 30 seconds, followed by removal of solvent *in vacuo* to afford (<sup>EMind</sup>L)Cu(toluene) (**3**) in quantitative yield. <sup>1</sup>H NMR (500 MHz, C<sub>7</sub>D<sub>8</sub>): δ 7.85 (s, 1H, fluorinated aryl C–H), 7.75 (s, 1H, fluorinated aryl C–H), 7.05 (s, 2H, EMind aryl C–H), 6.50 (d, *J* = 4.1 Hz, 2H, dipyrin C–H), 6.25 (d, *J* = 4.4 Hz, 2H, dipyrin C–H), 1.85 (s, 8H, EMind aliphatic C–H), 1.74 (dt, *J* = 9.7, 6.8 Hz, 8H, EMind ethyl C–H), 1.57 (ddp, *J* = 21.2, 14.3, 7.2 Hz, 8H, EMind ethyl C–H), 1.30 (s, 12H, EMind methyl C–H), 1.24 (s, 12H, EMind methyl C–H), 0.95 (t, *J* = 7.3 Hz, 9H, EMind ethyl C–H), 0.87 (t, *J* = 7.1 Hz, 3H, EMind ethyl C–H), 0.56 (t, *J* = 7.2 Hz, 12H, EMind ethyl C–H). <sup>13</sup>C{<sup>1</sup>H} NMR (100 MHz, C<sub>7</sub>D<sub>8</sub>): δ 159.48, 148.52, 148.45, 143.90, 142.98, 139.47, 137.16, 131.61, 130.98, 130.79, 130.65, 130.32, 130.04, 127.83, 127.59, 127.35, 124.97, 124.73, 124.49, 122.17, 121.27, 120.23, 119.45, 54.19, 47.77, 43.92, 34.20, 32.48, 32.26, 31.53, 22.46, 13.94, 9.06, 9.02. <sup>19</sup>F NMR (470 MHz, C<sub>7</sub>D<sub>8</sub>): δ –62.08 (s, fluorinated aryl CF<sub>3</sub>). A satisfactory elemental analysis of **3** could not be obtained due to the instability of the complex in the absence of excess toluene under an N<sub>2</sub> atmosphere.

*Note I:* The synthesis of (<sup>EMind</sup>L)Cu(toluene) (**3**) may be performed in air by dissolution of (<sup>EMind</sup>L)Cu(O<sub>2</sub>) (**2**) in neat toluene, as confirmed by multinuclear NMR spectroscopy. Nonetheless, we note that removal of excess toluene in the presence of trace dioxygen re-affords majority formation of **2**.

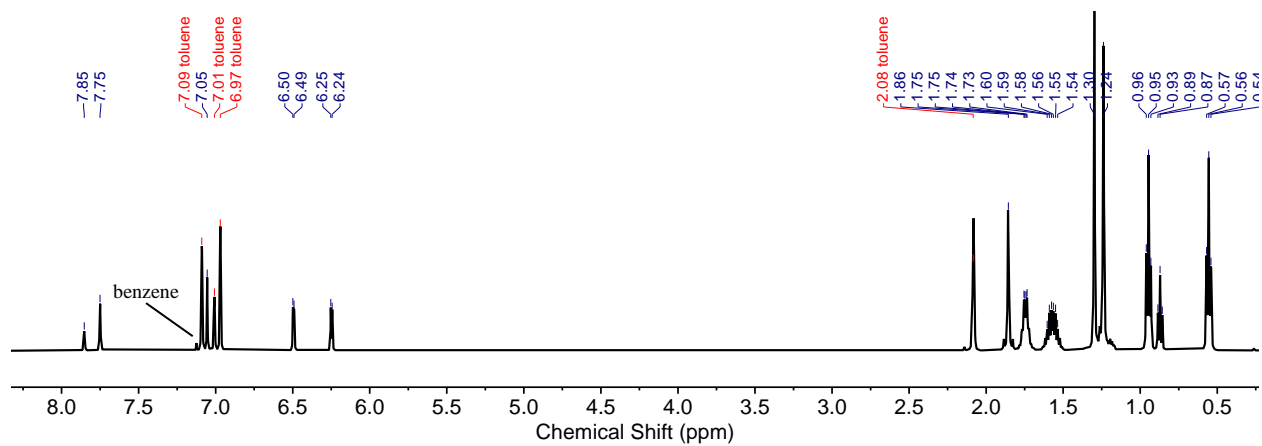

**Figure S6.**  $^1\text{H}$  NMR spectrum of  $(^{\text{EMind}}\text{L})\text{Cu}(\text{toluene})$  (**3**), (500 MHz,  $\text{C}_6\text{D}_6$ ).

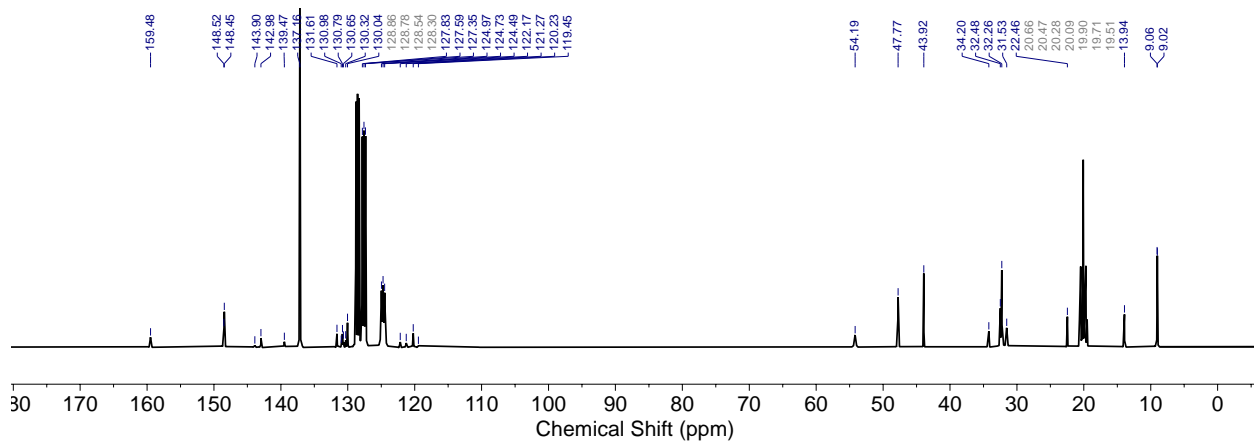

**Figure S7.**  $^{13}\text{C}\{^1\text{H}\}$  NMR spectrum of  $(^{\text{EMind}}\text{L})\text{Cu}(\text{toluene})$  (**3**), (100 MHz,  $\text{C}_7\text{D}_8$ ).

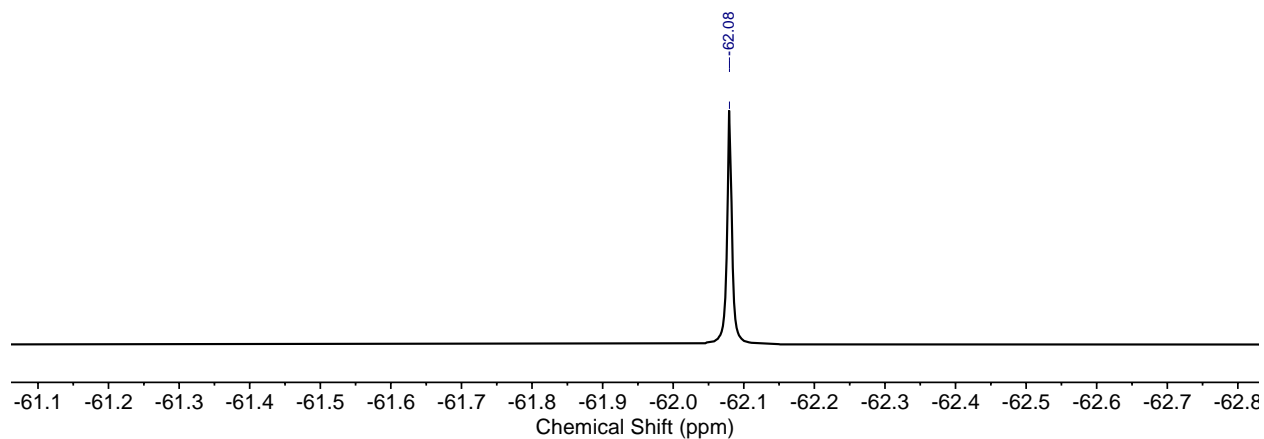

**Figure S8.**  $^{19}\text{F}$  NMR spectrum of  $(^{\text{EMind}}\text{L})\text{Cu}(\text{toluene})$  (**3**), (470 MHz,  $\text{C}_7\text{D}_8$ ).

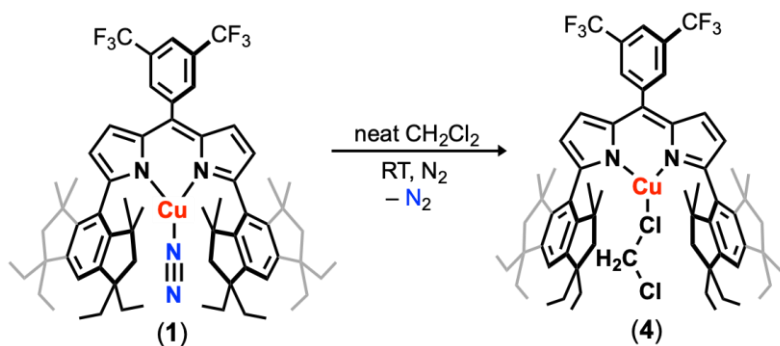

(<sup>EMindL</sup>)Cu(CH<sub>2</sub>Cl<sub>2</sub>) (**4**). In an argon-filled drybox, dissolution of (<sup>EMindL</sup>)Cu(N<sub>2</sub>) (**1**)<sup>4</sup> (0.050 g, 0.046 mmol, 1.0 equiv.) into dichloromethane (1 mL) afforded rapid effervescence with a color change to orange-red. The mixture was physically agitated for 30 seconds, followed by removal of solvent *in vacuo* to afford (<sup>EMindL</sup>)Cu(CH<sub>2</sub>Cl<sub>2</sub>) (**5**) in quantitative yield. Single crystals suitable for X-ray diffraction were obtained by reverse vapor diffusion of a dilute 100:1 pentane/dichloromethane solution of **4** into hexamethyldisiloxane at -35 °C under Ar over 7 days. <sup>1</sup>H NMR (500 MHz, CD<sub>2</sub>Cl<sub>2</sub>): δ 8.09 (s, 2H, fluorinated aryl C-H), 8.03 (s, 1H, fluorinated aryl C-H), 6.75 (br, 2H, EMind aryl C-H), 6.34 (d, *J* = 4.1 Hz, 2H, dipyrin C-H), 6.26 (d, *J* = 4.1 Hz, 2H, dipyrin C-H), 5.32 (s, 2H, dichloromethane C-H), 1.82 (s, 8H, EMind aliphatic C-H), 1.52 – 1.74 (m, 12H, EMind ethyl C-H), 1.25 – 1.34 (m, 4H, EMind ethyl C-H), 1.15 (s, 12H, EMind methyl C-H), 1.10 (s, 12H, EMind methyl C-H), 0.78 – 0.91 (24H, overlapping triplet EMind ethyl C-H). <sup>13</sup>C{<sup>1</sup>H} NMR (100 MHz, C<sub>6</sub>D<sub>6</sub>): δ 158.01, 148.44, 148.41, 142.78, 142.71, 138.54, 131.74, 130.98, 130.73, 130.40, 130.07, 129.74, 129.16, 128.33, 127.71, 124.99, 122.90, 122.28, 121.79, 120.10, 119.57, 47.88, 43.67, 34.17, 32.82, 32.76, 32.26, 31.44, 22.38, 13.85, 9.03, 8.82. <sup>19</sup>F NMR (470 MHz, C<sub>6</sub>D<sub>6</sub>): δ -62.76 (s, fluorinated aryl CF<sub>3</sub>). A satisfactory elemental analysis of **4** could not be obtained due to the instability of the complex in the absence of excess dichloromethane under a N<sub>2</sub> atmosphere.

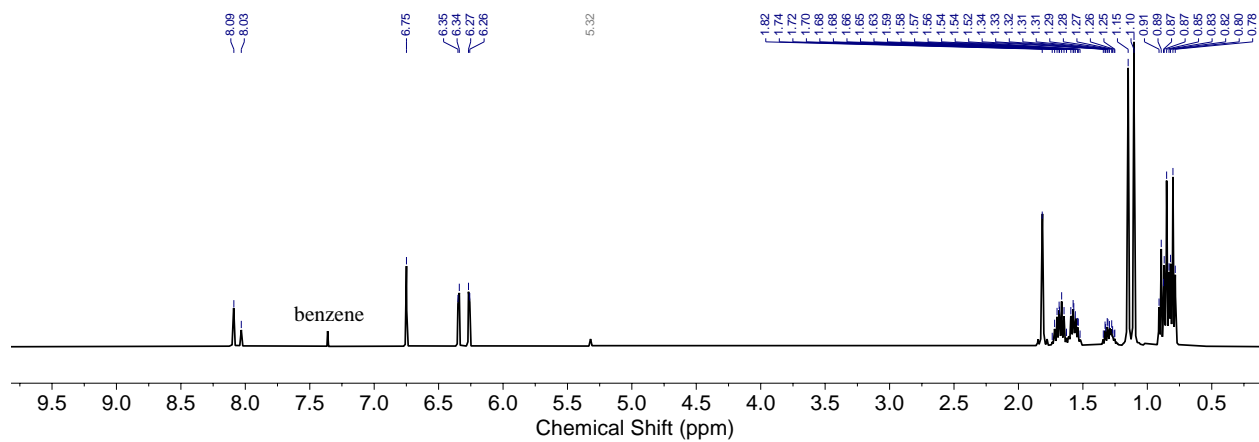

**Figure S9.**  $^1\text{H}$  NMR spectrum of  $(^{\text{EMind}}\text{L})\text{Cu}(\text{CH}_2\text{Cl}_2)$  (**4**), (500 MHz,  $\text{CD}_2\text{Cl}_2$ ).

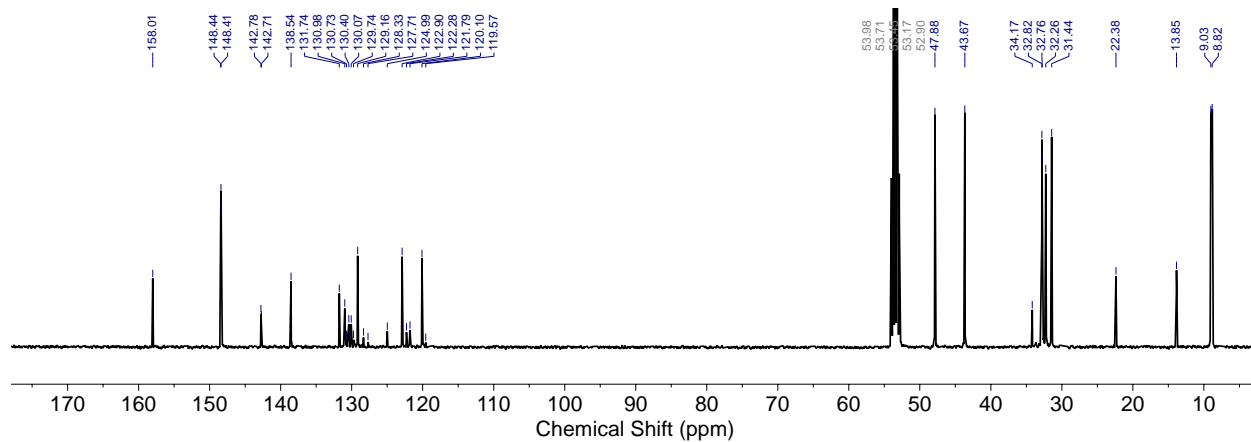

**Figure S10.**  $^{13}\text{C}\{^1\text{H}\}$  NMR spectrum of  $(^{\text{EMind}}\text{L})\text{Cu}(\text{CH}_2\text{Cl}_2)$  (**4**), (125 MHz,  $\text{CD}_2\text{Cl}_2$ ).

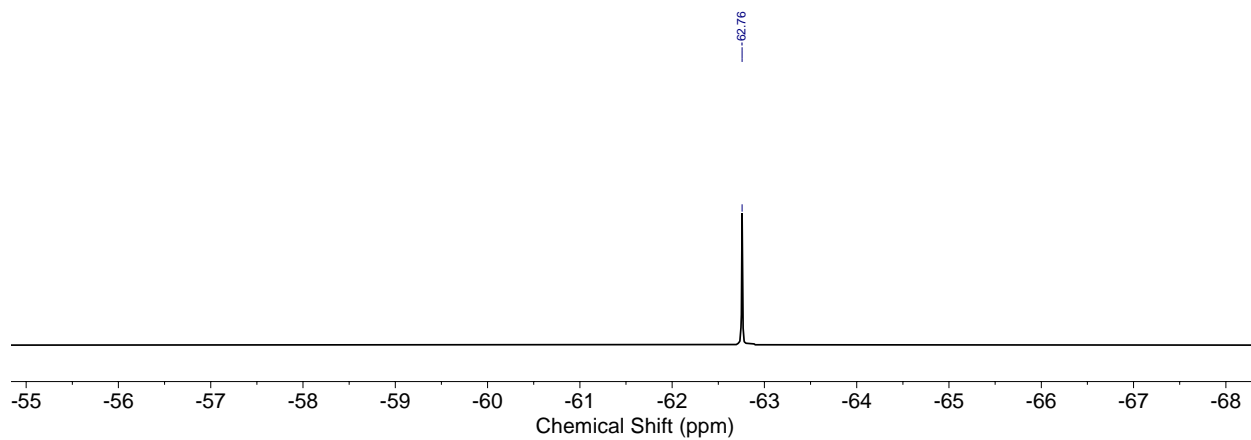

**Figure S11.**  $^{19}\text{F}$  NMR spectrum of  $(^{\text{EMind}}\text{L})\text{Cu}(\text{CH}_2\text{Cl}_2)$  (**4**), (470 MHz,  $\text{C}_6\text{D}_6$ ).

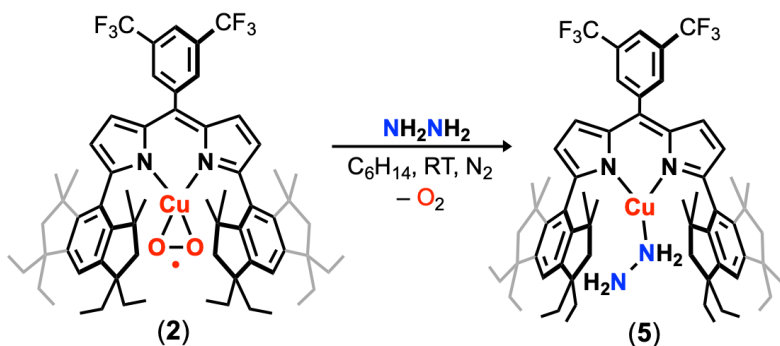

(<sup>EMind</sup>L)Cu(NH<sub>2</sub>NH<sub>2</sub>) (**5**). Under air, to a stirring solution of (<sup>EMind</sup>L)Cu(O<sub>2</sub>) (**2**) (0.050 g, 0.044 mmol, 1.0 equiv.) in hexanes (1 mL) was added excess NH<sub>2</sub>NH<sub>2</sub>(H<sub>2</sub>O) (*ca.* 3.0 equiv.), resulting in rapid effervescence and a color change to bright orange. The mixture was agitated for 30 seconds, followed by removal of solvent *in vacuo* to afford (<sup>EMind</sup>L)Cu(NH<sub>2</sub>NH<sub>2</sub>) (**5**) in quantitative yield. Single crystals suitable for X-ray diffraction were obtained by allowing a concentrated pentane solution of **5** to stand at  $-35\text{ }^{\circ}\text{C}$  under N<sub>2</sub> for 24 h or at  $-10\text{ }^{\circ}\text{C}$  under air for 72 h. <sup>1</sup>H NMR (500 MHz, C<sub>6</sub>D<sub>6</sub>):  $\delta$  7.98 (s, 2H, fluorinated aryl C–H), 7.83 (s, 1H, fluorinated aryl C–H), 6.73 (s, 2H, EMind aryl C–H), 6.58 (d,  $J = 4.3$  Hz, 2H, dipyrrole C–H), 6.42 (d,  $J = 4.4$  Hz, 2H, dipyrrole C–H), 2.45 (s, 4H, hydrazine N–H), 1.71 – 1.79 (8H, overlapping singlet EMind aliphatic C–H), 1.50 – 1.68 (16H, overlapping multiplet from EMind ethyl C–H), 1.43 (s, 12H, EMind methyl C–H), 1.35 (s, 12H, EMind methyl C–H), 0.82 (t,  $J = 7.3$  Hz, 12H, EMind ethyl C–H), 0.76 (t,  $J = 7.3$  Hz, 12H, EMind ethyl C–H). <sup>13</sup>C{<sup>1</sup>H} NMR (100 MHz, C<sub>6</sub>D<sub>6</sub>):  $\delta$  157.19, 149.06, 148.06, 143.26, 142.88, 138.66, 133.71, 131.01, 130.57, 130.24, 129.02, 124.91, 122.27, 122.20, 121.45, 119.17, 52.52, 48.06, 43.88, 34.12, 32.95, 32.80, 31.89, 22.40, 13.95, 9.03. <sup>19</sup>F NMR (470 MHz, C<sub>6</sub>D<sub>6</sub>):  $\delta$  –62.91 (s, fluorinated aryl CF<sub>3</sub>). Anal. Calc. for C<sub>65</sub>H<sub>85</sub>CuF<sub>6</sub>N<sub>4</sub>•C<sub>5</sub>H<sub>12</sub>: C 71.73, H 8.34, N 4.78; Found: C 72.20, H 8.28, N 5.10 (one molecule of pentane is present from bulk recrystallization and is located in the unit cell).

*Note:* The preparation of (<sup>EMind</sup>L)Cu(NH<sub>2</sub>NH<sub>2</sub>) (**5**) is similarly accomplished by treatment of (<sup>EMind</sup>L)Cu(N<sub>2</sub>) (**1**)<sup>4</sup> with excess anhydrous hydrazine in hexanes, followed by removal of solvent to afford **6** in quantitative yield.

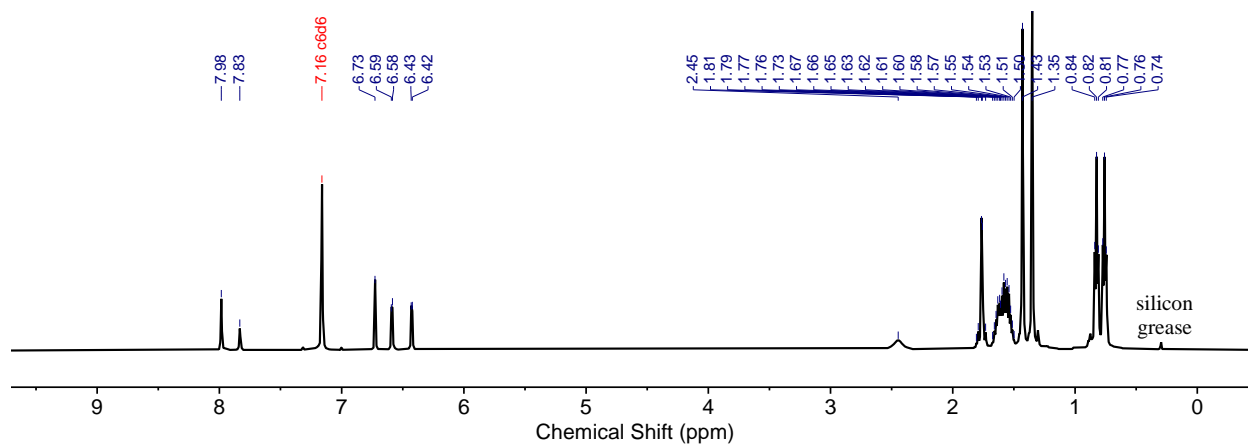

**Figure S12.**  $^1\text{H}$  NMR spectrum of  $(^{\text{EMind}}\text{L})\text{Cu}(\text{NH}_2\text{NH}_2)$  (**5**), (500 MHz,  $\text{C}_6\text{D}_6$ ).

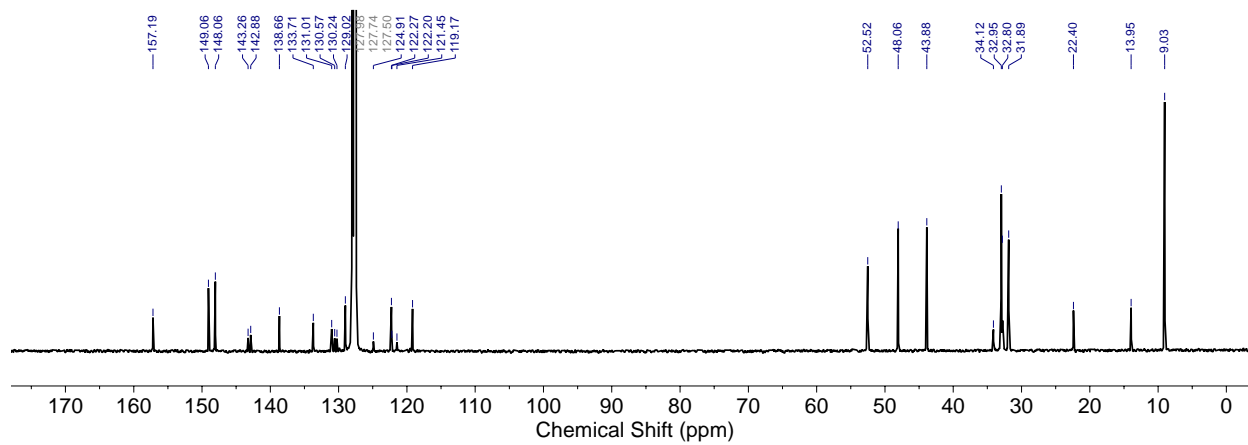

**Figure S13.**  $^{13}\text{C}\{^1\text{H}\}$  NMR spectrum of  $(^{\text{EMind}}\text{L})\text{Cu}(\text{NH}_2\text{NH}_2)$  (**5**), (100 MHz,  $\text{C}_6\text{D}_6$ ).

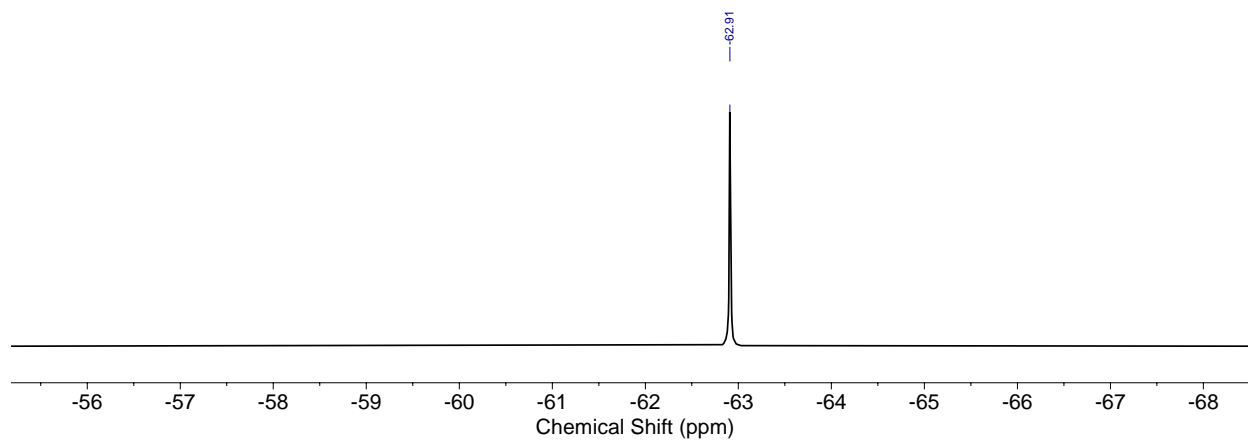

**Figure S14.**  $^{19}\text{F}$  NMR spectrum of  $(^{\text{EMind}}\text{L})\text{Cu}(\text{NH}_2\text{NH}_2)$  (**5**), (470 MHz,  $\text{C}_6\text{D}_6$ ).

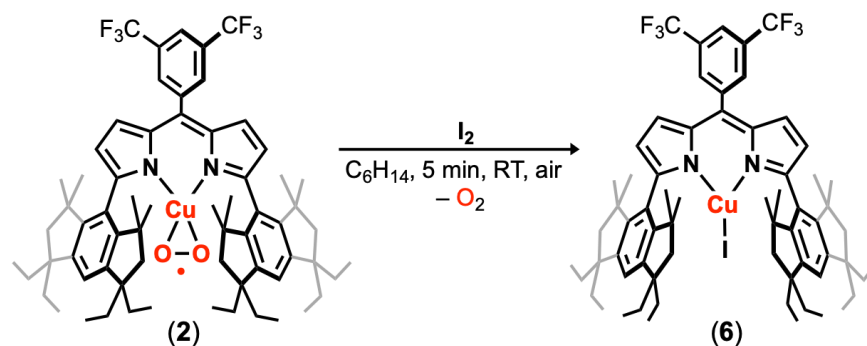

**(<sup>E</sup>MindL)CuI (6)**. Under ambient air, elemental iodine (0.028 g, 0.110 mmol, 1.0 equiv.) was added as a solid to a solution of **2** (0.120 g, 0.110 mmol, 1.0 equiv.) in hexanes (2 mL), resulting in immediate effervescence and a darkening of the solution to dark pink. The solution was stirred for five minutes, followed by removal of solvent *in vacuo*. Removal of excess elemental iodine could be conducted either through (i) prolonged heating (60 °C, 24 h) under dynamic vacuum or through (ii) lyophilization, followed by suspending the residual solid in cold acetonitrile (*ca.* 1 mL), rinsing over Celite, and eluting with warm benzene to afford (<sup>E</sup>MindL)CuI (**6**) as a brown-pink solid in essentially quantitative yield. Single crystals suitable for X-ray diffraction were obtained by allowing layering a concentrated pentane solution of **6** to stand at -35 °C for 72 h. <sup>1</sup>H NMR (500 MHz, C<sub>6</sub>D<sub>6</sub>): δ 8.41 (v. br), 8.16 (br), 3.25 (v. br), 2.63 (br), 1.79 (v. br), 1.05 (v. br), 0.69 (v. br), 0.43 (br). <sup>19</sup>F NMR (470 MHz, C<sub>6</sub>D<sub>6</sub>): -62.11. UV/vis (C<sub>6</sub>H<sub>14</sub>) λ<sub>max</sub>/cm<sup>-1</sup> (ε/M<sup>-1</sup> cm<sup>-1</sup>): 700 (2,200) 525 (62,000), 500 (20,200), 380 (3,900), 310 (8,200). Anal. Calc. for C<sub>65</sub>H<sub>81</sub>CuF<sub>6</sub>IN<sub>2</sub>•CH<sub>3</sub>CN: C 65.11, H 6.85, N 3.40; Found: C 65.43, H 6.58, N 3.71.



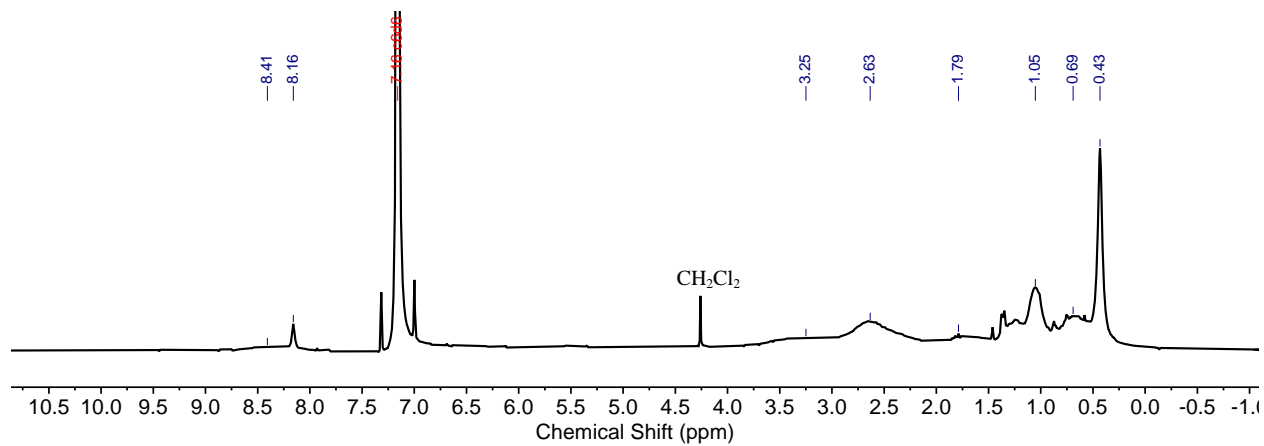

**Figure S15.**  $^1\text{H}$  NMR spectrum of  $(^{\text{EMind}}\text{L})\text{CuI}$  (**6**), (500 MHz,  $\text{C}_6\text{D}_6$ ).

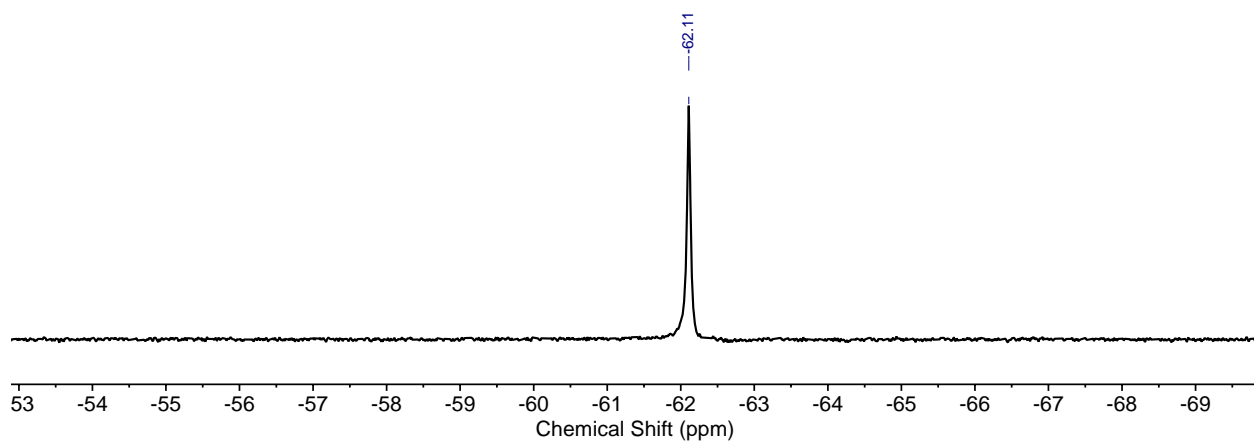

**Figure S16.**  $^{19}\text{F}$  NMR spectrum of  $(^{\text{EMind}}\text{L})\text{CuI}$  (**6**), (470 MHz,  $\text{C}_6\text{D}_6$ ).

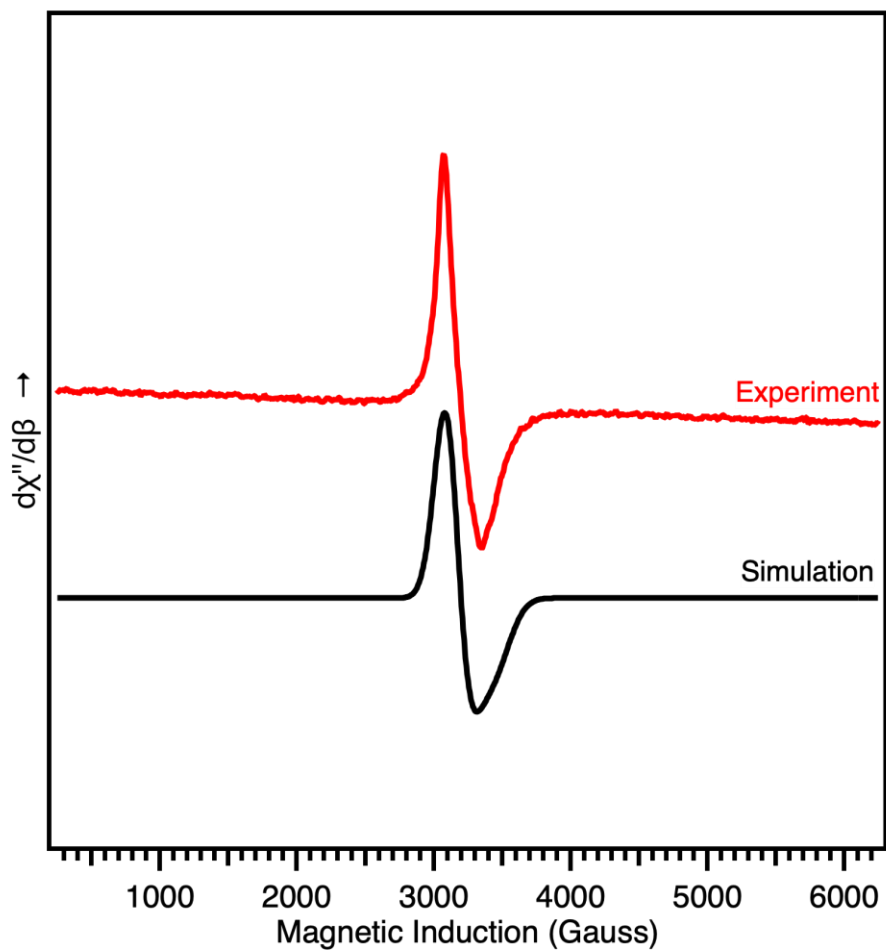

**Figure S17.** Solution toluene EPR spectrum of (<sup>EMind</sup>L)CuI (**6**) with microwave frequency of 9.857 GHz and 0.6325 mW microwave power, expanded to show an isotropic  $S = 1/2$  signal (red) simulated using Easyspin (black) with the following parameters:  $g_1 = 2.24$ ,  $\sigma_{g1} = 0.16$ ;  $g_2 = 2.04$ ,  $\sigma_{g2} = 0.17$ .

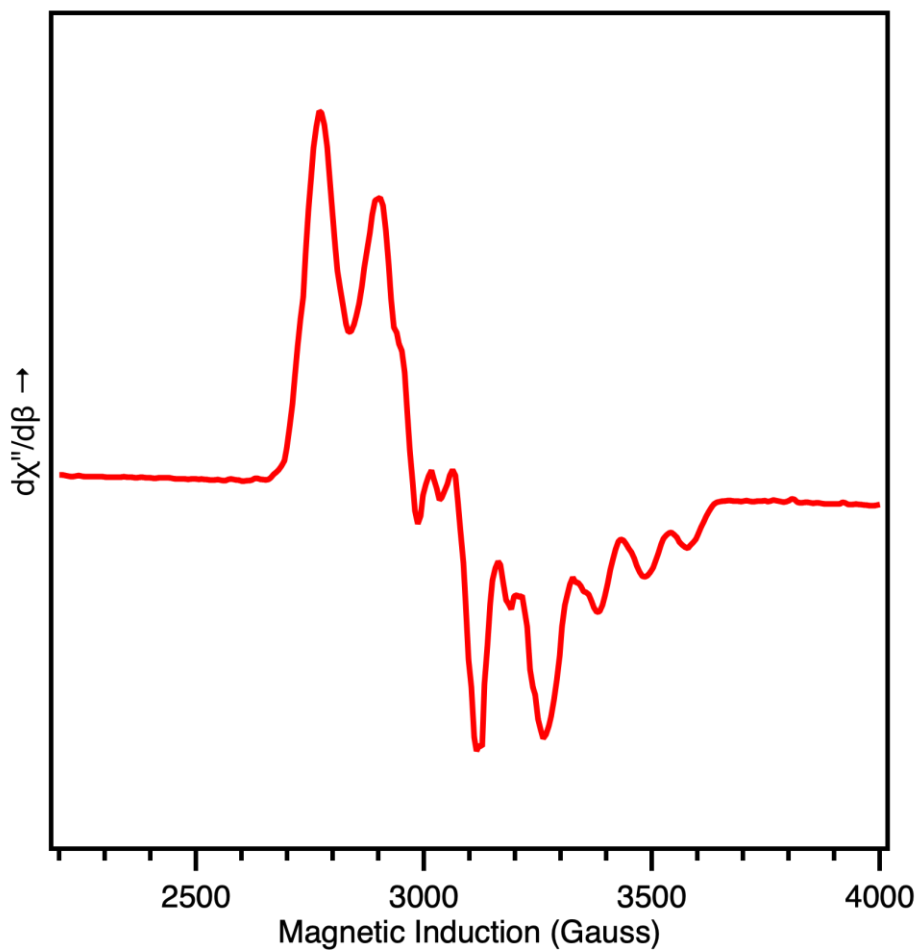

**Figure S18.** EPR spectrum of  $(^{E\text{Mind}L})\text{CuI}$  (**6**) in frozen toluene (77 K) with microwave frequency of 9.332 GHz and 0.6325 mW microwave power. The anisotropy is attributed to the heavy-iodine atom.

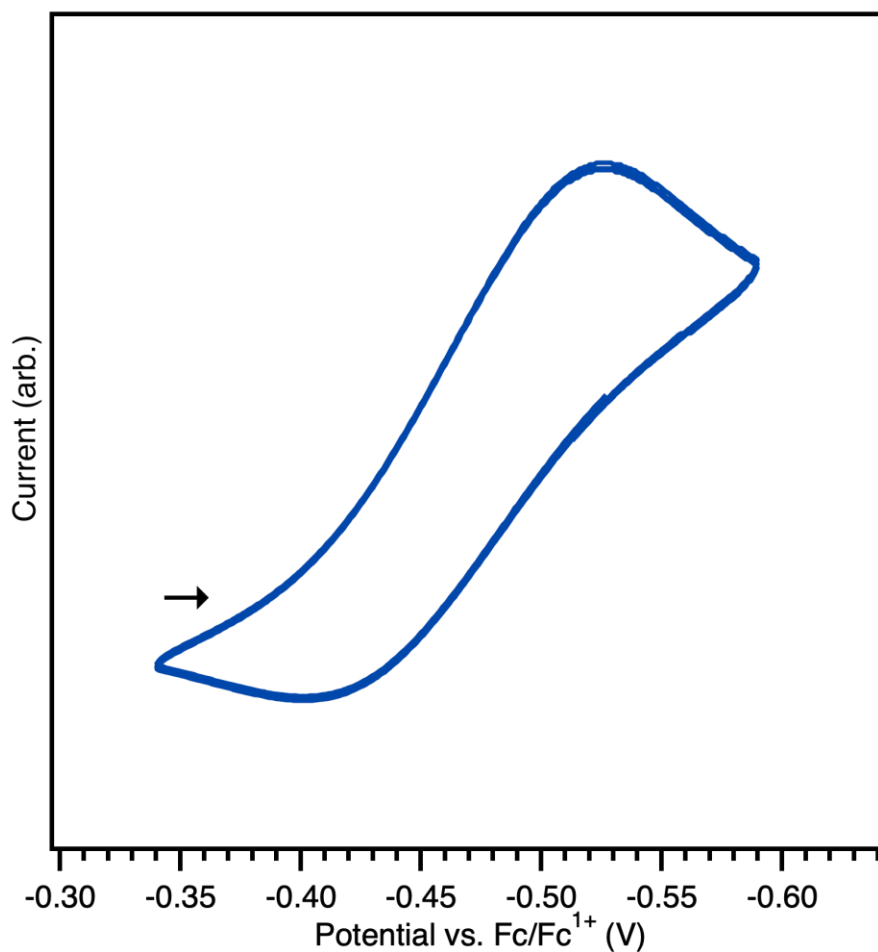

**Figure S19.** Quasi-reversible one-electron reduction of (<sup>EMindL</sup>)CuI (**6**), ( $E_{1/2} = -0.46$  V vs. Fc/Fc<sup>1+</sup>) at a scan rate of  $100 \text{ mV s}^{-1}$ . The data was recorded in 1,2-difluorobenzene at a concentration of ca. 0.01 mM, with glassy carbon, Pt-wire, and Ag-wire as the working, counter, and reference electrodes, respectively. Arrows denote initial scan direction. Saturated tetrabutylammonium hexafluorophosphate (<sup>n</sup>Bu<sub>4</sub>N][PF<sub>6</sub>]) solutions of 0.2 M in 1,2-difluorobenzene were prepared before each experiment in the presence of molecular sieves to remove trace water. No background reaction between **8** and the electrolyte was observed.

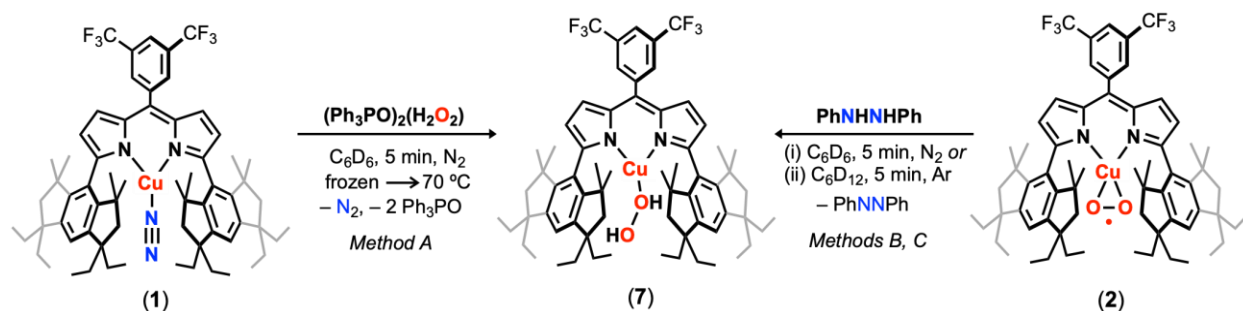

$(^{\text{EMind}}\text{L})\text{Cu}(\text{H}_2\text{O}_2)$  (**7**). The *in situ* preparation of  $(^{\text{EMind}}\text{L})\text{Cu}(\text{H}_2\text{O}_2)$  (**7**) could be achieved in three separate protocols:

**Method A.** In a dinitrogen-filled drybox, crystalline  $(^{\text{EMind}}\text{L})\text{Cu}(\text{N}_2)$  (**1**)<sup>4</sup> (0.008 g, 0.007 mmol, 1.0 equiv.) was dissolved in  $\text{C}_6\text{D}_6$  (ca. 0.4 mL), resulting in effervescence and a subtle color change to red-orange, indicative of  $(^{\text{EMind}}\text{L})\text{Cu}(\text{C}_6\text{D}_6)$ . The mixture was transferred to an NMR tube and frozen in a liquid-nitrogen chilled cold well. Upon thawing,  $(\text{Ph}_3\text{PO})_2(\text{H}_2\text{O}_2)^2$  (0.005 g, 0.008 mmol, 1.1 equiv.) was added in  $\text{C}_6\text{D}_6$  (ca. 0.3 mL), resulting in a slight darkening of the solution. Analysis by multinuclear NMR spectroscopy revealed full consumption of  $(^{\text{EMind}}\text{L})\text{Cu}(\text{C}_6\text{D}_6)$ , accompanied by formation of triphenylphosphine oxide and formation of a new Cu-containing product, assigned as  $(^{\text{EMind}}\text{L})\text{Cu}(\text{H}_2\text{O}_2)$  (**7**).  $^1\text{H}$  NMR (500 MHz,  $\text{C}_6\text{D}_6$ ):  $\delta$  7.91 (s, 1H, fluorinated aryl C–H), 7.85 (s, 1H, fluorinated aryl C–H), 7.04 (broad s, 2H, EMind aryl C–H), 6.48 (d,  $J = 4.2$  Hz, 2H, dipyrin C–H), 6.25 (d,  $J = 4.2$  Hz, 1H, dipyrin C–H), 1.56 – 1.91 (24H, overlapping singlet 8H from EMind aliphatic C–H and multiplet 16H from EMind ethyl C–H), 1.30 (s, 24H, EMind methyl C–H), 0.89 (apparent quintet from overlapping triplets,  $J = 7.4$  Hz, 24H, EMind ethyl C–H).  $^{19}\text{F}$  NMR (470 MHz,  $\text{C}_6\text{D}_6$ ):  $\delta$  –62.36 (s, fluorinated aryl  $\text{CF}_3$ ). Partial removal of triphenylphosphine could be achieved by filtering a just-thawed solution of **7** in minimal pentane. Control experiments reveal no background changes by NMR spectroscopy of  $(^{\text{EMind}}\text{L})\text{Cu}(\text{N}_2)$  upon addition of excess triphenylphosphine. Formation of  $(^{\text{EMind}}\text{L})\text{Cu}(\text{H}_2\text{O})$  was achieved through treatment of  $(^{\text{EMind}}\text{L})\text{Cu}(\text{N}_2)$  with stoichiometric water, which exhibited distinct  $^1\text{H}/^{19}\text{F}$  NMR resonances from **7** (*manuscript in preparation*).

**Method B.** In a dinitrogen-filled drybox, to a thawing solution of  $(^{\text{EMind}}\text{L})\text{Cu}(\text{O}_2)$  (**2**) in  $\text{C}_6\text{D}_6$  (containing ca. 5 %  $(^{\text{EMind}}\text{L})\text{Cu}(\text{N}_2)$  due to solution equilibration) was added stoichiometric 1,2-diphenylhydrazine. Analysis by multinuclear ( $^1\text{H}/^{19}\text{F}$ ) NMR spectroscopy reveals consumption of  $(^{\text{EMind}}\text{L})\text{Cu}(\text{O}_2)$  (**2**) and formation of both  $(^{\text{EMind}}\text{L})\text{Cu}(\text{N}_2)$  (**1**), azoarene, and a new Cu-containing product identical to that obtained from *Method A*. Control experiments reveal no background reaction of  $(^{\text{EMind}}\text{L})\text{Cu}(\text{O}_2)$  with either 1,2-diphenylhydrazine or the corresponding azoarene.

**Method C.** In an argon-filled drybox, to a solution of  $(^{\text{EMind}}\text{L})\text{Cu}(\text{O}_2)$  (**2**) in  $\text{C}_6\text{D}_{12}$  was added stoichiometric 1,2-diphenylhydrazine. Analysis by multinuclear ( $^1\text{H}/^{19}\text{F}$ ) NMR spectroscopy reveals consumption of  $(^{\text{EMind}}\text{L})\text{Cu}(\text{O}_2)$  (**2**) and formation of a new diamagnetic species, identical to the product from *Method A*. Control experiments reveal no background reaction of  $(^{\text{EMind}}\text{L})\text{Cu}(\text{O}_2)$  (**2**) with either 1,2-diphenylhydrazine or the corresponding azoarene.

*Note I* – The aliphatic resonance attributed to the EMind methyl C–H is a single resonance (24*H* integration) in  $(^{EMind}L)Cu(H_2O_2)$  (**7**), contrasting the two singlet resonances in  $(^{EMind}L)Cu(C_6D_6)$  for the same EMind methyl C–H (2 x 12*H* integration). This chemical difference indicates that **7** is a distinct diamagnetic species compared to **1**.

*Note II* – Allowing solutions of  $(^{EMind}L)Cu(H_2O_2)$  (**7**) to stand in  $C_6D_6$  over hours affords increasing amounts of  $(^{EMind}L)H$ , attributed to the acidity of  $H_2O_2$  resulting in proteo-demetalation. Attempts at crystallizing **7** under  $N_2$  as concentrated solutions of neat pentane has resulted in formation of crystalline **1**.

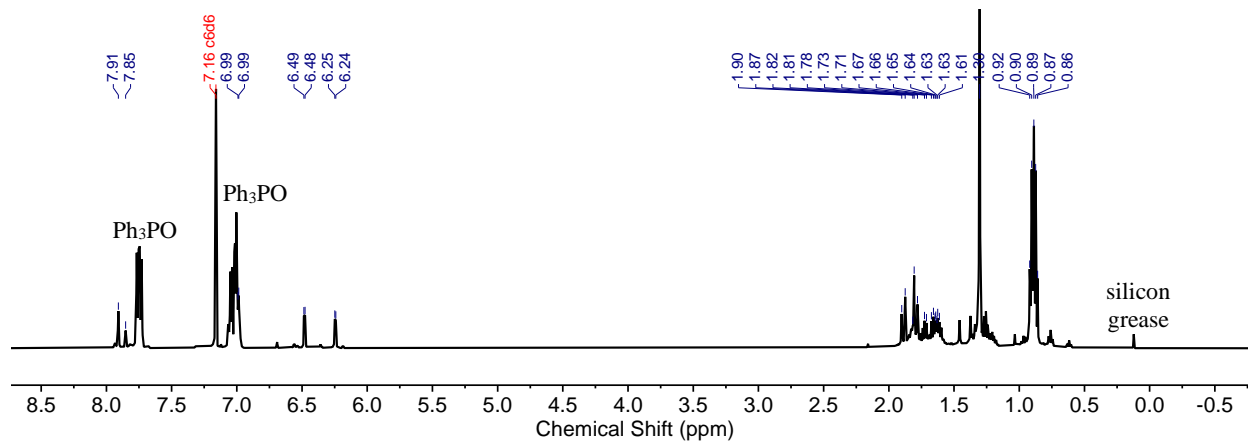

**Figure S20.**  $^1H$  NMR spectrum of *in situ* prepared  $(^{EMind}L)Cu(H_2O_2)$  (**7**), (500 MHz,  $C_6D_6$ ).

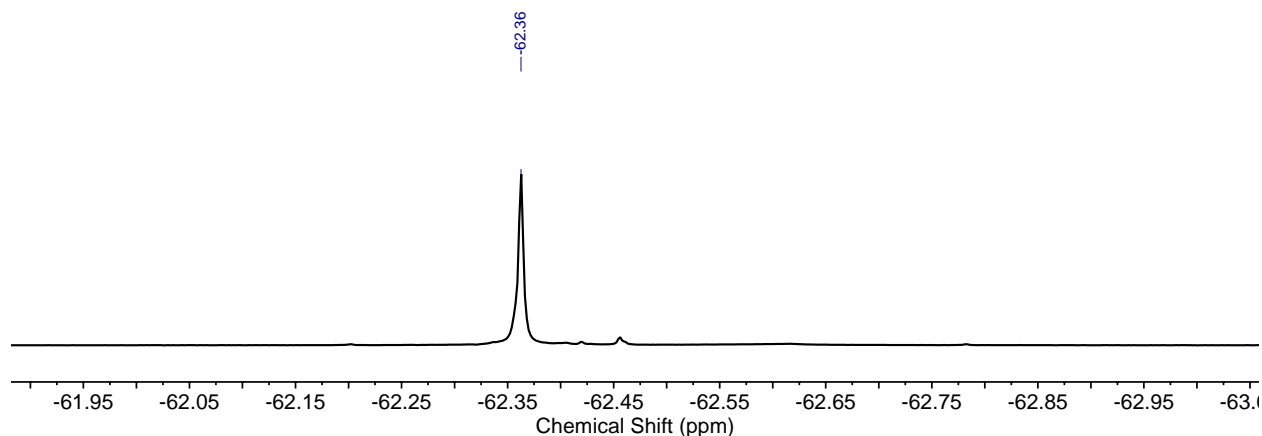

**Figure S21.**  $^{19}F$  NMR spectrum of *in situ* prepared  $(^{EMind}L)Cu(H_2O_2)$  (**7**), (470 MHz,  $C_6D_6$ ).

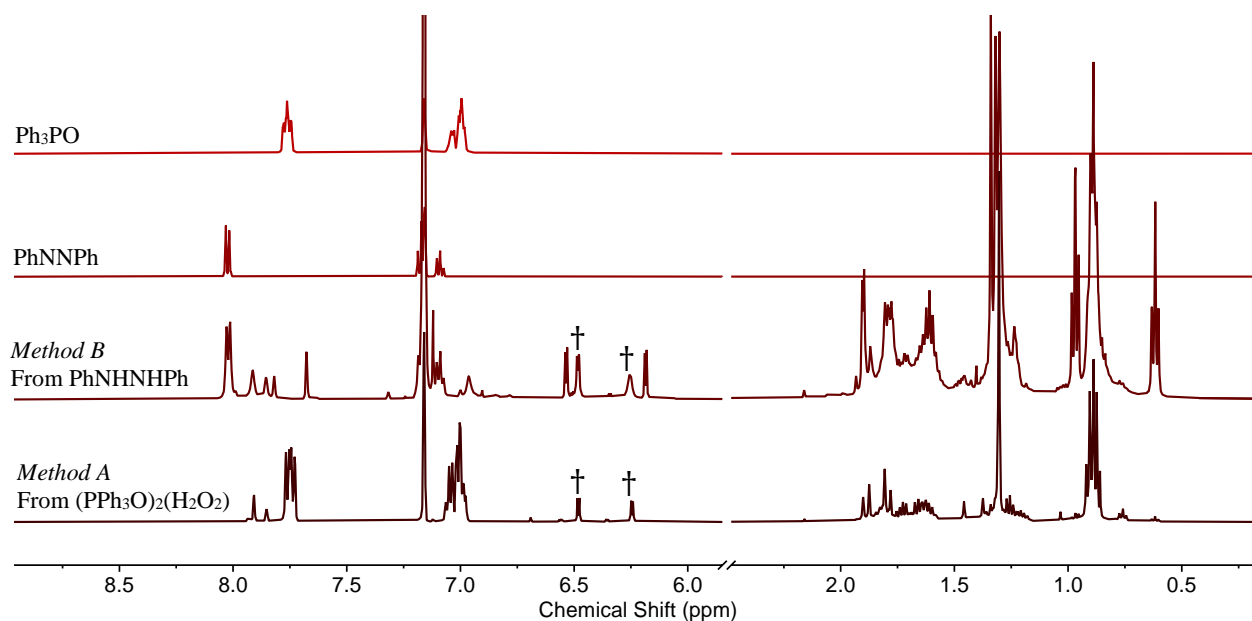

**Figure S22.**  $^1\text{H}$  NMR spectra overlay (500 MHz,  $\text{C}_6\text{D}_6$ ) of  $(^{\text{EMind}}\text{L})\text{Cu}(\text{H}_2\text{O}_2)$  (**7**) prepared by  $(\text{PPh}_3\text{O})_2(\text{H}_2\text{O}_2)$  (*bottom*) and by treatment of  $(^{\text{EMind}}\text{L})\text{Cu}(\text{O}_2)$  (**2**) with PhNHNHPh (*lower middle*, unassigned resonances correspond to unreacted **2**). Reference azoarene (*upper middle*) and  $\text{PPh}_3\text{O}$  (*top*) are presented as  $^1\text{H}$  NMR comparison spectra. Obelisk refers to diagnostic dipyrin C–H resonances.

## Supporting Spectroscopic Characterization.

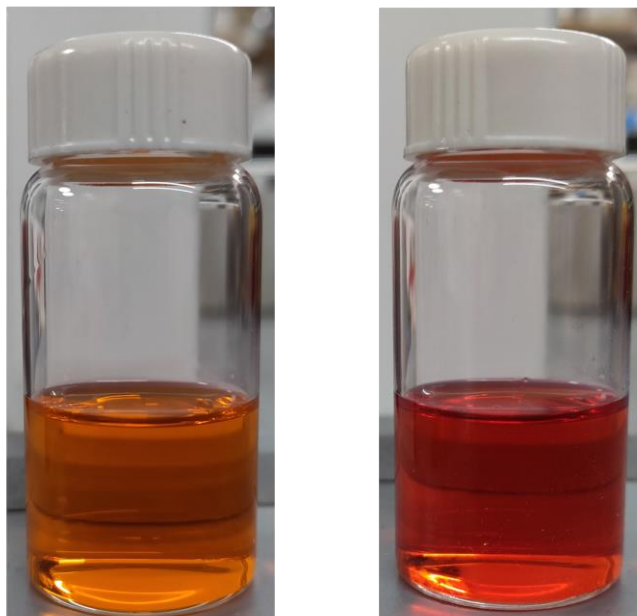

**Figure S23.** Visual comparison of  $(^{EMind}L)Cu(N_2)$  (**1**) in hexanes at 20  $\mu$ M concentration (*left, orange*) and subsequent air exposure and agitation over five seconds to yield  $(^{EMind}L)Cu(O_2)$  (**2**) in quantitative yield.

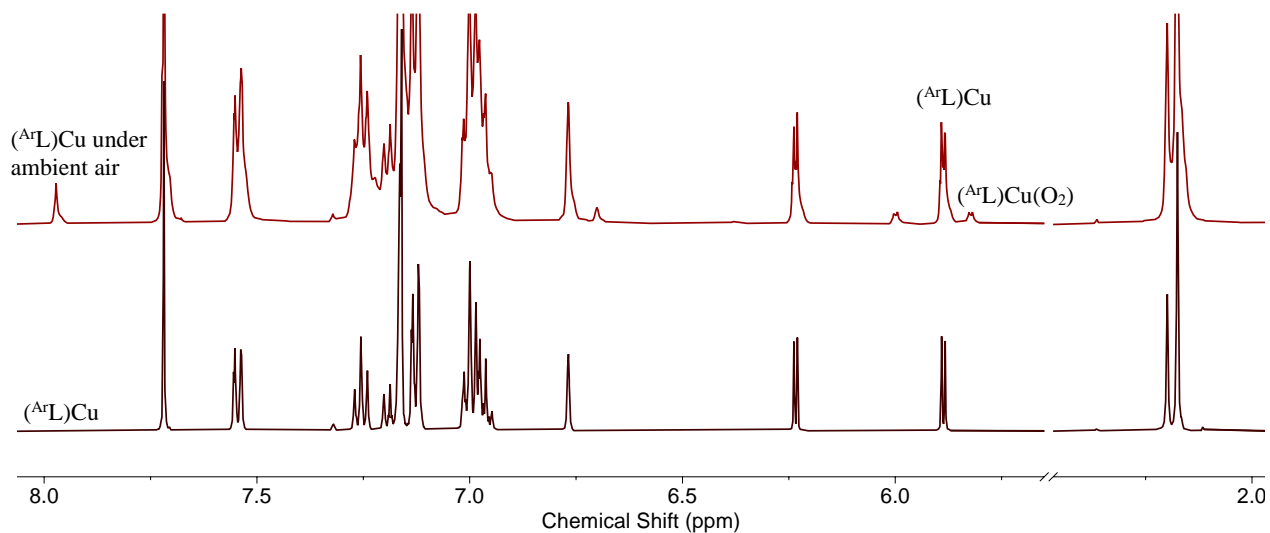

**Figure S24.** Truncated  $^1H$  NMR spectra of (500 MHz,  $C_6D_6$ ) of  $(^{Ar}L)Cu$  (*bottom, maroon*) with subsequent air exposure, yielding growth of  $(^{Ar}L)Cu(O_2)$  within five minutes prior to formation of additional paramagnetic species and  $(^{Ar}L)H$  (*top, red*).



## O<sub>2</sub> Transfer from (<sup>EMind</sup>L)Cu(O<sub>2</sub>) (**2**) to IMes<sub>2</sub>Pd.

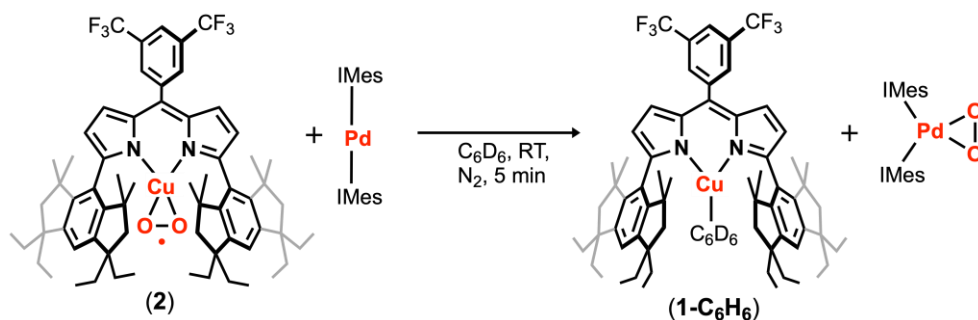

**General Procedures.** In a dinitrogen-filled drybox, a yellow solution<sup>3</sup> of IMes<sub>2</sub>Pd (0.005 g, 0.007 mmol, 1.0 equiv.) in C<sub>6</sub>D<sub>6</sub> (ca. 0.5 mL) was added to solid (<sup>EMind</sup>L)Cu(O<sub>2</sub>) (**2**) (0.006 g, 0.007 mmol, 1.0 equiv.), resulting in a Carmine red solution which changed color to orange within five minutes. The solution was then transferred to an NMR tube and checked by multinuclear (<sup>1</sup>H/<sup>19</sup>F) NMR spectroscopy (500 MHz), revealing formation of IMes<sub>2</sub>Pd(O<sub>2</sub>) and (<sup>EMind</sup>L)Cu(η<sup>2</sup>-C<sub>6</sub>D<sub>6</sub>) (**1-benzene**) as the major species. Analysis by <sup>19</sup>F NMR reveals ca. 80 % of <sup>19</sup>F active species as **1-benzene**.

**Note** – **2** should be imported into the drybox immediately prior to the reaction, noting prolonged exposure of **2** to a dinitrogen atmosphere affords trace quantities of O<sub>2</sub> dissociation.

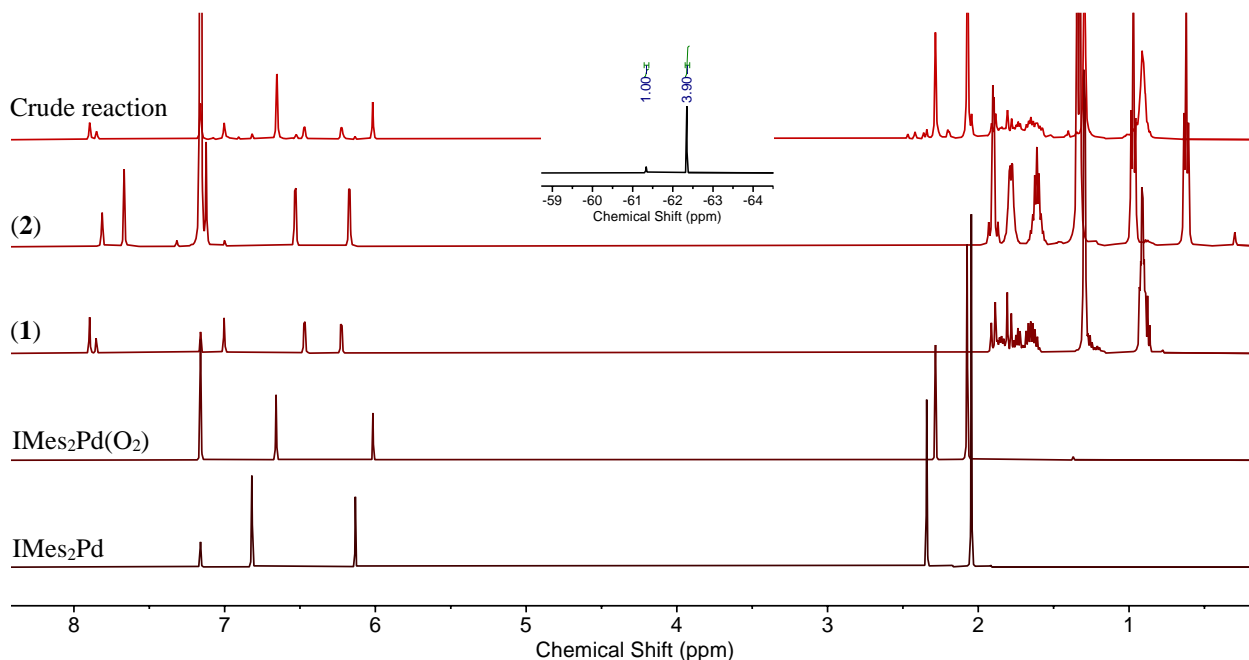

**Figure S25.** Stacked <sup>1</sup>H NMR spectra (500 MHz, C<sub>6</sub>D<sub>6</sub>) of IMes<sub>2</sub>Pd (*bottom*), IMes<sub>2</sub>Pd(O<sub>2</sub>) (*lower bottom*), (<sup>EMind</sup>L)Cu(η<sup>2</sup>-C<sub>6</sub>D<sub>6</sub>) (**1-benzene**) (*middle*), (<sup>EMind</sup>L)Cu(O<sub>2</sub>) (**2**) (*upper top*), and crude reaction mixture (*top*). A trace quantity of IMes<sub>2</sub>Pd is observed in the crude reaction mixture, attributed to release of O<sub>2</sub> from **2** under N<sub>2</sub>. Inset reveals approximately 80 % of the <sup>19</sup>F NMR active resonances are attributed to formation of **1**.

## O<sub>2</sub> Displacement through Solvent Exchange.

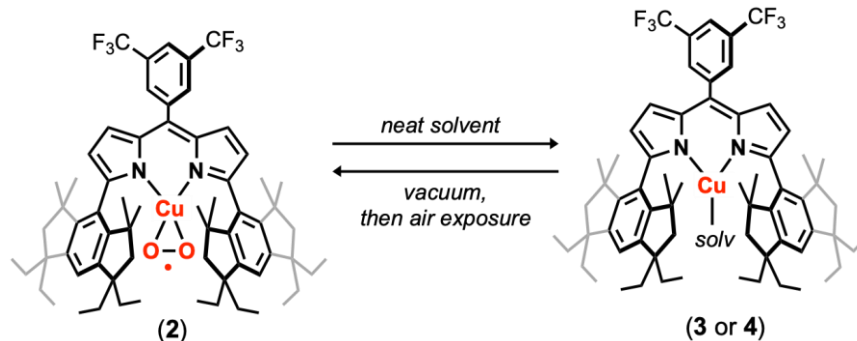

*General procedure.* Under air, (<sup>EMind</sup>L)Cu(O<sub>2</sub>) (**2**) (ca. 0.010 g, 0.010 mmol) was dissolved in the specified solvent (ca. 0.5 mL) and agitated until effervescence ceased. The solution was then transferred to an NMR tube and checked by multinuclear (<sup>1</sup>H/<sup>19</sup>F) NMR spectroscopy (500 MHz). Titration experiments of the specified solvent establish the identity of the new species as the solvent adduct with the secondary species as **2**, as the ratio of the new species to **2** was correlated with increasing equivalents of solvents. The contents of the NMR tube were subsequently transferred to a scintillation vial with removal of solvent *in vacuo* by rotary evaporation. The contents were subsequently dissolved in C<sub>6</sub>D<sub>6</sub> and analyzed by multinuclear (<sup>1</sup>H/<sup>19</sup>F) NMR spectroscopy (500 MHz). Assignments were supported by comparison to authentic samples of **2**.

*Note* – all solvents, including C<sub>6</sub>D<sub>6</sub>, were checked by <sup>1</sup>H NMR to ensure complete exclusion of CH<sub>2</sub>Cl<sub>2</sub> as a possible contaminant, noting facile partial formation of (<sup>EMind</sup>L)Cu(CH<sub>2</sub>Cl<sub>2</sub>) (**4**) in the presence of trace dichloromethane. To avoid possible contamination, the storage container of C<sub>6</sub>D<sub>6</sub> was only employed in a fume hood strictly devoid of any CH<sub>2</sub>Cl<sub>2</sub>.

**Formation of (<sup>E</sup>MindL)Cu(toluene) (3) from (<sup>E</sup>MindL)Cu(O<sub>2</sub>) (2).**

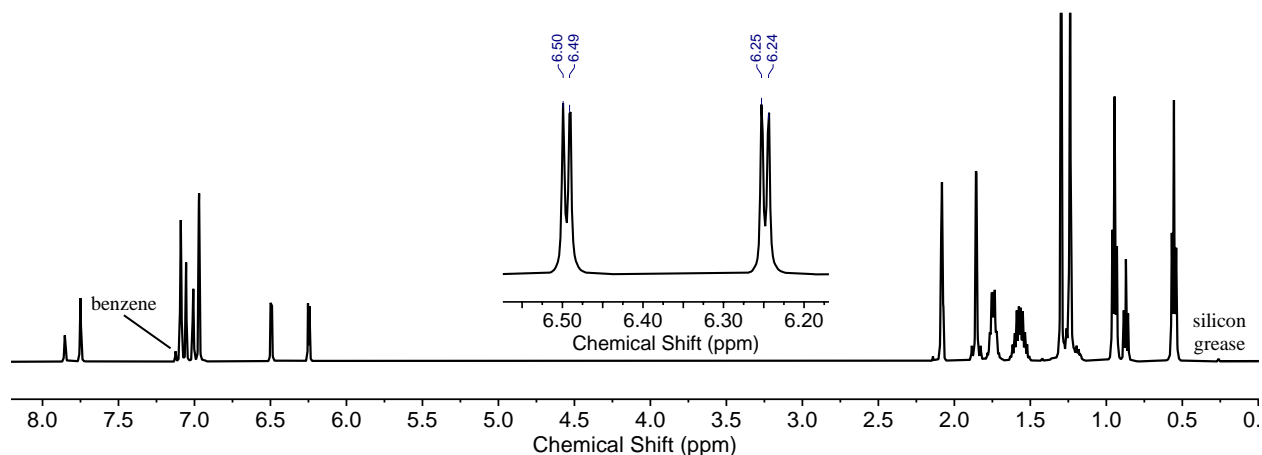

**Figure S26.** Crude <sup>1</sup>H NMR spectrum (500 MHz, C<sub>7</sub>D<sub>8</sub>) of (<sup>E</sup>MindL)Cu(toluene) (3) prepared by dissolution of (<sup>E</sup>MindL)Cu(O<sub>2</sub>) (2) in neat C<sub>7</sub>D<sub>8</sub>, depicting formation of a single species. Inset highlights the formation of a single dipyrin-containing based on the sole set of dipyrin C–H resonances.

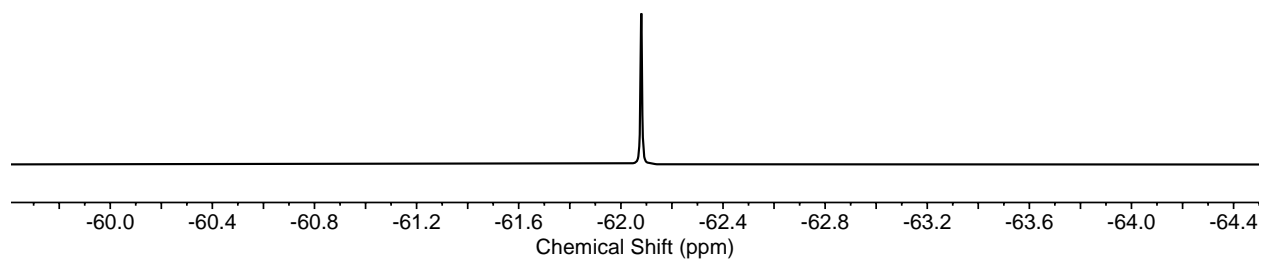

**Figure 27.** Crude <sup>19</sup>F NMR spectrum (500 MHz, C<sub>7</sub>D<sub>8</sub>) of (<sup>E</sup>MindL)Cu(toluene) (3) prepared by dissolution of (<sup>E</sup>MindL)Cu(O<sub>2</sub>) (2) in neat C<sub>7</sub>D<sub>8</sub>, depicting formation of a single species.

Reformation of  $(^{EMind}L)Cu(O_2)$  (2) from  $(^{EMind}L)Cu(\text{toluene})$  (3).

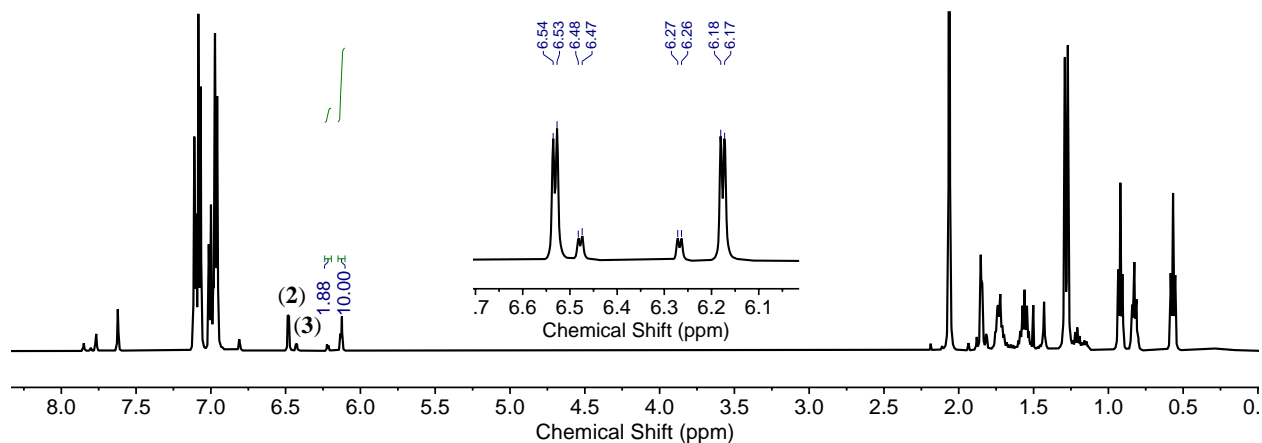

**Figure S28.** Crude  $^1H$  NMR spectrum (500 MHz,  $C_6D_6$ ) of  $(^{EMind}L)Cu(O_2)$  (2) prepared under air by removal of solvent from *in situ* prepared  $(^{EMind}L)Cu(\text{toluene})$  (3). The baseline resonances denote unconverted 3 (*ca.* 16 % by integration). Inset highlights two sets of dipyrin C–H resonances.

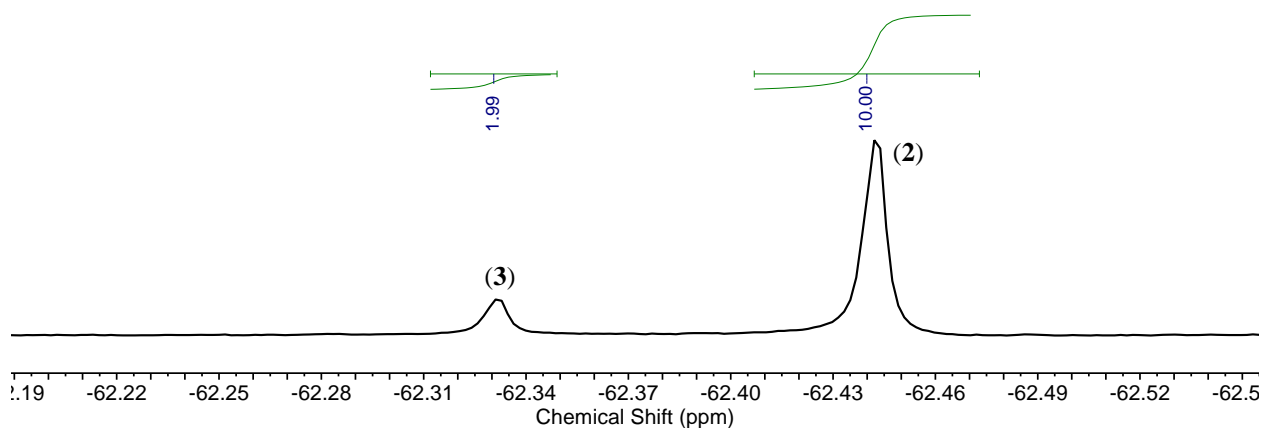

**Figure S29.** Crude  $^{19}F$  NMR spectrum (470 MHz,  $C_6D_6$ ) of  $(^{EMind}L)Cu(O_2)$  (2) prepared under air by removal of solvent from *in situ* prepared  $(^{EMind}L)Cu(\text{toluene})$  (3). The baseline resonances denote unconverted 3 (*ca.* 16 % by integration).

**Formation of  $(^{EMind}L)Cu(CH_2Cl_2)$  (**4**) from  $(^{EMind}L)Cu(O_2)$  (**2**).**

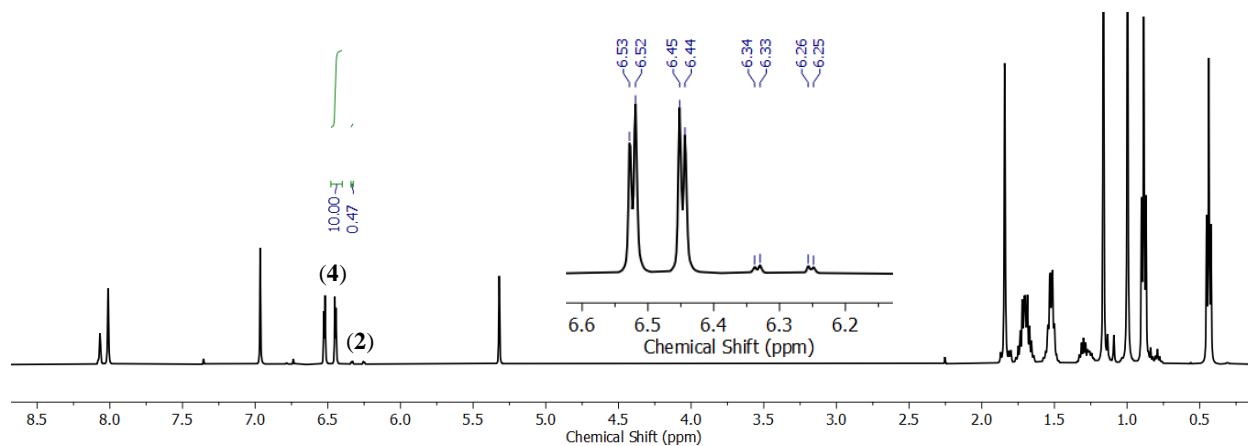

**Figure S30.** Crude  $^1H$  NMR spectrum (500 MHz,  $CD_2Cl_2$ ) of  $(^{EMind}L)Cu(CH_2Cl_2)$  (**4**) prepared by dissolution of  $(^{EMind}L)Cu(O_2)$  (**2**) in neat  $CD_2Cl_2$ . The baseline resonances denote unconverted **2** (ca. 5 % by integration). Inset highlights two sets of dipyrin C-H resonances.

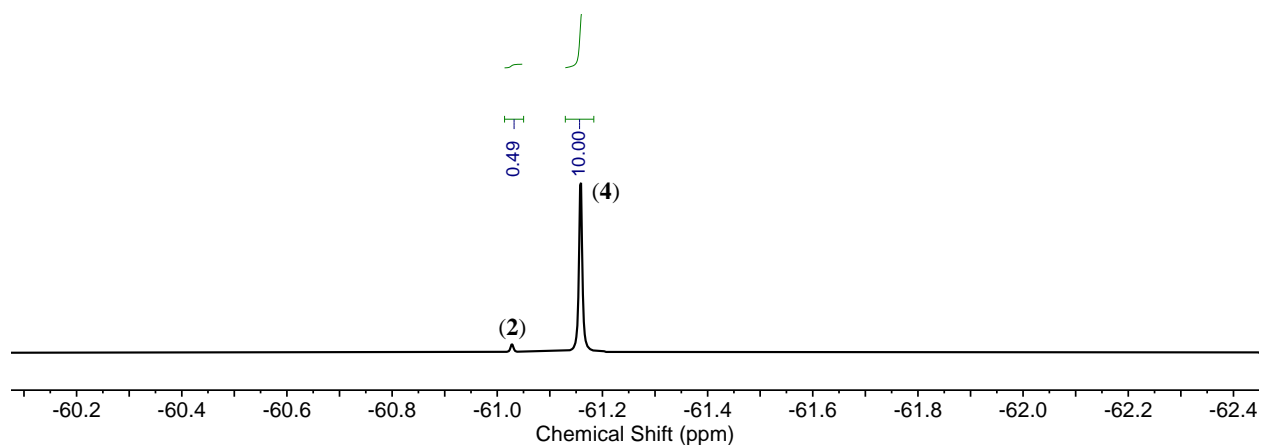

**Figure S31.** Crude  $^{19}F$  NMR spectrum (470 MHz,  $CD_2Cl_2$ ) of  $(^{EMind}L)Cu(CH_2Cl_2)$  (**4**) prepared by dissolution of  $(^{EMind}L)Cu(O_2)$  (**2**) in neat  $CD_2Cl_2$ . The baseline resonances denote unconverted **2** (ca. 5 % by integration).

**Reformation of  $(^{EMind}L)Cu(O_2)$  (**2**) from  $(^{EMind}L)Cu(CH_2Cl_2)$  (**4**).**

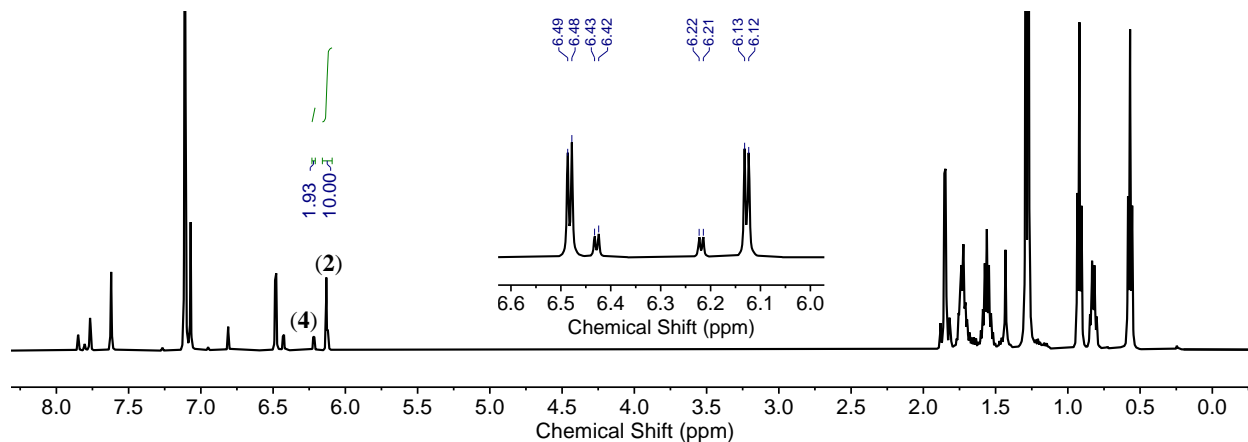

**Figure S32.** Crude  $^1H$  NMR spectrum (500 MHz,  $C_6D_6$ ) of  $(^{EMind}L)Cu(O_2)$  (**2**) prepared by removal of solvent from *in situ* prepared  $(^{EMind}L)Cu(CH_2Cl_2)$  (**4**) under air. The baseline resonances denote unconverted **4** (ca. 16 % by integration). Inset highlights two sets of dipyrin C–H resonances.

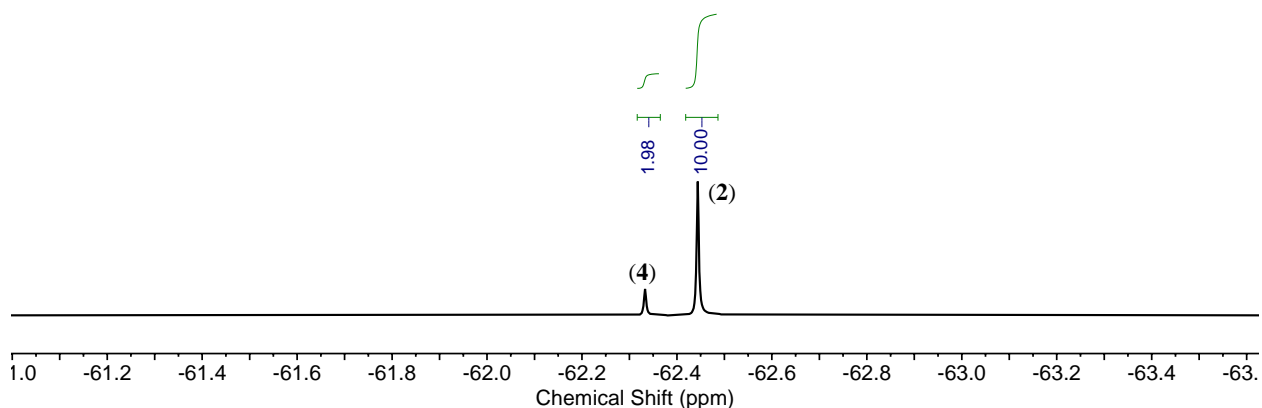

**Figure S33.** Crude  $^{19}F$  NMR spectrum (470 MHz,  $C_6D_6$ ) of  $(^{EMind}L)Cu(O_2)$  (**2**) prepared under air by removal of solvent from *in situ* prepared  $(^{EMind}L)Cu(CH_2Cl_2)$  (**4**). The baseline resonances denote unconverted **4** (ca. 17 % by integration).

**Table S1.** Summary of O<sub>2</sub> Displacement from Reagent Addition to (<sup>EMind</sup>L)Cu(O<sub>2</sub>) (**2**).

| <i>Ligand Identity</i>            | <i>Observation</i>                                  | <i>% 2 after addition</i> | <i>% 2 after evacuation</i> |
|-----------------------------------|-----------------------------------------------------|---------------------------|-----------------------------|
| Alkanes <sup>a</sup>              | No O <sub>2</sub> Displacement                      | 100                       | 100                         |
| Methanol <sup>a</sup>             | No O <sub>2</sub> Displacement                      | 100                       | 100                         |
| Benzene <sup>a</sup>              | No O <sub>2</sub> Displacement                      | 100                       | 100                         |
| Diethyl Ether <sup>a</sup>        | No O <sub>2</sub> Displacement                      | 100                       | 100                         |
| Dioxane <sup>a</sup>              | No O <sub>2</sub> Displacement                      | 100                       | 100                         |
| Hydrogen Gas <sup>d</sup>         | No O <sub>2</sub> Displacement                      | 100                       | 100                         |
| Toluene <sup>a</sup>              | Reversible O <sub>2</sub> Displacement              | 0                         | 84                          |
| Dichloromethane <sup>a</sup>      | Reversible O <sub>2</sub> Displacement              | 5                         | 83                          |
| Carbon Disulfide <sup>a</sup>     | Reversible O <sub>2</sub> Displacement              | 15                        | 80                          |
| Cyclohexene <sup>b</sup>          | Reversible O <sub>2</sub> Displacement              | 70                        | 100                         |
| Thiophene <sup>b</sup>            | Reversible O <sub>2</sub> Displacement              | 2                         | 75                          |
| Hydroxylamine <sup>b</sup>        | Reversible O <sub>2</sub> Displacement <sup>e</sup> | 0                         | 100                         |
| Chlorobenzene <sup>b</sup>        | Partial O <sub>2</sub> Displacement                 | 85                        | – <sup>f</sup>              |
| 1,2-Dichlorobenzene <sup>b</sup>  | Partial O <sub>2</sub> Displacement                 | 82                        | – <sup>f</sup>              |
| Acetone <sup>a</sup>              | Partial O <sub>2</sub> Displacement                 | 80                        | – <sup>f</sup>              |
| Dimethylsulfoxide <sup>b</sup>    | Partial O <sub>2</sub> Displacement                 | 30                        | – <sup>f</sup>              |
| Pyrazine <sup>c</sup>             | Irreversible O <sub>2</sub> Displacement            | 0                         | 0                           |
| Hydrazine <sup>c</sup>            | Irreversible O <sub>2</sub> Displacement            | 0                         | 0                           |
| Acetonitrile <sup>b</sup>         | Irreversible O <sub>2</sub> Displacement            | 0                         | 0                           |
| Carbon Monoxide <sup>d</sup>      | Irreversible O <sub>2</sub> Displacement            | 0                         | 0                           |
| Dimethylsulfide <sup>c</sup>      | Irreversible O <sub>2</sub> Displacement            | 0                         | 0                           |
| Chloroform <sup>a</sup>           | Oxidation to ( <sup>EMind</sup> L)CuCl              | 0                         | – <sup>e</sup>              |
| Carbon Tetrachloride <sup>a</sup> | Oxidation to ( <sup>EMind</sup> L)CuCl              | 0                         | – <sup>e</sup>              |
| Nitromethane <sup>b</sup>         | Partial Demetallation                               | 85                        | – <sup>e</sup>              |
| 1,1-Dichloroethane <sup>b</sup>   | Partial Demetallation                               | 80                        | – <sup>e</sup>              |
| Tetrahydrofuran <sup>a</sup>      | Decomposition upon vacuum                           | 45                        | – <sup>e</sup>              |
| Tetrachloroethylene <sup>c</sup>  | Decomposition upon vacuum                           | 70                        | – <sup>e</sup>              |
| Ammonia <sup>b</sup>              | Complete Demetallation                              | 0                         | – <sup>e</sup>              |

<sup>a</sup>Dissolution of **2** in neat reagent with conversion recorded by <sup>19</sup>F NMR spectroscopy. Removal of solvent followed by dissolution in C<sub>6</sub>D<sub>6</sub> was employed to determine regeneration of **2**. <sup>b</sup>100 equiv. of reagent employed to **2** in C<sub>6</sub>D<sub>6</sub>. <sup>c</sup>Stoichiometric reagent added to **2** in C<sub>6</sub>D<sub>6</sub>. <sup>d</sup>1 atm added to **2** in C<sub>6</sub>D<sub>6</sub>. <sup>e</sup>Removal of hydroxylamine under reduced pressure afforded partial decomposition with formation of **2** and (<sup>EMind</sup>L)H. Nonetheless, removal of hydroxylamine by slow evaporation under air under ambient conditions reafforded **2** in quantitative yield. <sup>f</sup>Not measured due to decomposition to low conversion or inability to remove excess ligating reagent.

## Reformation of $(^{\text{EMindL}}\text{Cu}(\text{O}_2))$ (**2**) from $(^{\text{EMindL}}\text{CuI})$ (**6**).

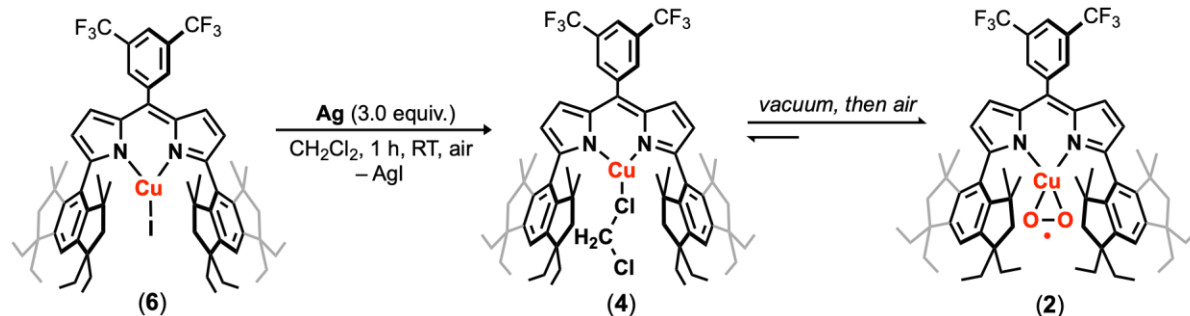

*General Procedure.* Treatment of  $(^{\text{EMindL}}\text{CuI})$  (**6**) with metallic silver in dichloromethane under air afforded  $(^{\text{EMindL}}\text{Cu}(\text{CH}_2\text{Cl}_2))$  (**4**), which could be converted into a mixture of **5** and  $(^{\text{EMindL}}\text{Cu}(\text{O}_2))$  (**2**) upon removal of excess dichloromethane.

*Note I:* Chemical reduction of  $(^{\text{EMindL}}\text{CuI})$  (**6**) with stoichiometric potassium graphite ( $\text{KC}_8$ ) under  $\text{N}_2$  in diethyl ether was able to afford  $(^{\text{EMindL}}\text{Cu}(\text{N}_2))$  (**1**) in quantitative yield following workup, which could be converted to **2** upon air exposure. Due to the necessity to conduct the reduction under  $\text{N}_2$  in this protocol based on the air-sensitivity of  $\text{KC}_8$ , the preparation of **2** through metallic silver under air is favored.



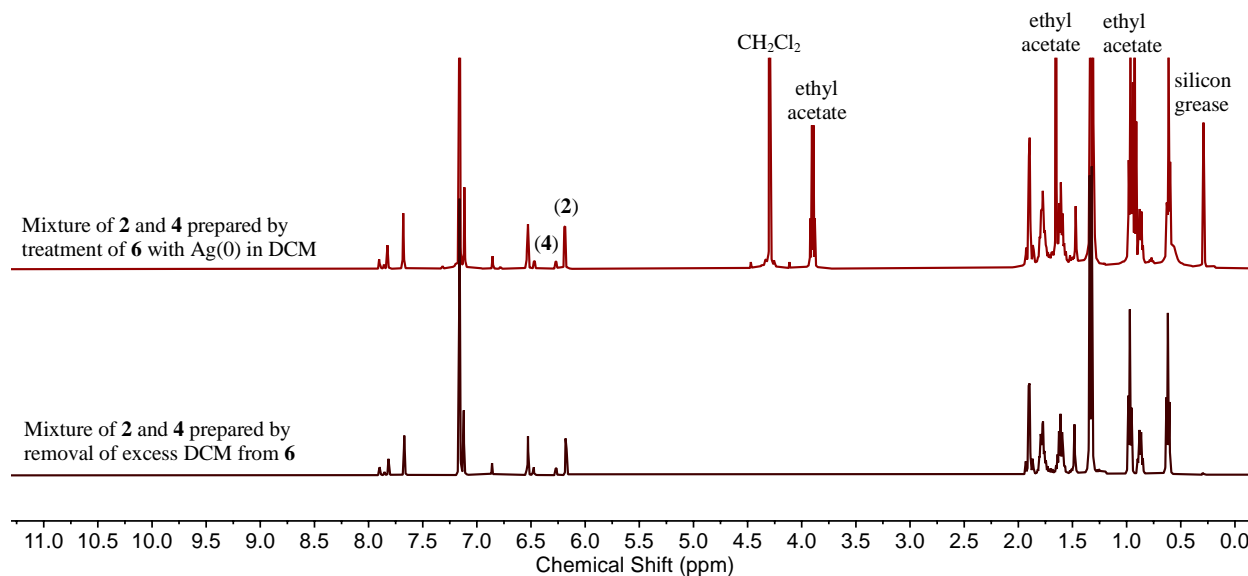

**Figure S34.** Comparison of  $^1\text{H}$  NMR spectra (500 MHz,  $\text{C}_6\text{D}_6$ ) from chemical reduction of  $(^{\text{EMind}}\text{L})\text{CuI}$  (**6**) under air with metallic silver in dichloromethane (1 h; *top, red*) to a mixture of  $(^{\text{EMind}}\text{L})\text{Cu}(\text{O}_2)$  (**2**) and  $(^{\text{EMind}}\text{L})\text{Cu}(\text{CH}_2\text{Cl}_2)$  (**4**), (*bottom, maroon*).

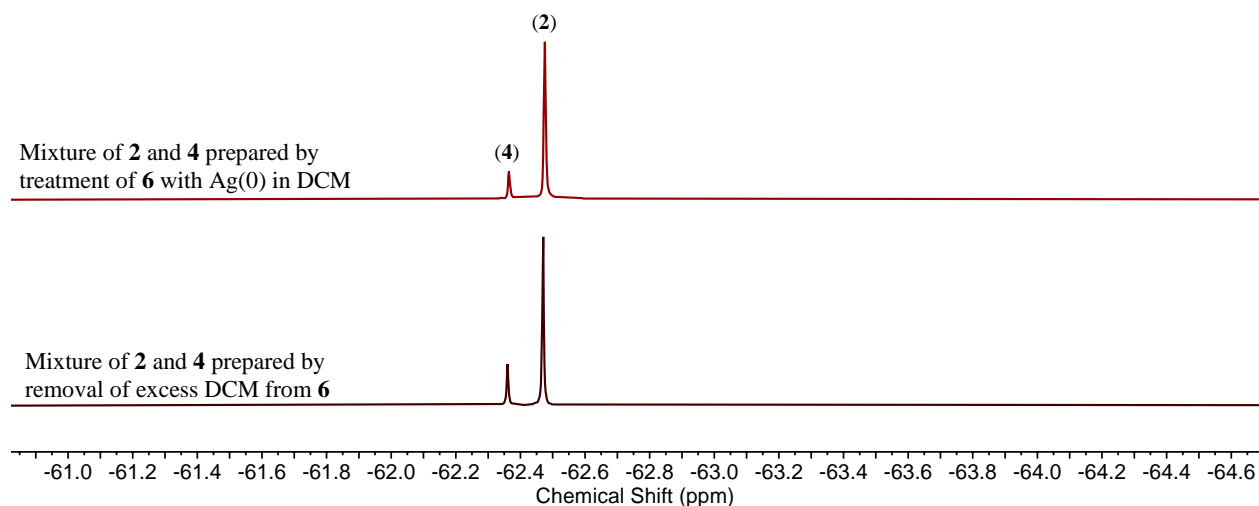

**Figure S35.** Comparison of  $^{19}\text{F}$  NMR spectra (470 MHz,  $\text{C}_6\text{D}_6$ ) from chemical reduction of  $(^{\text{EMind}}\text{L})\text{CuI}$  (**6**) under air with metallic silver in dichloromethane (1 h; *top, red*) to a mixture of  $(^{\text{EMind}}\text{L})\text{Cu}(\text{O}_2)$  (**2**) and  $(^{\text{EMind}}\text{L})\text{Cu}(\text{CH}_2\text{Cl}_2)$  (**4**), (*bottom, maroon*).

## Thermal Cycling between (<sup>E</sup>MindL)Cu(N<sub>2</sub>) (1) and (<sup>E</sup>MindL)Cu(O<sub>2</sub>) (2).

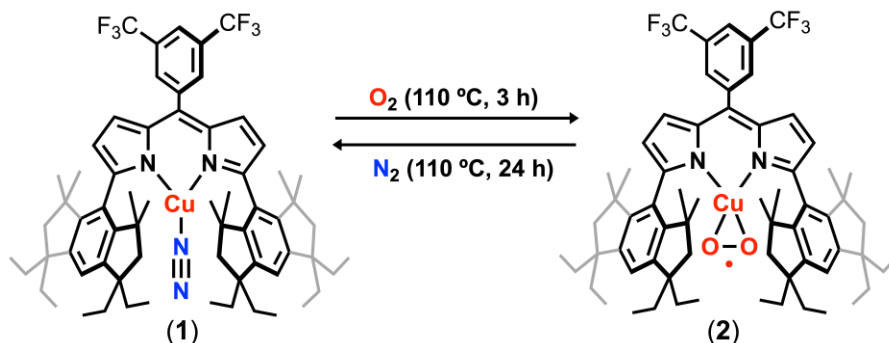

*General Procedures.* Under air, crystalline (<sup>E</sup>MindL)Cu(O<sub>2</sub>) (2) was crushed with a Teflon rod until no additional crystalline facets were apparent and the sample became a finely divided powder, noting the employment of large crystals of 2 results in slow apparent rates of gas exchange. The sample (*ca.* 10 mg) was loaded into a pre-weighed metal and loaded into a thermogravimetric analysis instrument (TGA500, TA Instruments). The initial mass was recorded, and a temperature ramp of 1 °C/min to 110 °C was set under active O<sub>2</sub> flow, followed by holding at this temperature for 24 h to ensure removal of lattice solvent. The gas stream was switched to N<sub>2</sub>, and the sample was held at 110 °C under N<sub>2</sub> flow for 24 h. The gas inlet stream was switched to O<sub>2</sub>, and the sample was held at either 110 °C (Figure S36) or 30 °C (Figure S37) under O<sub>2</sub> flow for 3 h. During gas switching, an artifact is present by TGA due to the differences in buoyancy of the inlet gas stream (see figure) in which switching from N<sub>2</sub> to O<sub>2</sub> results in an artifact mass increase, and switching from O<sub>2</sub> to N<sub>2</sub> results in an artifact mass decrease. This cycling procedure was repeated for a total of five cycles. Once the instrument temperature was set back to room temperature, the sample was subsequently removed from the instrument and analyzed by multinuclear NMR spectroscopy to assess for decomposition.

The non-quantitative conversion of 2 into 1 is attributed to slow diffusion of N<sub>2</sub> into the bulk microcrystalline sample.

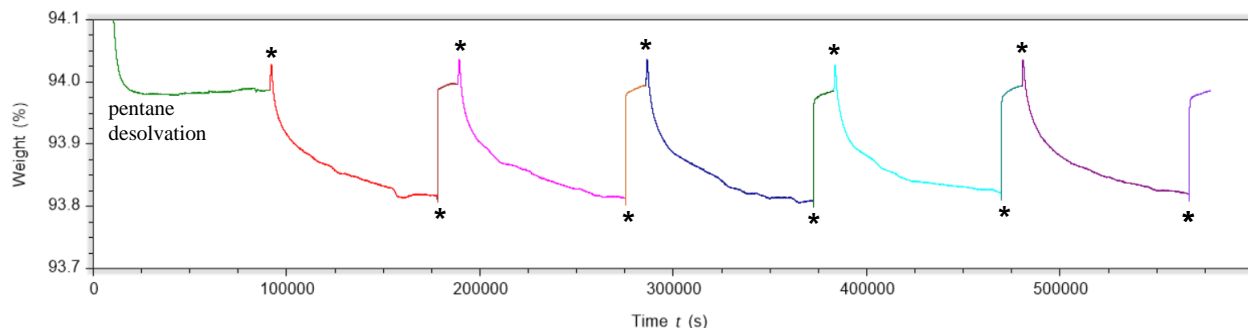

**Figure S36.** Uncorrected thermal gravimetric analysis (TGA) cycling of (<sup>E</sup>MindL)Cu(O<sub>2</sub>) (2) under alternating N<sub>2</sub>/O<sub>2</sub> cycles at a constant temperature of 110 °C. The initial mass loss prior to cycling is attributed to loss of a pentane molecule from the crystalline lattice (theoretical mass loss: 6.18 %, observed 6.02 %; difference is attributed to partial desorption of the pentane). Features marked with asterisks are instrument artifacts attributed to switching gas inlet streams.

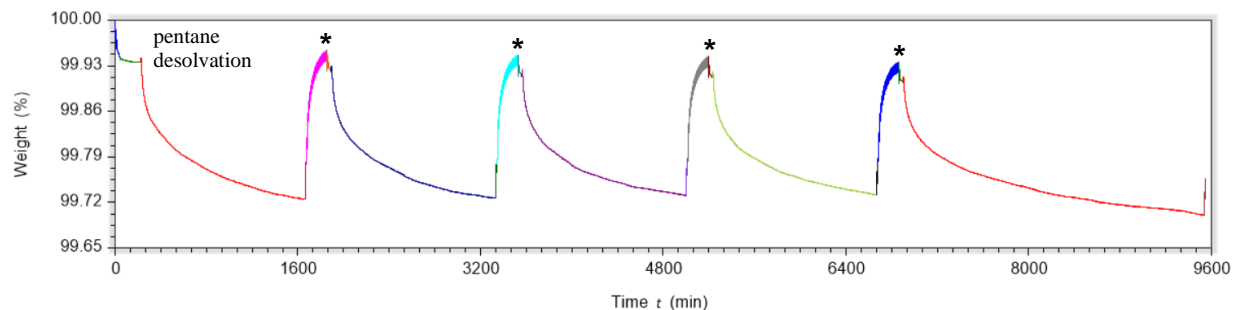

**Figure S37.** Uncorrected thermal gravimetric analysis (TGA) cycling of  $(^{EMindL})Cu(O_2)$  (**2**) under alternating  $N_2$  (110 °C)/ $O_2$  (30 °C) cycles. Pre-activation of the sample by heating at 100 °C under vacuum was conducted to remove the bulk of lattice solvent. Features marked with asterisks are instrument artifacts due to thermal pulses at 30 °C.

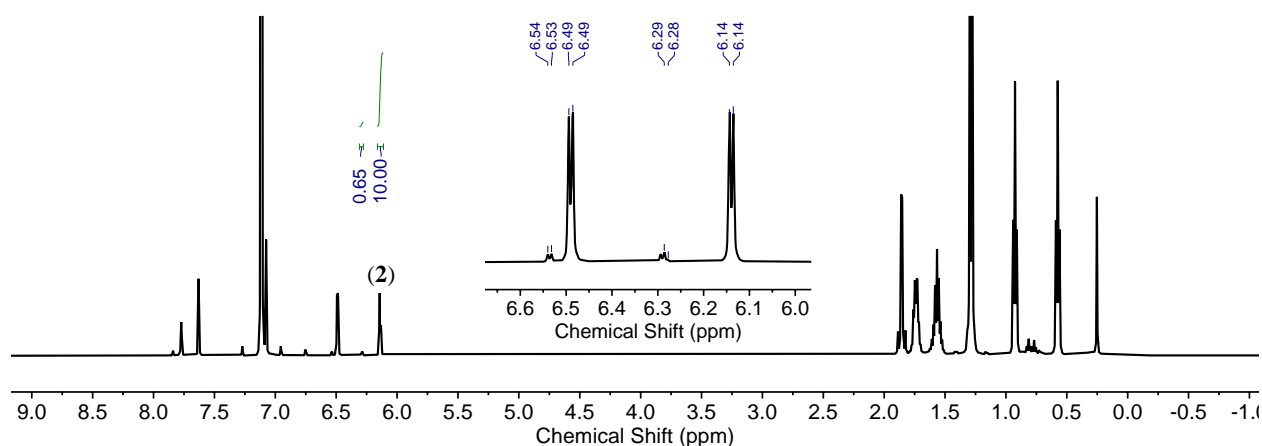

**Figure S38.**  $^1H$  NMR spectra (500 MHz,  $C_6D_6$ ) post-TGA cycling studies of  $(^{EMindL})Cu(O_2)$  (**2**), demonstrating minor formation of a diamagnetic decomposition species (ca. 5 % yield) with **2** as the dominant species. Inset highlights dipyrin C–H resonances, illustrating minor presence of a secondary species.

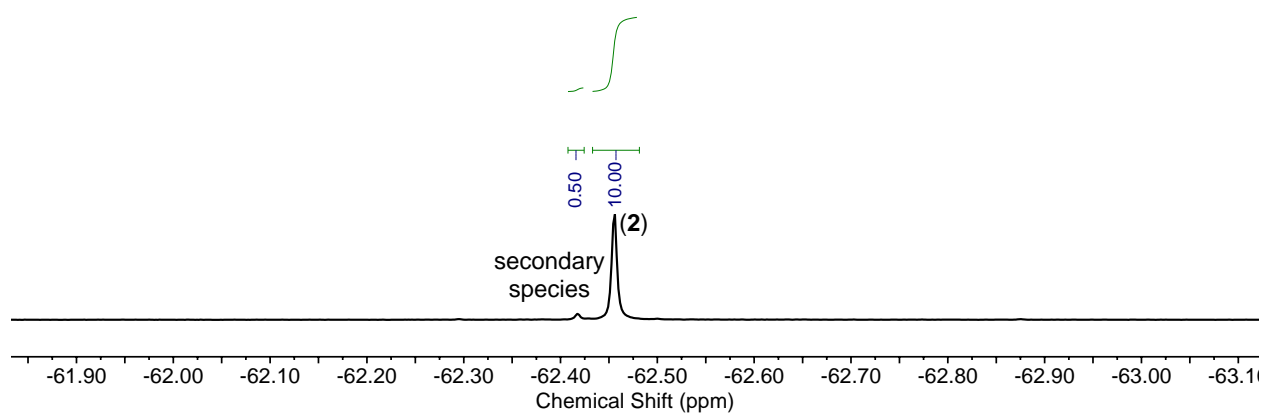

**Figure S39.**  $^{19}F$  NMR spectra (470 MHz,  $C_6D_6$ ) post-TGA cycling studies of  $(^{EMindL})Cu(O_2)$  (**2**), demonstrating minor formation of a diamagnetic decomposition species (ca. 5 % yield) as identified independently by  $^1H$  NMR spectroscopy.

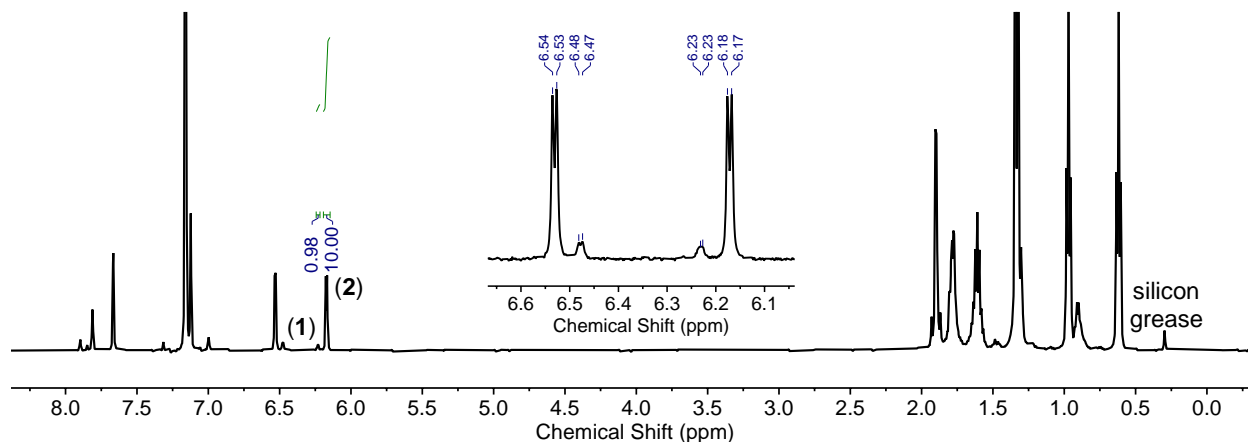

**Figure S40.**  $^1\text{H}$  NMR spectra (500 MHz,  $\text{C}_6\text{D}_6$ ) of  $(^{\text{EMindL}}\text{Cu}(\text{O}_2))$  (**2**) under  $\text{N}_2$ , showing equilibration with  $\text{N}_2$  to yield  $(^{\text{EMindL}}\text{Cu}(\text{O}_2))$  (**1**) in *ca.* 9 % yield. Inset depicts dipyrin C–H resonances for **1** and **2**.

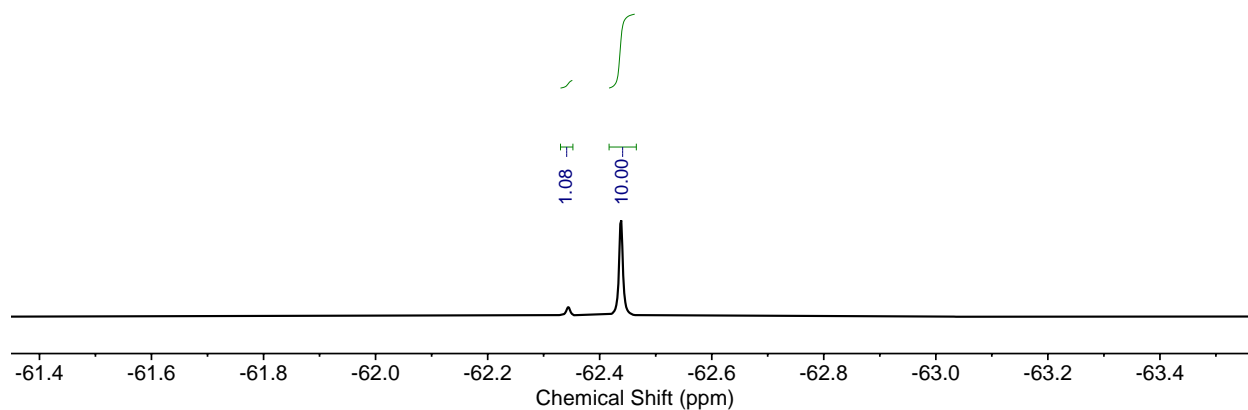

**Figure S41.**  $^{19}\text{F}$  NMR spectra (470 MHz,  $\text{C}_6\text{D}_6$ ) of  $(^{\text{EMindL}}\text{Cu}(\text{O}_2))$  (**2**) under  $\text{N}_2$ , showing equilibration with  $\text{N}_2$  to yield  $(^{\text{EMindL}}\text{Cu}(\text{O}_2))$  (**1**) in *ca.* 10 % yield.

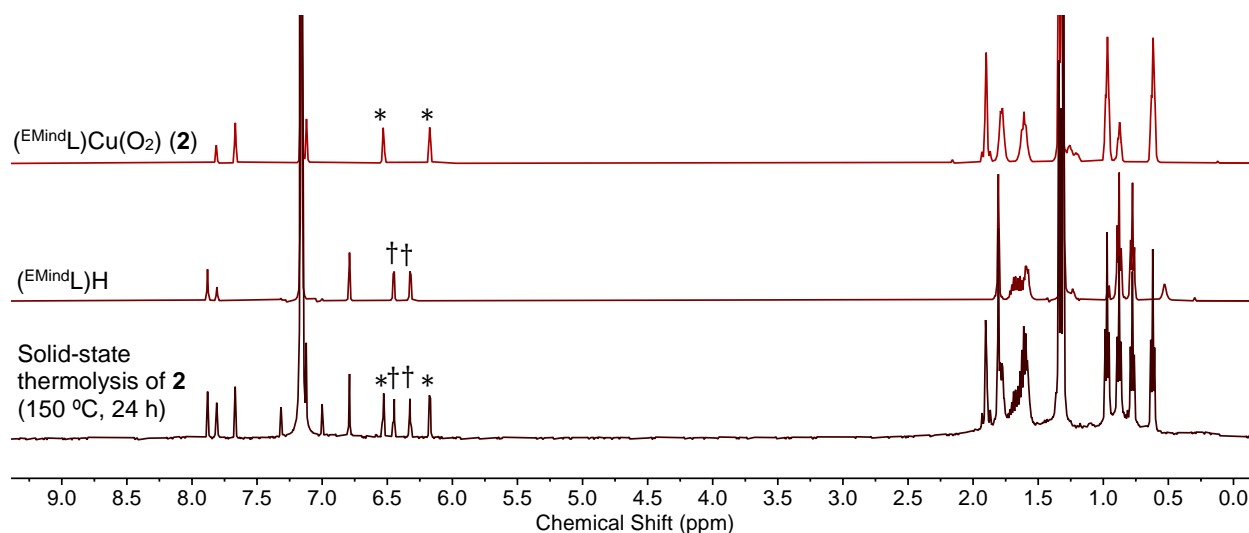

**Figure S42.**  $^1\text{H}$  NMR spectra (500 MHz,  $\text{C}_6\text{D}_6$ ) post solid-state thermolysis of **2** (150 °C, 24 h), illustrating partial formation of  $(^{\text{EMind}}\text{L})\text{H}$  (ca. 47 % yield) with partially unconverted  $(^{\text{EMind}}\text{L})\text{Cu}(\text{O}_2)$  (**2**). Diagnostic resonances of  $(^{\text{EMind}}\text{L})\text{Cu}(\text{O}_2)$  (**2**) are marked with an asterisk (\*), and diagnostic resonances of  $(^{\text{EMind}}\text{L})\text{H}$  are marked with an obelisk (†).

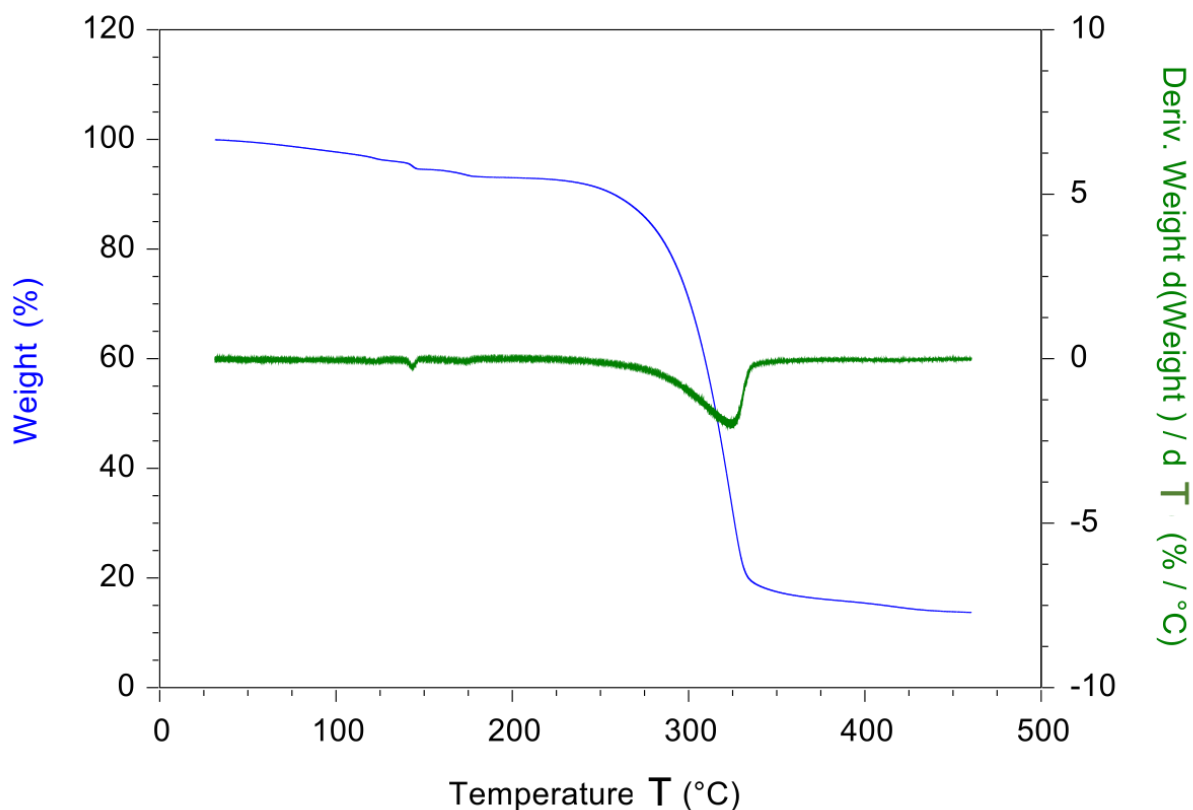

**Figure S43.** Thermogravimetric analysis (TGA) of crystalline  $(^{\text{EMind}}\text{L})\text{Cu}(\text{O}_2)$  (**2**) under Ar with increasing temperature. The initial drop in mass is due to loss of pentane from the unit cell, followed by an event at 140 °C associated with partial decomposition. Ligand decomposition is observed at ca. 280 °C. The heating rate was set at 1 °C/min.

### Single-Crystal-to-Single-Crystal Transformation.

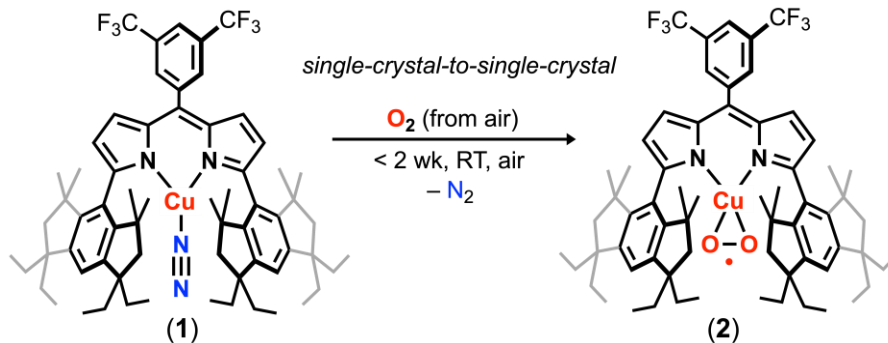

*General Procedure.* A dataset for a crystal of  $(^{EMind}L)Cu(N_2)$  (**1**) was collected. The crystal, kept on the MiTeGen pin with Fluorolube oil, was allowed to stand under air for two weeks, and the data set was recollected and compared to an authentic dataset of  $(^{EMind}L)Cu(O_2)$  (**2**).

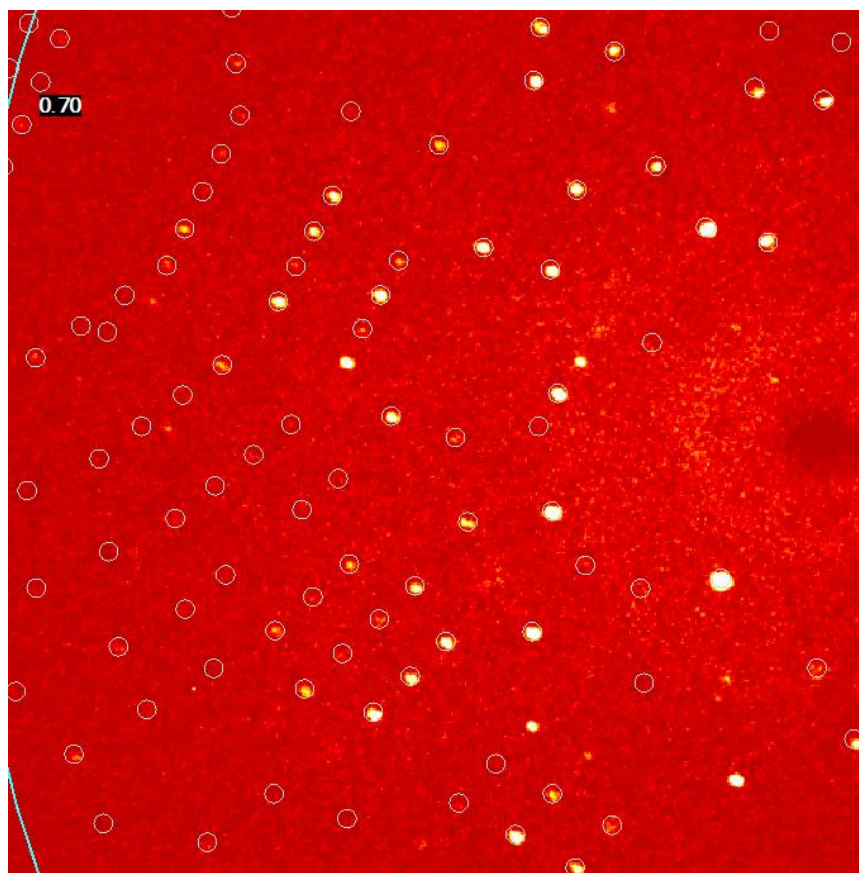

**Figure S44.** Single crystal of  $(^{EMind}L)Cu(N_2)$  (**1**) allowed to stand on MiTeGen pin for two weeks under air, solved as  $(^{EMind}L)Cu(O_2)$  (**2**) with no detectable electron density attributable for the  $N_2$  fragment. The above frame (2 second exposure, 0.70 Å resolution) is displayed as a reference point for the single-crystal-to-single-crystal transformation.

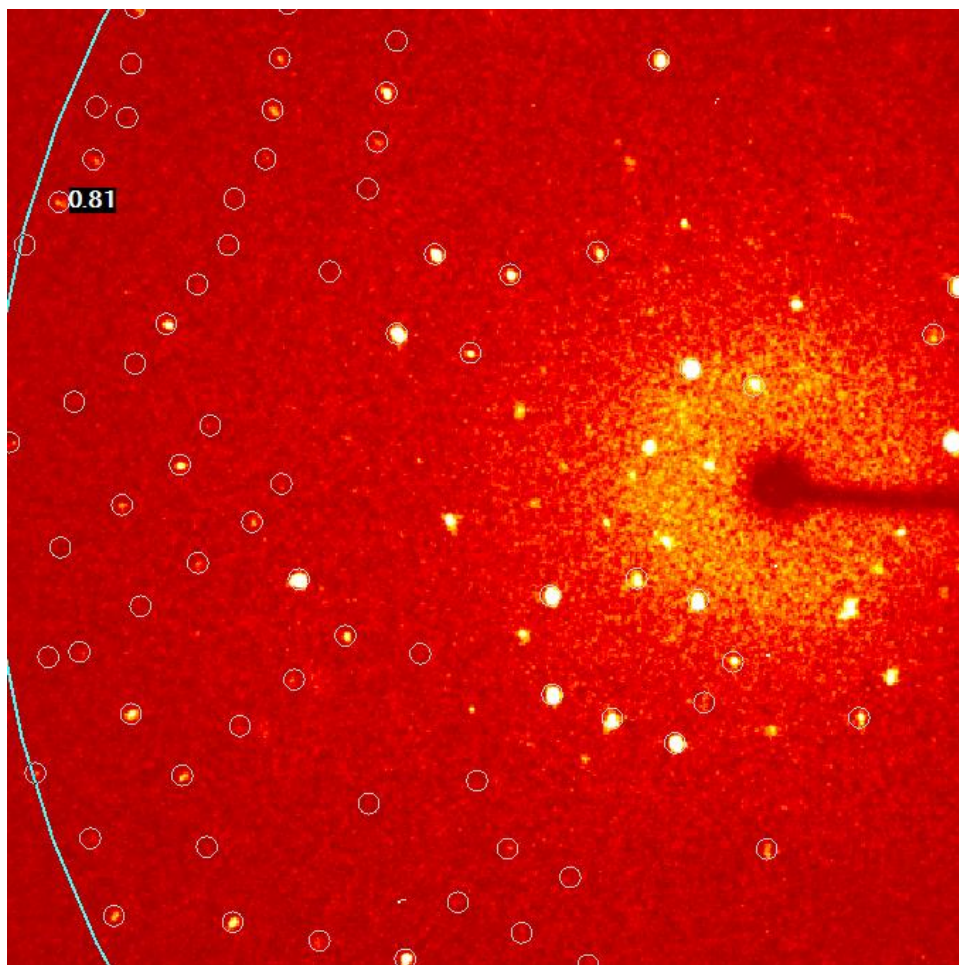

**Figure S45.** Single crystal of (<sup>EMindL</sup>)Cu(N<sub>2</sub>) (**1**) allowed to stand on MiTeGen pin in a vacuum desiccator for 6 days. The above frame (10 second exposure, 0.81 Å resolution) displays crystallinity preserved under prolonged vacuum exposure.



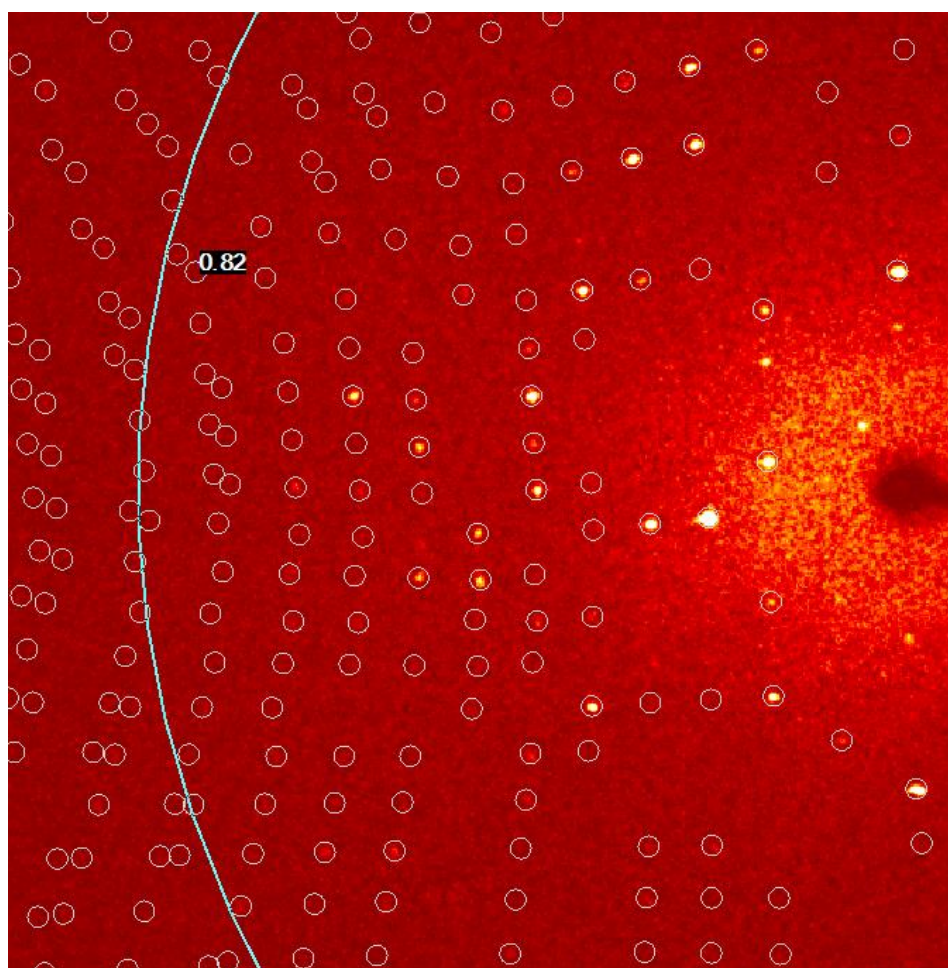

**Figure S46.** Single crystal of  $(^{EMindL})Cu(N_2)$  (**1**) allowed to stand on MiTeGen pin for two weeks under air, solved as  $(^{EMindL})Cu(N_2)$  (**2**) with no detectable electron density attributable for the N<sub>2</sub> fragment. The above frame (1 second exposure, 0.82 Å resolution) depicts minimal degradation and preserved crystallinity.



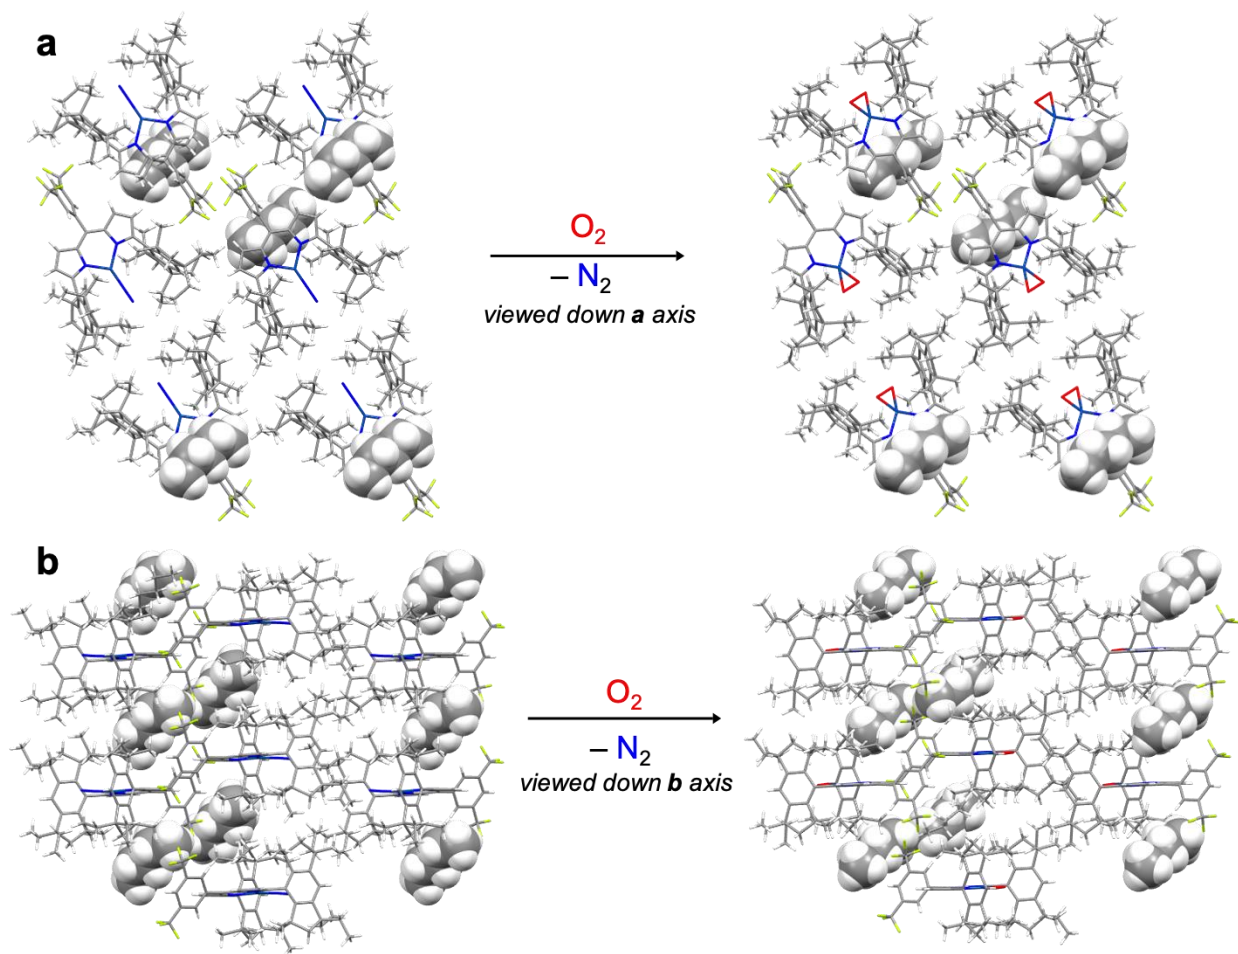

**Figure S47.** Depiction of pentane solvent within crystalline lattice of single-crystal-to-single-crystal conversion of  $(^{\text{EMind}}\text{L})\text{Cu}(\text{N}_2)$  (**1**) to  $(^{\text{EMind}}\text{L})\text{Cu}(\text{N}_2)$  (**2**). The depiction down the **a** axis (*top*) and **b** axis (*bottom*) reveal the pentane solvent molecule is spatially confined between the dipyrin  $\pi$  system and the fluorinated aryl motif, resulting in low volatility under low pressure.

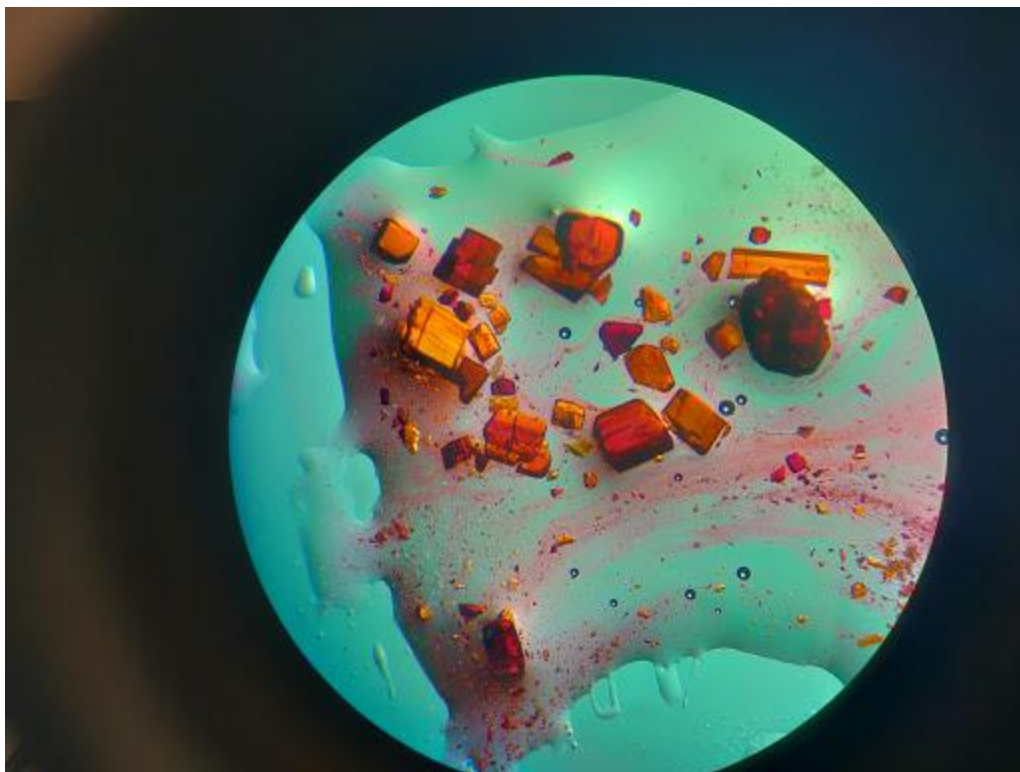

**Figure S48.** Snapshot of single-crystal-to-single crystal transformation (*ca.* 4 days), revealing maintained crystallinity and onset color change attributed to formation of  $(^{\text{EMind}}\text{L})\text{Cu}(\text{O}_2)$  (**2**)

## 1,2-Diphenylhydrazine Oxidation with $(^{E\text{Mind}}\text{L})\text{Cu}(\text{O}_2)$ (**2**) Under Air

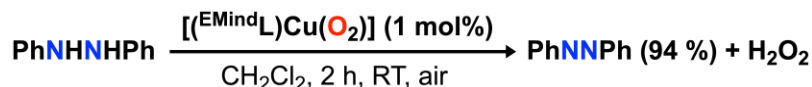

*General Procedure.* In a dinitrogen-filled drybox, crystalline 1,2-diphenylhydrazine was measured into a 20 mL scintillation vial. A stir bar was added, and the vial was exported from the drybox. Meanwhile,  $(^{E\text{Mind}}\text{L})\text{Cu}(\text{O}_2)$  (**2**) was measured out in air and dissolved in the appropriate solvent (*ca.* 2 mL). The scintillation vial containing the arylhydrazine was opened to air, and the stock solution of  $(^{E\text{Mind}}\text{L})\text{Cu}(\text{O}_2)$  was rapidly added with stirring (1000 rpm), resulting in a rapid color change to brown-orange attributed to azoarene formation. The reaction was allowed to continue stirring without a vial cap. Aliquots were removed at the appropriate time point with removal of solvent, and the sample was dissolved in  $\text{C}_6\text{D}_6$  and checked by multinuclear NMR spectroscopy. Control experiments, conducted in the absence of **2** with otherwise identical rapid stirring and reagent quantities, establish the paramount role of **2** in facilitating the reaction (see Fig. S49 and Note I).

*Note I* – The rapidity of 1,2-diphenylhydrazine oxidation was observed to be highly sensitive to speed of stirring and shape of reaction vessel, attributed to rate of solution oxygenation. In accord, reactions set up in NMR tubes were prohibitively slow with constant inversion of the tube (attributed to poor  $\text{O}_2$  diffusion into solution based on minimal exposure of surface area of the solution to air), hindering a detailed kinetic analysis.

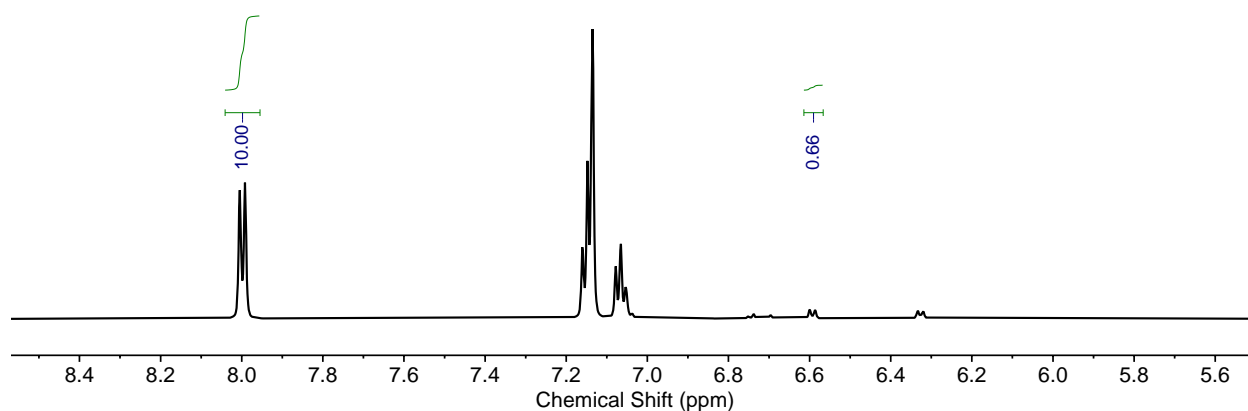

**Figure S49.**  $^1\text{H}$  NMR spectrum (600 MHz,  $\text{C}_6\text{D}_6$ ) of 1,2-diphenylhydrazine oxidation due to formation of  $(^{E\text{Mind}}\text{L})\text{Cu}(\text{O}_2)$  (**2**) in dichloromethane after 2 h. Baseline resonances correspond to dipyrin species.

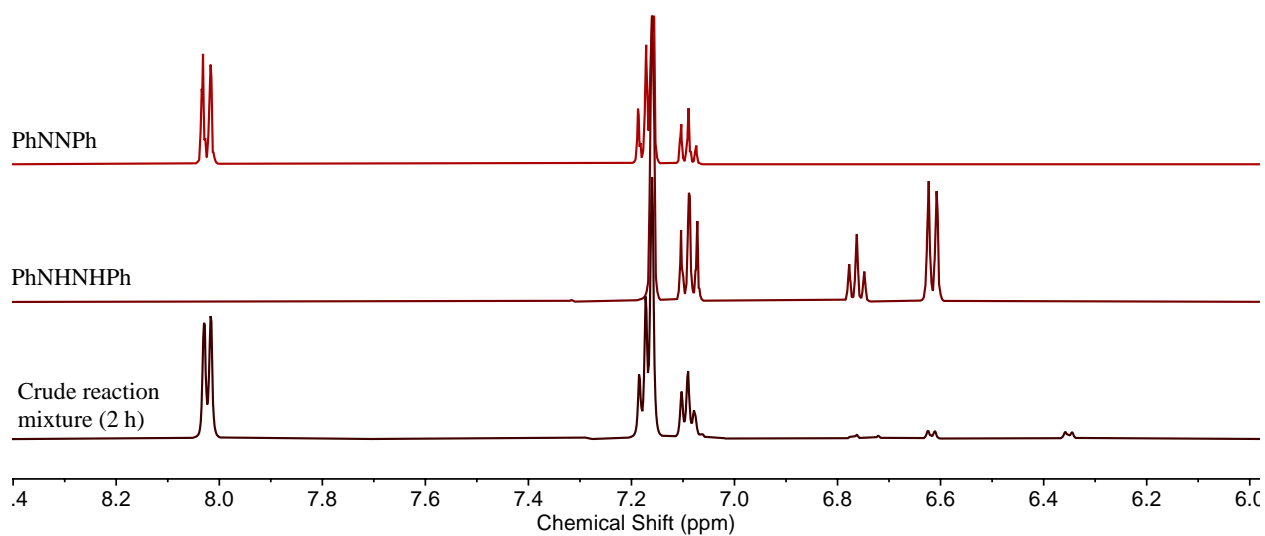

**Figure S50.** <sup>1</sup>H NMR spectrum (600 MHz, C<sub>6</sub>D<sub>6</sub>) of 1,2-diphenylhydrazine oxidation due to formation of (<sup>E</sup>MindL)Cu(O<sub>2</sub>) (**2**) in dichloromethane after 2 h.

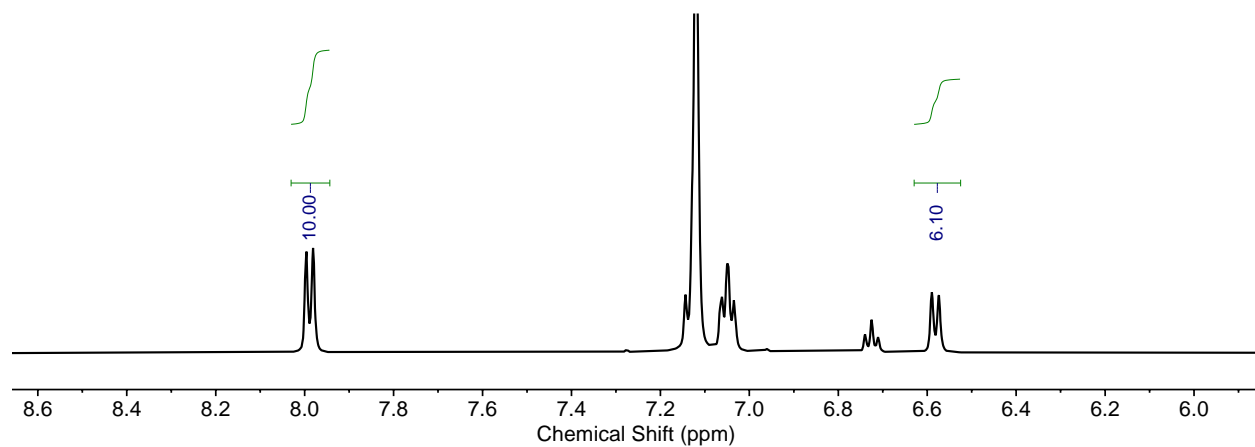

**Figure S51.** <sup>1</sup>H NMR spectrum (500 MHz, C<sub>6</sub>D<sub>6</sub>) of 1,2-diphenylhydrazine oxidation due to formation of (<sup>E</sup>MindL)Cu(O<sub>2</sub>) (**2**) in hexanes after 2 h.

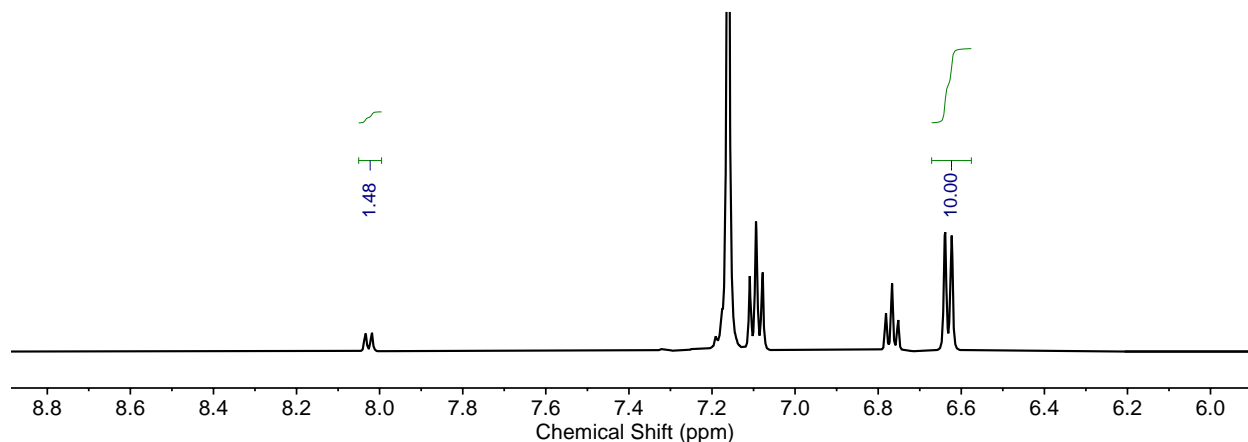

**Figure S52.**  $^1\text{H}$  NMR spectrum (500 MHz,  $\text{C}_6\text{D}_6$ ) of 1,2-diphenylhydrazine auto-oxidation in dichloromethane in the absence of  $(^{\text{EMind}}\text{L})\text{Cu}(\text{O}_2)$  (**2**) after 2 h, revealing minor conversion to azoarene (*ca.* 13 % yield).

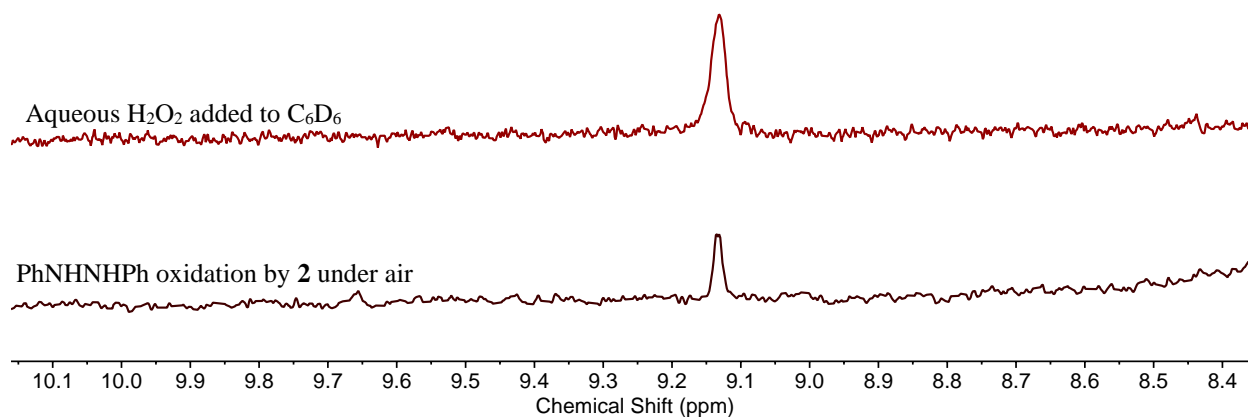

**Figure S53.** Truncated  $^1\text{H}$  NMR spectra overlay (500 MHz,  $\text{C}_6\text{D}_6$ ) of  $\text{H}_2\text{O}_2$  in  $\text{C}_6\text{D}_6$  (*top, red*) juxtaposed to crude 1,2-diphenylhydrazine oxidation (*bottom, maroon*), demonstrating  $\text{H}_2\text{O}_2$  production. Due to the poor solubility of  $\text{H}_2\text{O}_2$  in  $\text{C}_6\text{D}_6$  and loss of  $\text{H}_2\text{O}_2$  during workup step involving evacuation, quantification of  $\text{H}_2\text{O}_2$  by  $^1\text{H}$  NMR spectroscopy was not conducted.

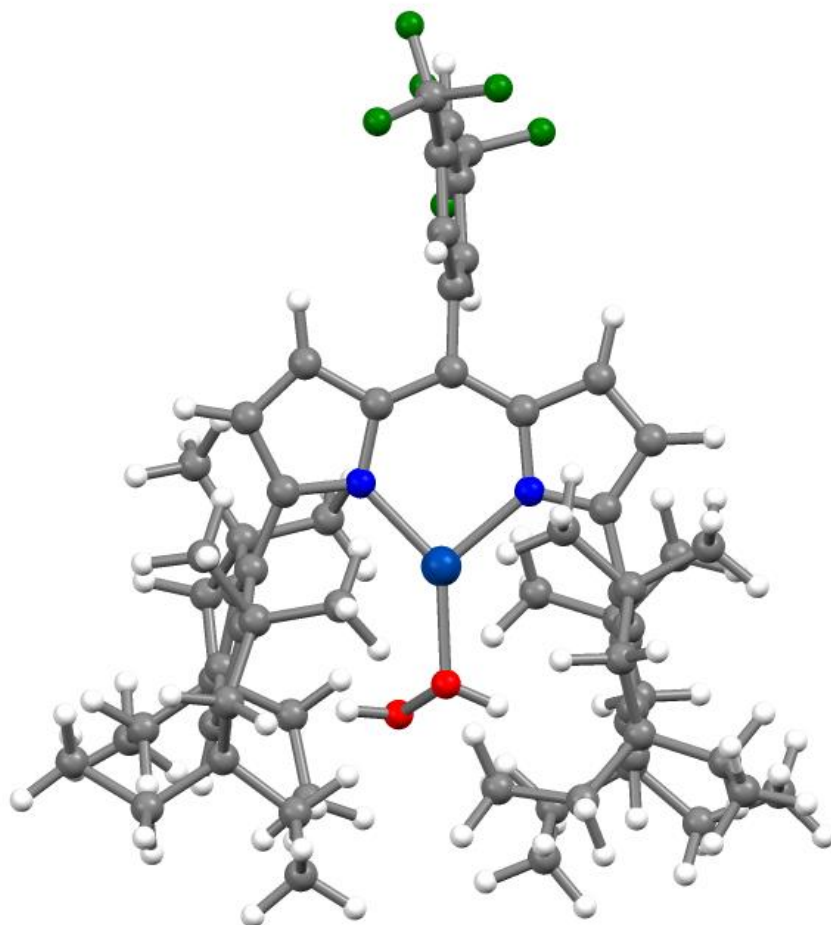

**Figure S54.** Geometry optimized structure of (<sup>E<sub>MindL</sub></sup>Cu(H<sub>2</sub>O<sub>2</sub>)) (**7**) with basis set/functional pairing lacv3p\*\*/B3LYP-d3.<sup>6-10</sup> Computations were conducted with the software *Jaguar*.<sup>11</sup> Successful ground-state optimizations were assessed by the absence of negative frequencies and by the forces on the all atoms residing below 10<sup>-5</sup> hartrees/bohr as well as total energy remaining unchanged by 10<sup>-4</sup> between the final SCF iterations. Color Scheme: Cu (cobalt blue), F (green) N (blue), O (red). Geometry of (<sup>E<sub>MindL</sub></sup>Cu(O<sub>2</sub>)) (**2**) was employed for initial coordinates.

Pertinent bond metrics include the following, which are in agreement with a cuprous ion in the dipyrin framework with an unactivated hydrogen peroxide motif:

Cu–N<sub>dipyrin</sub>: 1.997 Å, 1.998 Å

Cu–O: 2.034 Å

O–O: 1.471 Å (crystalline hydrogen peroxide, d<sub>O–O</sub>: 1.453(7) Å)<sup>12</sup>

Σ(∠Cu): 360 °

Cartesian Coordinates (x,y,z) – Optimization of (<sup>E</sup>MindL)Cu(H<sub>2</sub>O<sub>2</sub>) (7)

|     |          |           |           |
|-----|----------|-----------|-----------|
| Cu1 | 4.410110 | 7.361436  | 16.594389 |
| F2  | 7.405112 | 1.153821  | 10.874097 |
| F3  | 1.426011 | 2.234660  | 10.999123 |
| F4  | 8.011450 | 3.140978  | 10.233004 |
| F5  | 8.216287 | 2.573080  | 12.321695 |
| N6  | 4.776037 | 7.669791  | 14.655753 |
| F7  | 2.125394 | 3.375386  | 9.286696  |
| F8  | 2.779040 | 1.315507  | 9.553522  |
| C9  | 3.793740 | 4.918508  | 18.698532 |
| C10 | 6.267951 | 3.919119  | 18.761608 |
| C11 | 7.418580 | 2.456356  | 11.237449 |
| C12 | 2.829969 | 5.670000  | 19.406300 |
| C13 | 7.850808 | 13.739378 | 16.264208 |
| H14 | 8.468954 | 13.275910 | 15.487411 |
| H15 | 8.205877 | 14.767121 | 16.396055 |
| H16 | 6.826072 | 13.781666 | 15.884068 |
| C17 | 1.403875 | 6.057064  | 18.989836 |
| C18 | 5.139232 | 10.014306 | 14.975759 |
| C19 | 4.527679 | 4.410795  | 12.751843 |
| C20 | 5.967577 | 2.491439  | 18.267862 |
| H21 | 6.910164 | 1.943927  | 18.146947 |
| H22 | 5.452766 | 2.488530  | 17.307230 |
| H23 | 5.351419 | 1.945449  | 18.990971 |
| C24 | 3.443510 | 3.453537  | 15.309607 |
| H25 | 3.295710 | 2.709504  | 14.540023 |
| C26 | 6.782768 | 4.968684  | 21.000224 |
| C27 | 5.118961 | 7.307800  | 12.424210 |
| H28 | 5.187602 | 6.804889  | 11.469266 |
| C29 | 7.173275 | 3.823011  | 20.028088 |
| H30 | 6.977403 | 2.862732  | 20.521065 |
| H31 | 8.236069 | 3.833924  | 19.764154 |
| C32 | 4.355509 | 5.364636  | 13.892347 |
| C33 | 1.649169 | 11.463897 | 15.385341 |
| H34 | 0.946836 | 12.043374 | 14.778394 |
| H35 | 1.041584 | 10.793836 | 16.001761 |
| C36 | 7.692889 | 6.211170  | 20.743917 |
| H37 | 8.737131 | 5.888294  | 20.840839 |
| H38 | 7.566685 | 6.520204  | 19.702264 |
| C39 | 3.876884 | 11.685090 | 16.229773 |

|     |          |           |           |
|-----|----------|-----------|-----------|
| C40 | 3.911075 | 4.793123  | 15.103036 |
| N41 | 3.968531 | 5.428945  | 16.343191 |
| C42 | 8.487527 | 10.630238 | 16.671862 |
| H43 | 9.188069 | 10.069385 | 17.297839 |
| H44 | 9.095897 | 11.290484 | 16.045652 |
| C45 | 3.675489 | 2.951911  | 11.017975 |
| C46 | 4.755666 | 6.693975  | 13.668468 |
| C47 | 7.922921 | 12.970792 | 17.589097 |
| H48 | 7.295503 | 13.482095 | 18.332520 |
| H49 | 8.947883 | 13.017107 | 17.977220 |
| C50 | 3.455719 | 3.914262  | 12.009506 |
| H51 | 2.448177 | 4.259616  | 12.217121 |
| C52 | 4.991507 | 11.971766 | 17.017419 |
| H53 | 4.935225 | 12.721299 | 17.803212 |
| C54 | 6.269741 | 10.315258 | 15.766838 |
| C55 | 5.120034 | 8.825875  | 14.083615 |
| C56 | 2.684073 | 13.806636 | 15.727323 |
| H57 | 3.463729 | 14.316421 | 16.309243 |
| H58 | 3.079049 | 13.724139 | 14.707949 |
| C59 | 3.600899 | 4.538273  | 17.272607 |
| C60 | 8.244290 | 4.120249  | 22.967137 |
| H61 | 8.695951 | 3.352367  | 22.329355 |
| H62 | 8.201280 | 3.721038  | 23.985993 |
| H63 | 8.921544 | 4.980650  | 22.979485 |
| C64 | 2.007493 | 7.008437  | 21.266700 |
| C65 | 5.339592 | 8.650264  | 12.684454 |
| H66 | 5.628778 | 9.420920  | 11.982608 |
| C67 | 6.187462 | 11.293760 | 16.771322 |
| C68 | 2.518960 | 12.368326 | 16.303535 |
| O69 | 4.474103 | 8.713903  | 18.111953 |
| H70 | 4.922963 | 9.555498  | 17.893191 |
| C71 | 6.959205 | 4.704993  | 17.622081 |
| H72 | 7.900689 | 4.214457  | 17.347623 |
| H73 | 7.182756 | 5.734430  | 17.910688 |
| H74 | 6.321259 | 4.751274  | 16.738127 |
| C75 | 4.395743 | 5.996017  | 21.249824 |
| H76 | 4.618701 | 6.421633  | 22.223593 |
| C77 | 3.938423 | 10.715961 | 15.218629 |
| C78 | 5.821463 | 3.940623  | 12.482819 |
| H79 | 6.657484 | 4.309684  | 13.066186 |



|      |          |           |           |
|------|----------|-----------|-----------|
| C80  | 6.844102 | 4.504998  | 22.475525 |
| H81  | 6.437418 | 5.287483  | 23.127869 |
| H82  | 6.169012 | 3.646122  | 22.584044 |
| C83  | 5.348112 | 5.242787  | 20.563657 |
| O84  | 5.350943 | 8.202373  | 19.176951 |
| H85  | 4.732139 | 7.585970  | 19.617055 |
| C86  | 1.420972 | 14.674226 | 15.713105 |
| H87  | 1.620501 | 15.628358 | 15.214037 |
| H88  | 1.068896 | 14.900166 | 16.724293 |
| H89  | 0.599258 | 14.189046 | 15.175138 |
| C90  | 8.292586 | 9.622323  | 14.347407 |
| H91  | 8.276262 | 10.612253 | 13.877676 |
| H92  | 7.764717 | 8.925952  | 13.692293 |
| H93  | 9.337407 | 9.297205  | 14.417304 |
| C94  | 3.138913 | 6.189076  | 20.670646 |
| C95  | 3.226318 | 3.303486  | 16.666638 |
| H96  | 2.883392 | 2.420780  | 17.187537 |
| C97  | 4.954650 | 2.467004  | 10.767814 |
| H98  | 5.114060 | 1.698310  | 10.020927 |
| C99  | 2.592687 | 10.602467 | 14.486690 |
| C100 | 5.047737 | 4.684016  | 19.308145 |
| C101 | 7.337366 | 10.913258 | 18.964916 |
| H102 | 7.094834 | 9.847783  | 18.899727 |
| H103 | 6.464683 | 11.395329 | 19.427911 |
| C104 | 7.498526 | 11.479452 | 17.523626 |
| C105 | 6.027049 | 2.966353  | 11.509374 |
| C106 | 1.392862 | 7.076292  | 17.827208 |
| H107 | 2.017734 | 7.946055  | 18.052243 |
| H108 | 0.370569 | 7.430084  | 17.647175 |
| H109 | 1.762899 | 6.626276  | 16.903204 |
| C110 | 7.633135 | 8.240783  | 16.342767 |
| H111 | 8.654060 | 7.851161  | 16.435449 |
| H112 | 7.065294 | 7.561159  | 15.703588 |
| H113 | 7.175749 | 8.219785  | 17.336789 |
| C114 | 1.955265 | 12.443708 | 17.745871 |
| H115 | 2.512935 | 13.209163 | 18.303444 |
| H116 | 0.922044 | 12.807923 | 17.688850 |
| C117 | 7.462249 | 7.434116  | 21.636014 |
| H118 | 6.453220 | 7.838179  | 21.515308 |
| H119 | 8.160683 | 8.232325  | 21.363069 |

|      |           |           |           |
|------|-----------|-----------|-----------|
| H120 | 7.616022  | 7.210237  | 22.696951 |
| C121 | 0.563199  | 4.829714  | 18.591038 |
| H122 | 0.939792  | 4.368840  | 17.674536 |
| H123 | -0.478245 | 5.126497  | 18.419661 |
| H124 | 0.575084  | 4.073233  | 19.383626 |
| C125 | 1.978396  | 11.133705 | 18.541353 |
| H126 | 2.998280  | 10.781641 | 18.716265 |
| H127 | 1.444559  | 10.326988 | 18.028073 |
| H128 | 1.499989  | 11.270123 | 19.515754 |
| C129 | 2.502021  | 2.461858  | 10.211301 |
| C130 | 7.663989  | 9.670699  | 15.751742 |
| C131 | 2.713823  | 11.200417 | 13.066457 |
| H132 | 1.737586  | 11.191576 | 12.566821 |
| H133 | 3.410078  | 10.614117 | 12.459574 |
| H134 | 3.072408  | 12.234152 | 13.092585 |
| C135 | 0.829755  | 6.707516  | 20.293469 |
| H136 | 0.256694  | 7.610103  | 20.061639 |
| H137 | 0.128734  | 6.012700  | 20.765484 |
| C138 | 8.548012  | 11.082858 | 19.889926 |
| H139 | 9.454778  | 10.647600 | 19.454850 |
| H140 | 8.367189  | 10.578397 | 20.844891 |
| H141 | 8.756233  | 12.134907 | 20.108095 |
| C142 | 2.025828  | 9.171686  | 14.380325 |
| H143 | 2.087525  | 8.649262  | 15.340444 |
| H144 | 2.554352  | 8.569754  | 13.640093 |
| H145 | 0.971176  | 9.223308  | 14.082993 |
| C146 | 2.431248  | 8.507458  | 21.226447 |
| H147 | 3.395197  | 8.604195  | 21.745163 |
| H148 | 2.621381  | 8.784253  | 20.182478 |
| C149 | 1.683624  | 6.581951  | 22.722470 |
| H150 | 0.751735  | 7.074815  | 23.025898 |
| H151 | 2.464257  | 6.976845  | 23.387469 |
| C152 | 1.554488  | 5.070254  | 22.949394 |
| H153 | 0.797250  | 4.622172  | 22.296374 |
| H154 | 1.262692  | 4.859783  | 23.983827 |
| H155 | 2.499890  | 4.555081  | 22.753973 |
| C156 | 1.437688  | 9.498823  | 21.839561 |
| H157 | 0.457645  | 9.445904  | 21.352511 |
| H158 | 1.805433  | 10.523745 | 21.726915 |
| H159 | 1.289592  | 9.319771  | 22.908868 |

**Table S2.** X-ray diffraction experimental details.<sup>a</sup>

|                                                                               | <sup>(EMindL)</sup> Cu( $\eta^2$ -C <sub>6</sub> H <sub>6</sub> )<br>( <b>1-benzene</b> ) – 2049910 | <sup>(EMindL)</sup> Cu(O <sub>2</sub> )<br>( <b>2</b> ) – 2049906                                              | <sup>(EMindL)</sup> Cu(CH <sub>2</sub> Cl <sub>2</sub> )<br>( <b>4</b> ) – 2049909                             | <sup>(EMindL)</sup> Cu(NH <sub>2</sub> NH <sub>2</sub> )<br>( <b>5</b> ) – 2049908              | <sup>(EMindL)</sup> CuI<br>( <b>6</b> ) – 2049907                |
|-------------------------------------------------------------------------------|-----------------------------------------------------------------------------------------------------|----------------------------------------------------------------------------------------------------------------|----------------------------------------------------------------------------------------------------------------|-------------------------------------------------------------------------------------------------|------------------------------------------------------------------|
| <b>Moiety Formula</b>                                                         | C <sub>71</sub> H <sub>87</sub> CuF <sub>6</sub> N <sub>2</sub> •C <sub>6</sub> H <sub>6</sub>      | C <sub>65</sub> H <sub>81</sub> CuF <sub>6</sub> N <sub>2</sub> O <sub>2</sub> •C <sub>5</sub> H <sub>12</sub> | C <sub>66</sub> H <sub>81</sub> Cl <sub>2</sub> Cu <sub>2</sub> N <sub>2</sub> •C <sub>5</sub> H <sub>12</sub> | C <sub>65</sub> H <sub>85</sub> CuF <sub>6</sub> N <sub>4</sub> •C <sub>5</sub> H <sub>12</sub> | C <sub>65</sub> H <sub>81</sub> CuF <sub>6</sub> IN <sub>2</sub> |
| <b>FW</b>                                                                     | 1296.29                                                                                             | 1172.02                                                                                                        | 1222.93                                                                                                        | 1172.07                                                                                         | 1194.77                                                          |
| <b><math>\lambda</math> (nm)</b>                                              | 0.71073                                                                                             | 0.71073                                                                                                        | 0.71073                                                                                                        | 0.71073                                                                                         | 0.71073                                                          |
| <b><i>T</i> (K)</b>                                                           | 100(2)                                                                                              | 100(2)                                                                                                         | 100(2)                                                                                                         | 100(2)                                                                                          | 100(2)                                                           |
| <b>Crystal System</b>                                                         | Triclinic                                                                                           | Triclinic                                                                                                      | Triclinic                                                                                                      | Triclinic                                                                                       | Triclinic                                                        |
| <b>Space Group (<i>Z</i>)</b>                                                 | P $\bar{1}$ (2)                                                                                     | P $\bar{1}$ (2)                                                                                                | P $\bar{1}$ (2)                                                                                                | P $\bar{1}$ (2)                                                                                 | P $\bar{1}$ (2)                                                  |
| <b><i>a</i> (Å)</b>                                                           | 14.0750(8)                                                                                          | 10.415(2)                                                                                                      | 10.757(12)                                                                                                     | 10.514(4)                                                                                       | 10.546(4)                                                        |
| <b><i>b</i> (Å)</b>                                                           | 14.2433(8)                                                                                          | 13.866(3)                                                                                                      | 14.73(2)                                                                                                       | 13.806(3)                                                                                       | 13.838(6)                                                        |
| <b><i>c</i> (Å)</b>                                                           | 17.2305(10)                                                                                         | 22.041(5)                                                                                                      | 22.63(2)                                                                                                       | 22.372(5)                                                                                       | 22.418(8)                                                        |
| <b><math>\alpha</math> (°)</b>                                                | 93.596(1)                                                                                           | 94.705(4)                                                                                                      | 93.90(4)                                                                                                       | 82.714(14)                                                                                      | 97.302(8)                                                        |
| <b><math>\beta</math> (°)</b>                                                 | 103.655(1)                                                                                          | 93.341(5)                                                                                                      | 99.65(3)                                                                                                       | 89.690(15)                                                                                      | 90.014(8)                                                        |
| <b><math>\gamma</math> (°)</b>                                                | 99.936(1)                                                                                           | 97.663(4)                                                                                                      | 96.60(5)                                                                                                       | 82.004(11)                                                                                      | 97.506(8)                                                        |
| <b>Volume (Å<sup>3</sup>)</b>                                                 | 3286.9(3)                                                                                           | 3136.3(12)                                                                                                     | 3498(7)                                                                                                        | 3189.7(16)                                                                                      | 3217(2)                                                          |
| <b>Calc. <math>\rho</math> (mg/m<sup>3</sup>)</b>                             | 1.237                                                                                               | 1.241                                                                                                          | 1.161                                                                                                          | 1.220                                                                                           | 1.233                                                            |
| <b><math>\mu</math> (mm<sup>-1</sup>)</b>                                     | 0.394                                                                                               | 0.412                                                                                                          | 0.444                                                                                                          | 0.403                                                                                           | 0.874                                                            |
| <b>Crystal Size (mm)</b>                                                      | 0.16x0.22x0.23                                                                                      | 0.13x0.22x0.24                                                                                                 | 0.17x0.22x0.23                                                                                                 | 0.10x0.10x0.20                                                                                  | 0.12x0.15x0.40                                                   |
| <b>Reflections</b>                                                            | 8322                                                                                                | 7017                                                                                                           | 6913                                                                                                           | 7366                                                                                            | 6338                                                             |
| <b>Completeness (to <math>2\theta</math>)</b>                                 | 0.990                                                                                               | 0.960                                                                                                          | 0.960                                                                                                          | 0.984                                                                                           | 0.992                                                            |
| <b>GOF on F<sup>2</sup></b>                                                   | 1.068                                                                                               | 1.027                                                                                                          | 1.039                                                                                                          | 1.029                                                                                           | 0.973                                                            |
| <b>R1, wR2<sup>a</sup><br/>[<i>I</i> &gt; 2<math>\sigma</math>(<i>I</i>)]</b> | 0.0469, 0.1311                                                                                      | 0.0641, 0.1685                                                                                                 | 0.0879, 0.2803                                                                                                 | 0.0663, 0.1391                                                                                  | 0.0778, 0.1975                                                   |

$$^a R1 = \sum ||F_o| - |F_c|| / \sum |F_o|, wR2 = \{\sum [w(F_o^2 - F_c^2)^2] / \sum [w(F_o^2)^2]\}^{1/2}$$

**X-Ray Diffraction Techniques.** All structures were collected on a Bruker three-circle platform goniometer equipped with an Apex II CCD and an Oxford cryostream-cooling device fixed at 100 K. Radiation was from a graphite fine focus sealed tube Mo K $\alpha$  ( $\lambda = 0.71073 \text{ \AA}$ ) source (**1-benzene**, **2**, **3**, **4**, **5**, **6**). The partial solubility of all complexes on the (<sup>E</sup>MindL) platform in Paratone-*N* oil forced us to employ an alternative crystal mounting procedure. Crystals were suspended in minimal thawing Fluorolube (stored in a vacuum desiccator or the drybox to minimize water content), quickly transferred to a dry ice bath outside the drybox (< 10 seconds transit time) and rapidly transferred to a room temperature microscope slide (*ca.* 3 minute transit time) for crystal selection with a glass fiber pin. At room temperature, crystals were observed to darken rapidly and lose the ability to polarize incidental light, attributed to desolvation of the unit cell and gradual dissolution into the surrounding oil. Such behavior was common for crystals isolated from slow cooling of concentrated hydrocarbon solutions, pentane in particular. Consequently, the crystal selection process was rapidly conducted at low temperatures, considering crystal size and crystal quality. For **1-benzene** and **4**, rapid degradation of the crystals was observed under ambient conditions due to the heightened sensitivity to O<sub>2</sub> and N<sub>2</sub>. None of the crystals shows significant decay during the data collection.

Data was collected as a series of  $\varphi$  and/or  $\omega$  scans. Data integration down to 0.84  $\text{\AA}$  resolution was carried out using SAINT V8.37 A<sup>13</sup> with reflection spot size optimization. Absorption corrections were made with the program SADABS.<sup>14</sup> Space group assignments were determined by examination of systematic absences, E-statistics, and successive refinement of the structures. The structure was solved by the Intrinsic Phasing methods and refined by least-squares methods against  $F^2$  using SHELXT-2014<sup>15</sup> and SHELXL-2014<sup>16</sup> with the OLEX2 interface.<sup>17</sup> The program PLATON was employed to confirm the absence of higher symmetry space groups.<sup>18</sup> All non-H atoms, including the disorder fragments, were located in difference Fourier maps, and then refined anisotropically. The restraints on bond lengths and constraints of the atomic displacement parameters on each pair of disorder fragments (SADI/SAME and EADP instructions of SHELXL-2014)<sup>16</sup> as well as the restraints of the atomic displacement parameters (SIMU/RIGU instructions of SHELXL-2014), if necessary, have been applied for the disorder refinement.<sup>19</sup> All non-hydrogen atoms were refined anisotropically. Outlier reflections were omitted from refinement when appropriate. Hydrogen atoms on C atoms were placed at idealized positions and refined using a riding model. The isotropic displacement parameters of all hydrogen atoms were fixed to 1.2 times the atoms they are linked to (1.5 times for methyl groups). Crystallographic refinement details, including disorder modeling and software employed, have been delineated within in each crystallographic information file (\*.cif).

Molecular graphics were generated using Povray V3.7.<sup>20</sup>

Further details on particular structures are noted below:

**(<sup>EMind</sup>L)Cu( $\eta^2$ -C<sub>6</sub>H<sub>6</sub>) (1-benzene).** The structure was solved in the triclinic space group  $P\bar{1}$  with one molecule of copper-containing complex per asymmetric unit and two molecules per unit cell. One molecule of pentane was located and modelled appropriately. Positional disorder of the benzene ligand (C66–C71) over two positions was observed, which was modelled using similarity constraints and restraints. CCDC Identifier: 2049910.

**(<sup>EMind</sup>L)Cu(O<sub>2</sub>) (2).** The structure was solved in the triclinic space group  $P\bar{1}$  with one molecule of copper-containing complex per asymmetric unit and two molecules per unit cell. One molecule of pentane was positionally disordered and modelled using similarity constraints and restraints. One of the trifluoromethyl substituents containing C17 was positionally and rotationally disordered and subsequently modelled using similarity constraints and restraints. Several reflects were coincidental with the beam-stop and omitted. CCDC Identifier: 2049906.

**(<sup>EMind</sup>L)Cu(CH<sub>2</sub>Cl<sub>2</sub>) (4).** The structure was solved in the triclinic space group  $P\bar{1}$  with one molecule of copper-containing complex per asymmetric unit and two molecules per unit cell. One molecule of pentane was located and modelled appropriately using the RIGU command. A second molecule of pentane was disordered about a special position and squeezed out using the Olex2 mask function to improve the C–C bond precision. The ligated molecule of dichloromethane was disordered over two positions and modelled using similarity constraints and restraints. CCDC Identifier: 2049909

**(<sup>EMind</sup>L)Cu(NH<sub>2</sub>NH<sub>2</sub>) (5).** The structure was solved in the triclinic space group  $P\bar{1}$  with one molecule of copper-containing complex per asymmetric unit and two molecules per unit cell. Positional disorder of an ethyl motif containing C55 was modeled using similarity constraints and restraints. The trifluoromethyl motif containing C16 was positionally and rotationally disordered, modelled using similarity constraints and restraints. The hydrazine motif containing N3 was disordered over two positions and modelled appropriately. One molecule of pentane was located and modelled appropriately. CCDC Identifier: 2049908.

**(<sup>EMind</sup>L)CuI (6).** The structure was solved in the triclinic space group  $P\bar{1}$  with one molecule of copper-containing complex per asymmetric unit and two molecules per unit cell. Positional disorder within the hydrindacene motif containing C58 was modeled using similarity constraints and restraints. One molecule of pentane was located and disordered about a special position (inversion center), which could not be satisfactorily modelled without diffuse ellipsoids. The solvent molecule was squeezed out using the Olex2 mask function to improve the C–C bond precision. CCDC Identifier: 2049907.

**Table S3.** Pertinent bond metrics of (<sup>EMindL</sup>)Cu( $\eta^2$ -C<sub>6</sub>H<sub>6</sub>) (**1-benzene**).

|         |            |                          |            |
|---------|------------|--------------------------|------------|
| Cu1–N1  | 1.997(2) Å | $\Sigma$ ( $\angle$ Cu1) | 360.5(8) ° |
| Cu1–N2  | 1.984(2) Å | $\angle$ N1–Cu1–N2       | 99.72(8) ° |
| Cu1–C66 | 2.19(1) Å  | Cu1–C67                  | 2.24(2) °  |

**Table S4.** Pertinent bond metrics of (<sup>EMindL</sup>)Cu(O<sub>2</sub>) (**2**).

|        |            |                          |            |
|--------|------------|--------------------------|------------|
| Cu1–N1 | 1.887(3) Å | $\Sigma$ ( $\angle$ Cu1) | 360.0(2) ° |
| Cu1–N2 | 1.885(3) Å | O1–O2                    | 1.378(4) ° |
| Cu1–O1 | 1.823(3) Å | Cu1–O2                   | 1.834(3) ° |

**Table S5.** Pertinent bond metrics of (<sup>EMindL</sup>)Cu(CH<sub>2</sub>Cl<sub>2</sub>) (**4**).

|         |            |                          |            |
|---------|------------|--------------------------|------------|
| Cu1–N1  | 1.943(5) Å | $\Sigma$ ( $\angle$ Cu1) | 359.7(5) ° |
| Cu1–N2  | 1.949(5) Å | $\angle$ N1–Cu1–Cl1      | 118.4(3) ° |
| Cu1–Cl1 | 2.177(9) Å | $\angle$ N2–Cu1–Cl1      | 141.7(3) ° |

**Table S6.** Pertinent bond metrics of (<sup>EMindL</sup>)Cu(NH<sub>2</sub>NH<sub>2</sub>) (**5**).

|        |            |                          |            |
|--------|------------|--------------------------|------------|
| Cu1–N1 | 1.955(3) Å | $\Sigma$ ( $\angle$ Cu1) | 359.8(4) ° |
| Cu1–N2 | 1.975(3) Å | $\angle$ N1–Cu1–N3       | 116.7(3) ° |
| Cu1–N3 | 1.93(1) Å  | $\angle$ N2–Cu1–N3       | 148.0(3) ° |
| N3–N4  | 1.47(2) Å  | $\angle$ Cu1–N3–N4       | 117.2(8) ° |

**Table S7.** Pertinent bond metrics of (<sup>EMindL</sup>)CuI (**6**).

|        |            |                          |            |
|--------|------------|--------------------------|------------|
| Cu1–N1 | 1.913(6) Å | $\Sigma$ ( $\angle$ Cu1) | 360.1(3) ° |
| Cu1–N2 | 1.909(4) Å | $\angle$ N1–Cu1–I1       | 133.5(2) ° |
| Cu1–I1 | 2.399(1) Å | $\angle$ N2–Cu1–I1       | 130.7(1) ° |

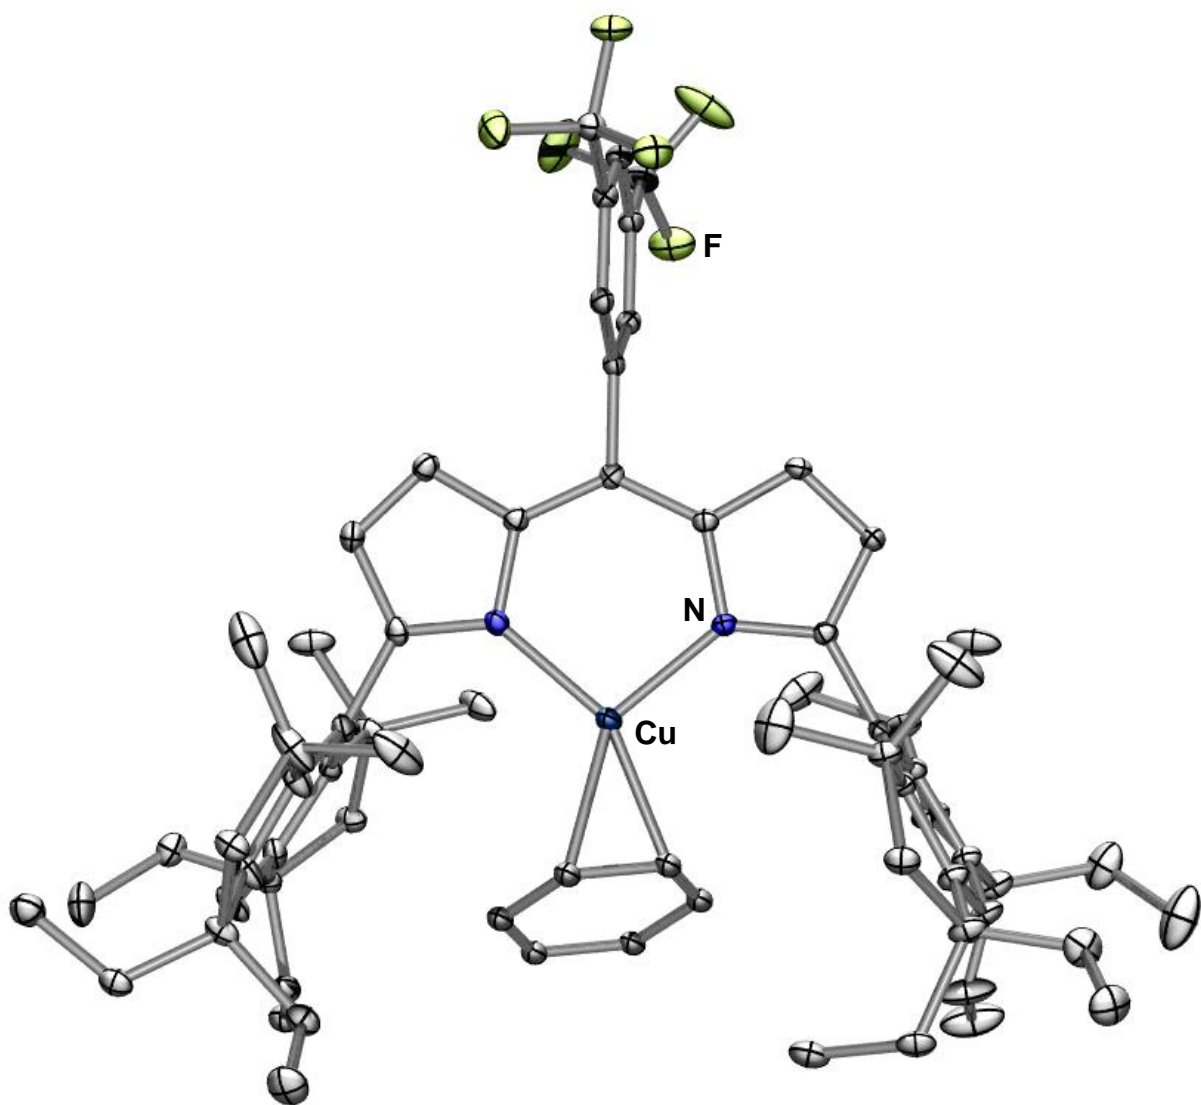

**Figure S55.** Solid-state molecular structure of  $(^{EMind}L)Cu(\eta^2-C_6H_6)$  with displacement ellipsoids at 50 % probability level. Hydrogen atoms, structural disorder, and solvent molecules are omitted for clarity. Color scheme: Cu (*cobalt blue*), F (*yellow-green*), N (*blue*).

Single crystals suitable for X-ray diffraction were obtained through reverse vapor diffusion of hexamethyldisiloxane into a saturated pentane solution of **1** with excess benzene (*ca.* 20 equiv.) under Ar. In the presence of  $N_2$  and absence of excess benzene, reversion to  $(^{EMind}L)Cu(N_2)$  is observed in both solution and solid state.

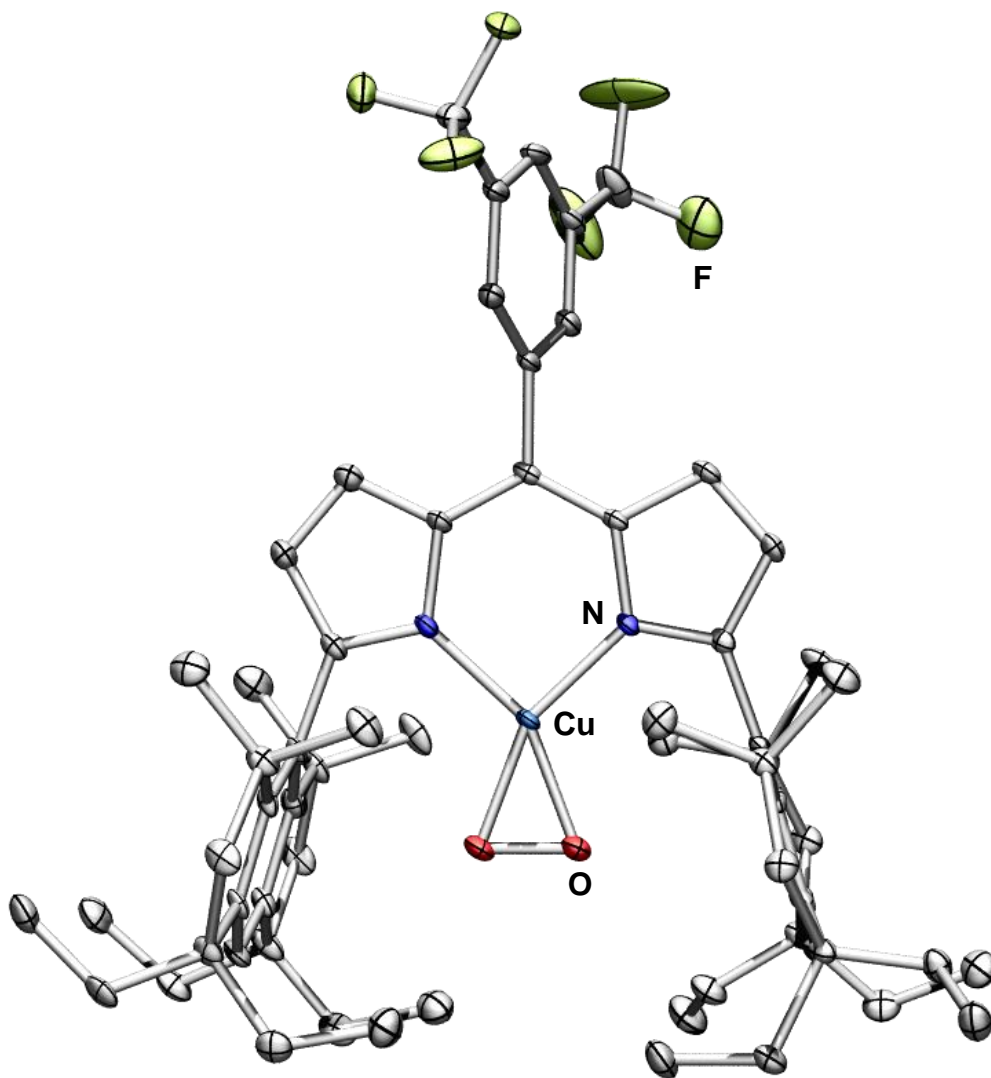

**Figure S56.** Solid-state molecular structure of  $(^{EMind}L)Cu(O_2)$  (**2**) with displacement ellipsoids at 50 % probability level. Hydrogen atoms, structural disorder, and solvent molecules are omitted for clarity. Color scheme: Cu (*cobalt blue*), F (*yellow-green*), N (*blue*), O (*red*).



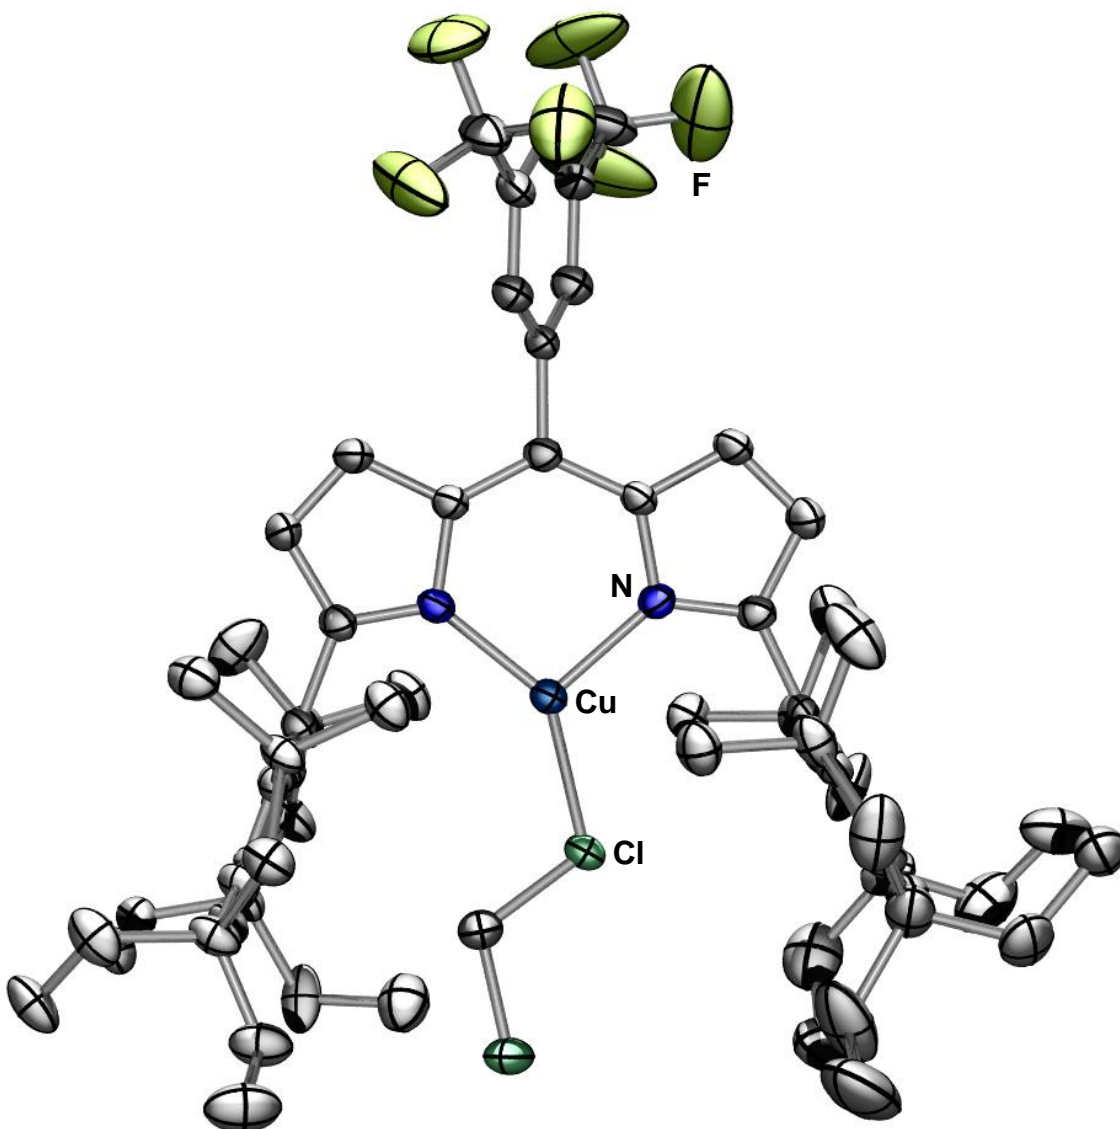

**Figure S57.** Solid-state molecular structure of  $(^{EMind}L)Cu(CH_2Cl_2)$  (**4**) with displacement ellipsoids at 50 % probability level. Hydrogen atoms, structural disorder, and solvent molecules are omitted for clarity. Color scheme: Cu (*cobalt blue*), Cl (*green*), F (*yellow-green*), N (*blue*).

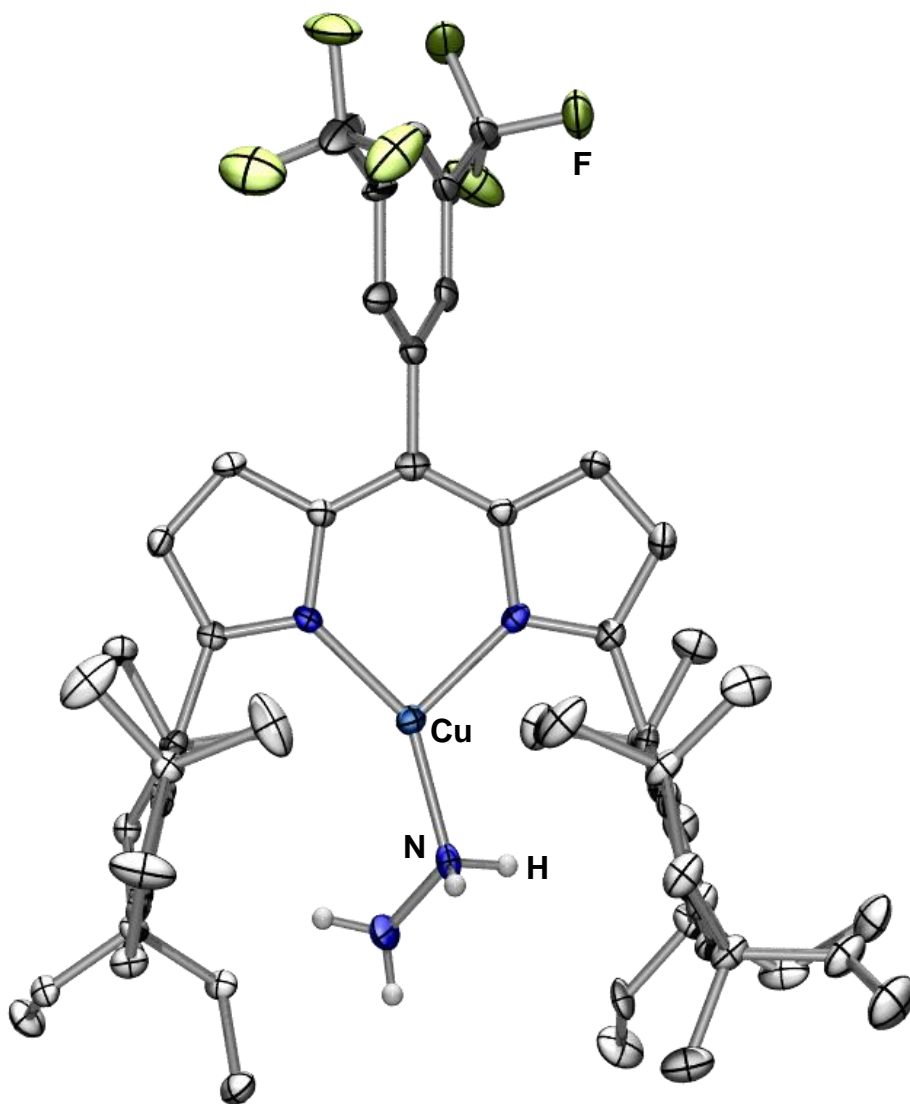

**Figure S58.** Solid-state molecular structure of  $(^{E\text{Mind}}L)\text{Cu}(\text{NH}_2\text{NH}_2)$  (**5**) with displacement ellipsoids at 50 % probability level. Hydrogen atoms excluding those comprising the hydrazine fragment, structural disorder, and solvent molecules are omitted for clarity. Color scheme: Cu (cobalt blue), F (yellow-green), N (blue).

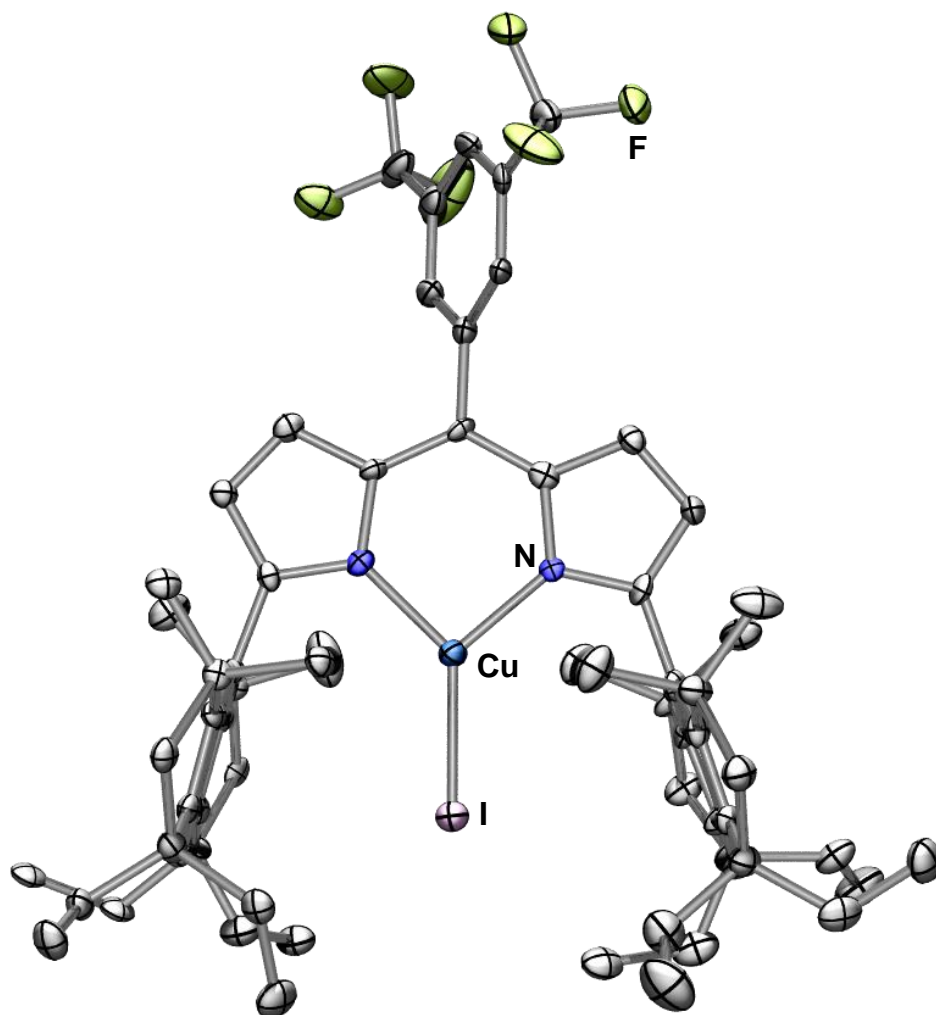

**Figure S59.** Solid-state molecular structure of  $(^{EMindL})CuI$  (**6**) with displacement ellipsoids at 50 % probability level. Hydrogen atoms, structural disorder, and solvent molecules are omitted for clarity. Color scheme: Cu (*cobalt blue*), F (*yellow-green*), I (*pink*), N (*blue*).

## References.

- (1) Weitz, I. S.; Rabinovitz, M., The Application of C<sub>8</sub>K for Organic Synthesis: Reduction of Substituted Naphthalenes. *J. Chem. Soc. Perkin 1* **1993**, 117.
- (2) Kadassery, K. J.; Dey, S. K.; Cannella, A. F.; Surendhran, R.; Lacy, D. C., Photochemical Water-Splitting with Organomanganese Complexes. *Inorg. Chem.* **2017**, *56*, 9954.
- (3) Konnick, M. M.; Guzei, I. A.; Stahl, S. S., Characterization of Peroxo and Hydroperoxo Intermediates in the Aerobic Oxidation of N-Heterocyclic-Carbene-Coordinated Palladium(0). *J. Am. Chem. Soc.* **2004**, *126*, 10212.
- (4) Carsch, K. M.; DiMucci, I. M.; Iovan, D. A.; Li, A.; Zheng, S.-L.; Titus, C. J.; Lee, S. J.; Irwin, K. D.; Nordlund, D.; Lancaster, K. M.; Betley, T. A., Syntheses of a Copper-Supported Triplet Nitrene Complex Pertinent to Copper-Catalyzed Amination. *Science* **2019**, *365*, 1138.
- (5) Stoll, S.; Schweiger, A., EasySpin, a Comprehensive Software Package for Spectral Simulation and Analysis in EPR. *J. Magn. Reson.* **2006**, *178*, 42.
- (6) Francl, M. M.; Pietro, W. J.; Hehre, W. J.; Binkley, J. S.; Gordon, M. S.; DeFrees, D. J.; Pople, J. A., Self-Consistent Molecular Orbital Methods. XXIII. A Polarization-Type Basis Set for Second-Row Elements. *J. Chem. Phys.* **1982**, *77*, 3654.
- (7) Hehre, W. J.; Ditchfield, R.; Pople, J. A., Self-Consistent Molecular Orbital Methods. XII. Further Extensions of Gaussian-Type Basis Sets for Use in Molecular Orbital Studies of Organic Molecules. *J. Chem. Phys.* **1972**, *56*, 2257.
- (8) Grimme, S., Semiempirical Hybrid Density Functional with Perturbative Second-Order Correlation. *J. Chem. Phys.* **2006**, *124*, 034108.
- (9) Becke, A. D., Density-Functional Thermochemistry. I. The Effect of the Exchange-Only Gradient Correction. *J. Chem. Phys.* **1992**, *96*, 2155.
- (10) Barone, V.; Cossi, M., Quantum Calculation of Molecular Energies and Energy Gradients in Solution by a Conductor Solvent Model. *J. Phys. Chem. A* **1998**, *102*, 1995.
- (11) Bochevarov, A. D.; Harder, E.; Hughes, T. F.; Greenwood, J. R.; Braden, D. A.; Philipp, D. M.; Rinaldo, D.; Halls, M. D.; Zhang, J.; Friesner, R. A., Jaguar: A High-Performance Quantum Chemistry Software Program with Strengths in Life and Materials Sciences. *Int. J. Quantum Chem.* **2013**, *113*, 2110.
- (12) Busing, W. R.; Levy, H. A., Crystal and Molecular Structure of Hydrogen Peroxide: A Neutron-Diffraction Study. *J. Chem. Phys.* **1965**, *42*, 3054.
- (13) Bruker AXS APEX3, Bruker AXS, Madison, Wisconsin, **2015**.
- (14) Krause, L.; Herbst-Irmer, R.; Sheldrick, G. M.; Stalke, D., Comparison of Silver and Molybdenum Microfocus X-Ray Sources for Single-Crystal Structure Determination. *J. Appl. Crystallogr.* **2015**, *48*, 3.
- (15) Sheldrick, G., SHELXT – Integrated Space-Group and Crystal-Structure Determination. *Acta Crystallogr. A* **2015**, *71*, 3.
- (16) Sheldrick, G., Crystal Structure Refinement with Shelxl. *Acta Crystallogr. C* **2015**, *71*, 3.
- (17) Dolomanov, O. V.; Bourhis, L. J.; Gildea, R. J.; Howard, J. A. K.; Puschmann, H., Olex2: A Complete Structure Solution, Refinement and Analysis Program. *J. Appl. Crystallogr.* **2009**, *42*, 339.
- (18) Spek, A., Single-Crystal Structure Validation with the Program PLATON. *J. Appl. Crystallogr.* **2003**, *36*, 7.
- (19) Ramadhar, T. R.; Zheng, S.-L.; Chen, Y.-S.; Clardy, J., Analysis of Rapidly Synthesized Guest-Filled Porous Complexes with Synchrotron Radiation: Practical Guidelines for the Crystalline Sponge Method. *Acta Crystallogr. A* **2015**, *71*, 46.

(20) Persistence of Vision Raytracer. <http://www.povray.org/>.
